# Supplementary material for: Structural Engineering and Optimization of Zwitterionic Salts for Expeditious Discovery of Thermoresponsive Materials
Source: MDPI journal article supplement (doi:10.3390/molecules27010257), 2021-12-31
Supplement: s1 [file s1]

**(Supporting Information)**

**Structural Engineering and Optimization of Zwitterionic Salts for Expeditious Discovery of Thermoresponsive Materials**

Yen-Ho Chu\*, Chien-Yuan Chen, and Jin-Syuan Chen

Department of Chemistry and Biochemistry, National Chung Cheng University

Chiayi 62102, Taiwan, Republic of China

\* Corresponding author. Tel: 886 52729139; fax: 886 52721040; e-mail: [cheyhc@ccu.edu.tw](mailto:cheyhc@ccu.edu.tw)

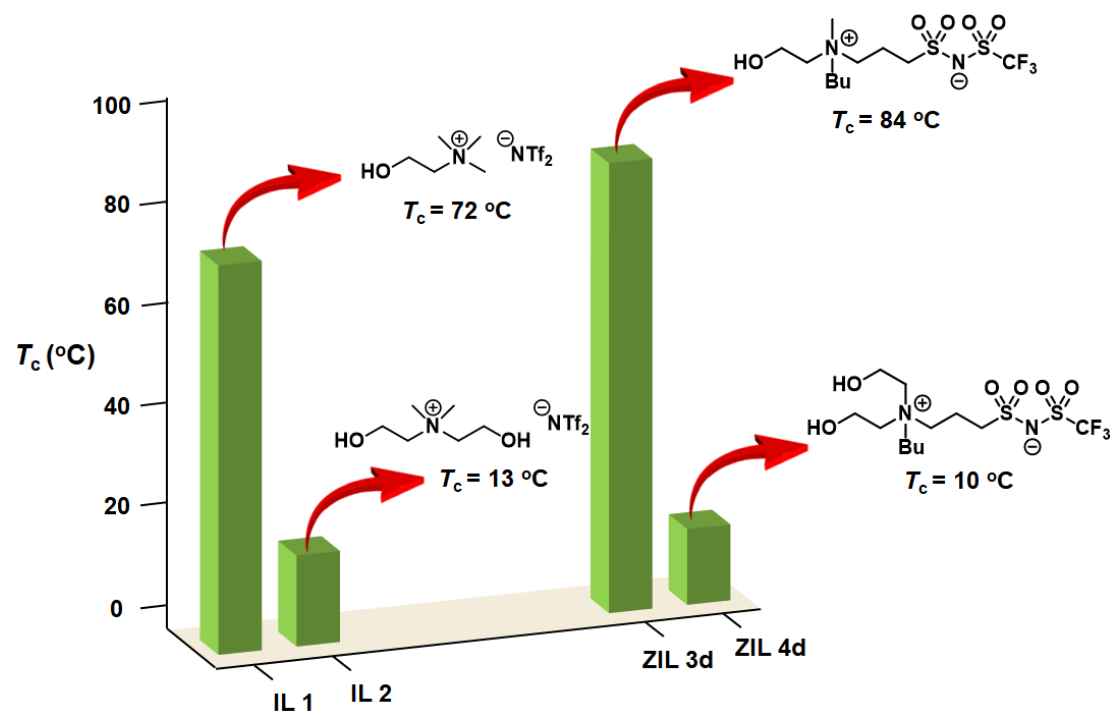

**Figure S1**  $T_c$  values of **IL 1** (72 °C), **IL 2** (13 °C), **ZIL 3d** (84 °C), and **ZIL 4d** (10 °C).

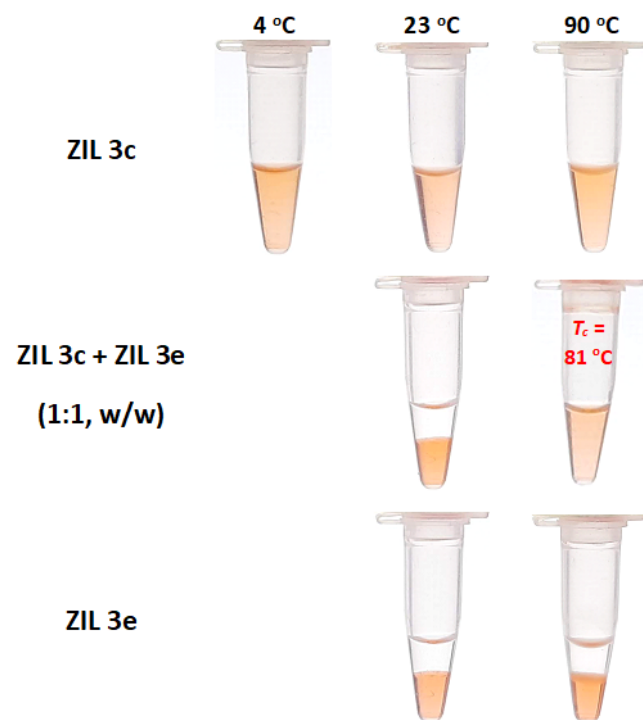

**Figure S2** Temperature dependence of phase behavior of mixtures (1:1, w/w) of water with **ZIL 3c**, **ZIL 3e**, and a binary mixture (1:1, w/w) of **ZIL 3c** and **ZIL 3e** exhibiting  $T_c = 81\text{ °C}$  (labeled in red).

$^1\text{H}$  NMR spectrum of **IL 2**

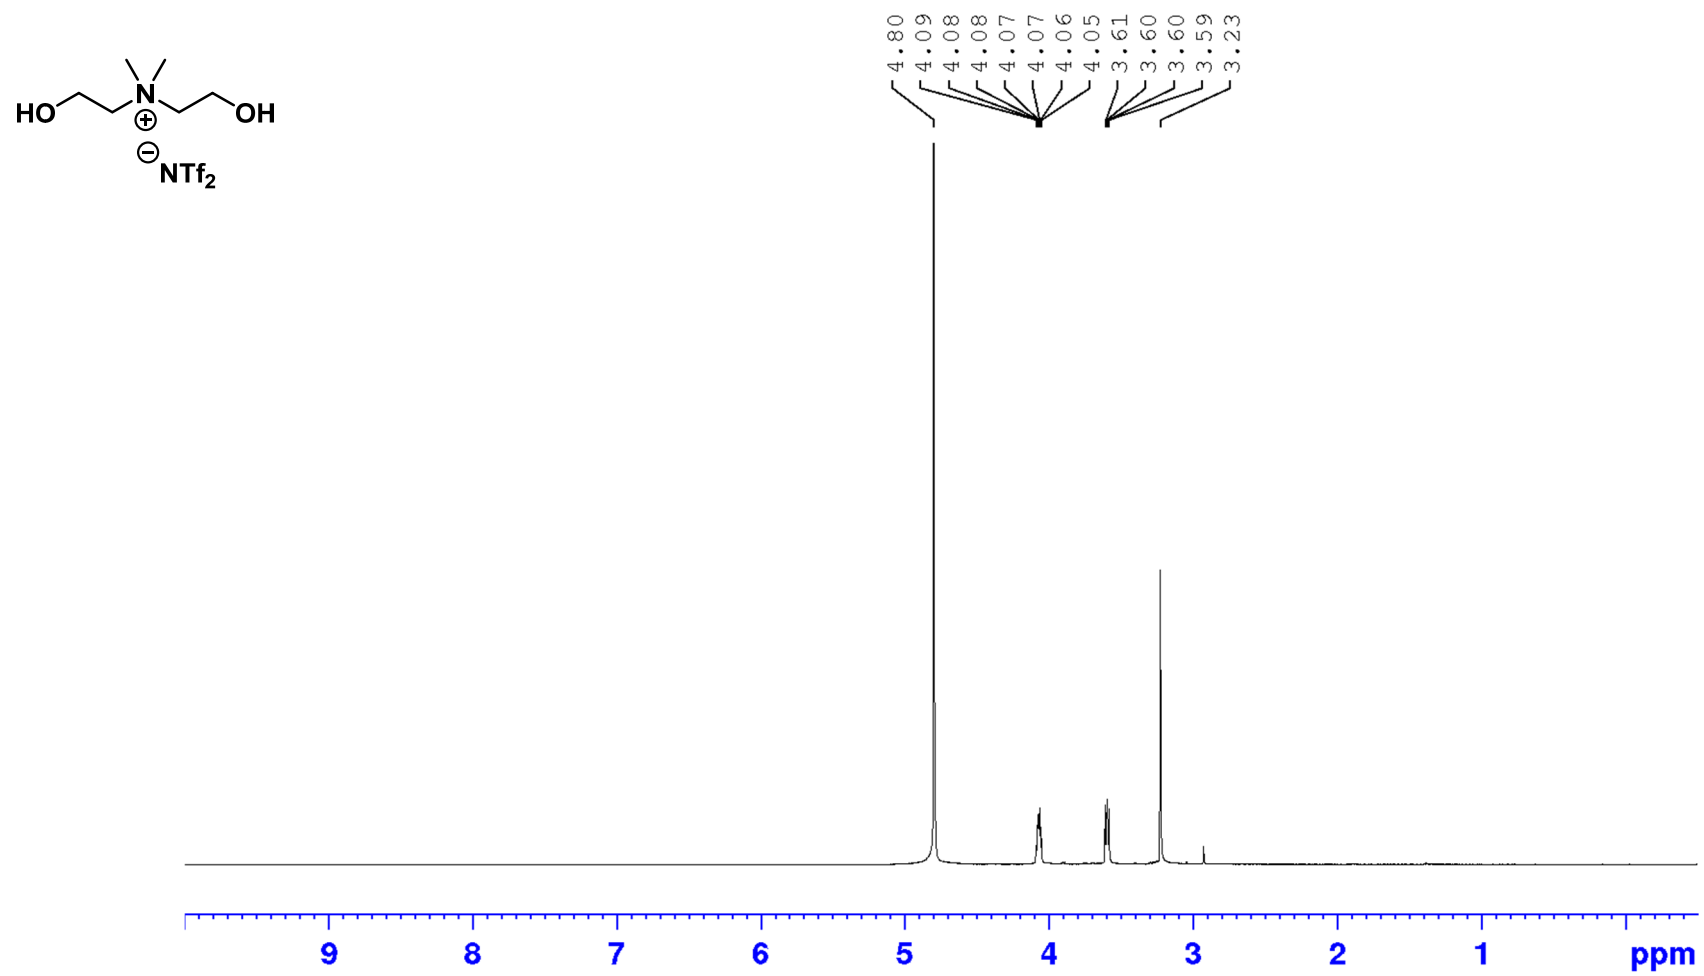

$^{13}\text{C}$  NMR spectrum of **IL 2**

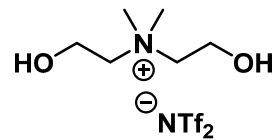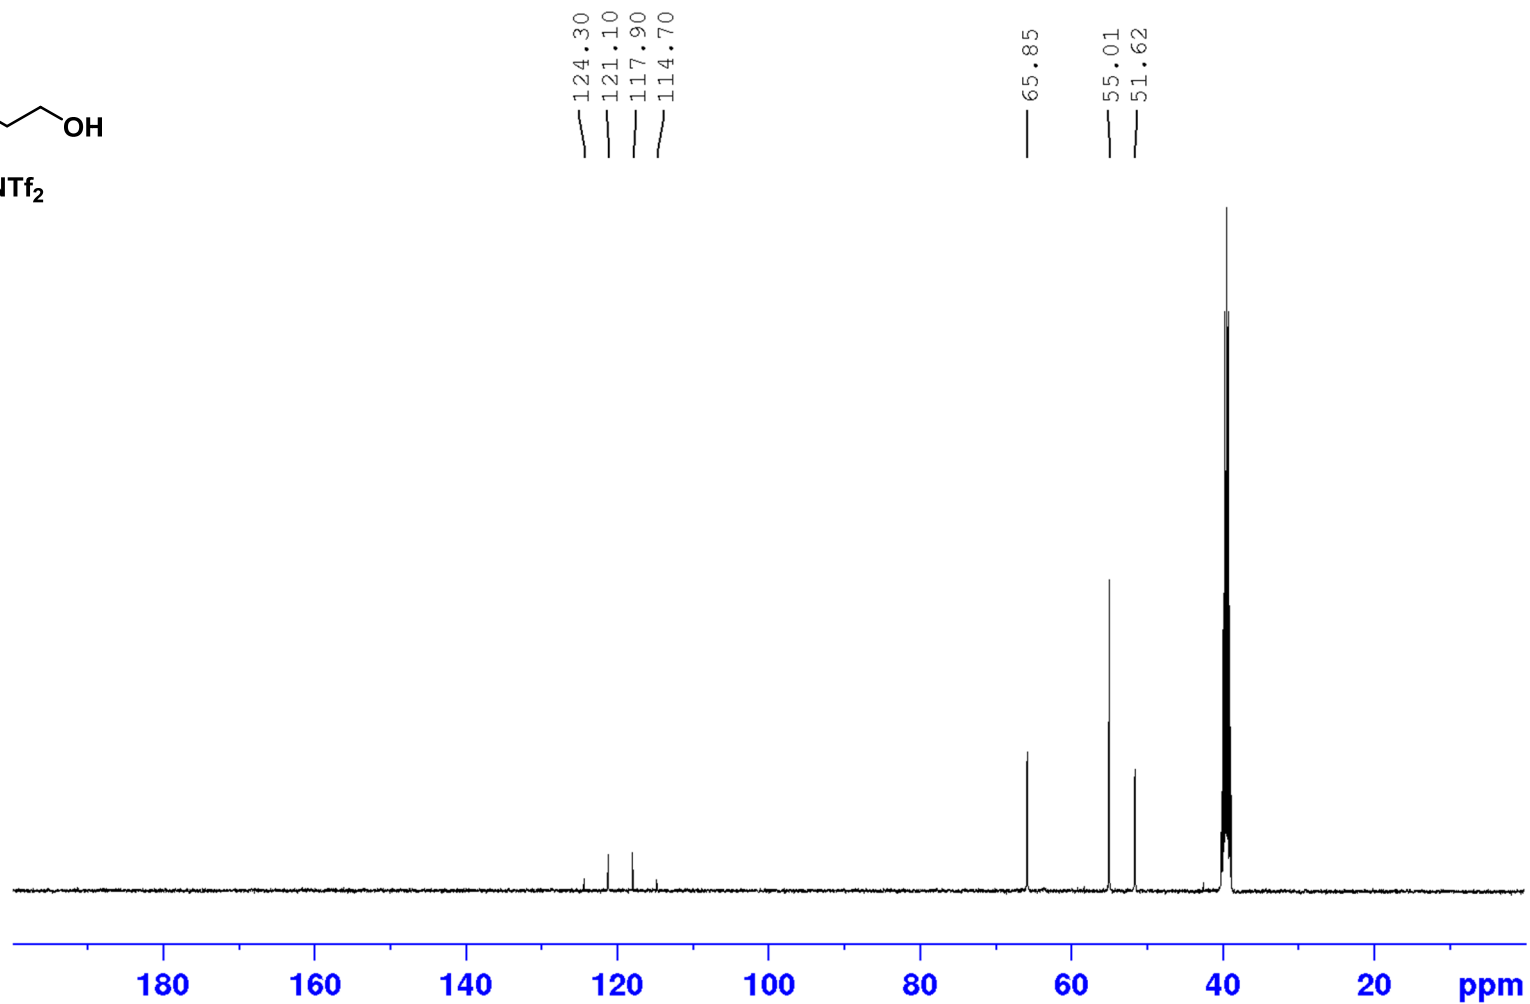

## Mass spectrum of IL 2

Spectrum

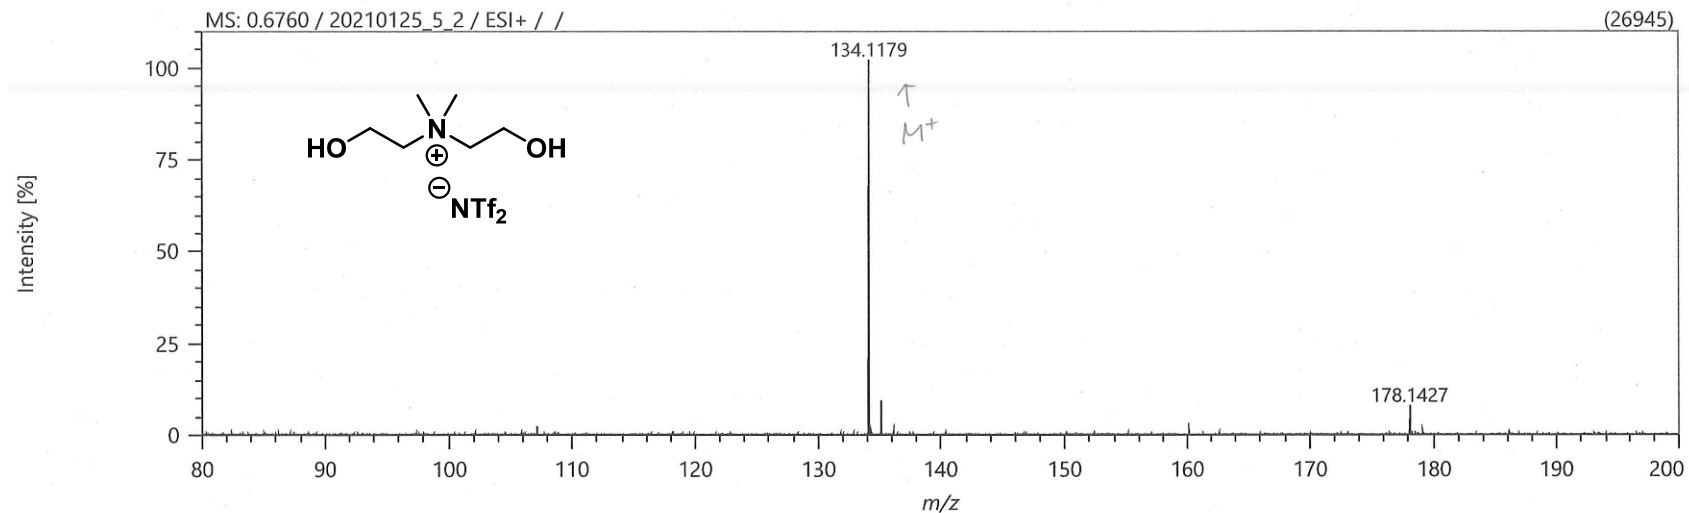

### Elemental Composition

Parameters

Tolerance:  $\pm 10.00$  ppm  
 Electron: Odd/Even  
 Charge: +1  
 DBE: -99.0 - 999.0

Elements Set 1:

| Symbol | C   | H    | N | O |
|--------|-----|------|---|---|
| Min    | 0   | 0    | 1 | 2 |
| Max    | 400 | 1000 | 1 | 2 |

### Results

| Mass      | Formula                                         | Calculated Mass | Mass Difference [mDa] | Mass Difference [ppm] | DBE  |
|-----------|-------------------------------------------------|-----------------|-----------------------|-----------------------|------|
| 134.11790 | C <sub>6</sub> H <sub>16</sub> N O <sub>2</sub> | 134.11756       | 0.34                  | 2.54                  | -0.5 |

$^1\text{H}$  NMR spectrum of 3-chloropropane-1-sulfonyl chloride (**2**)

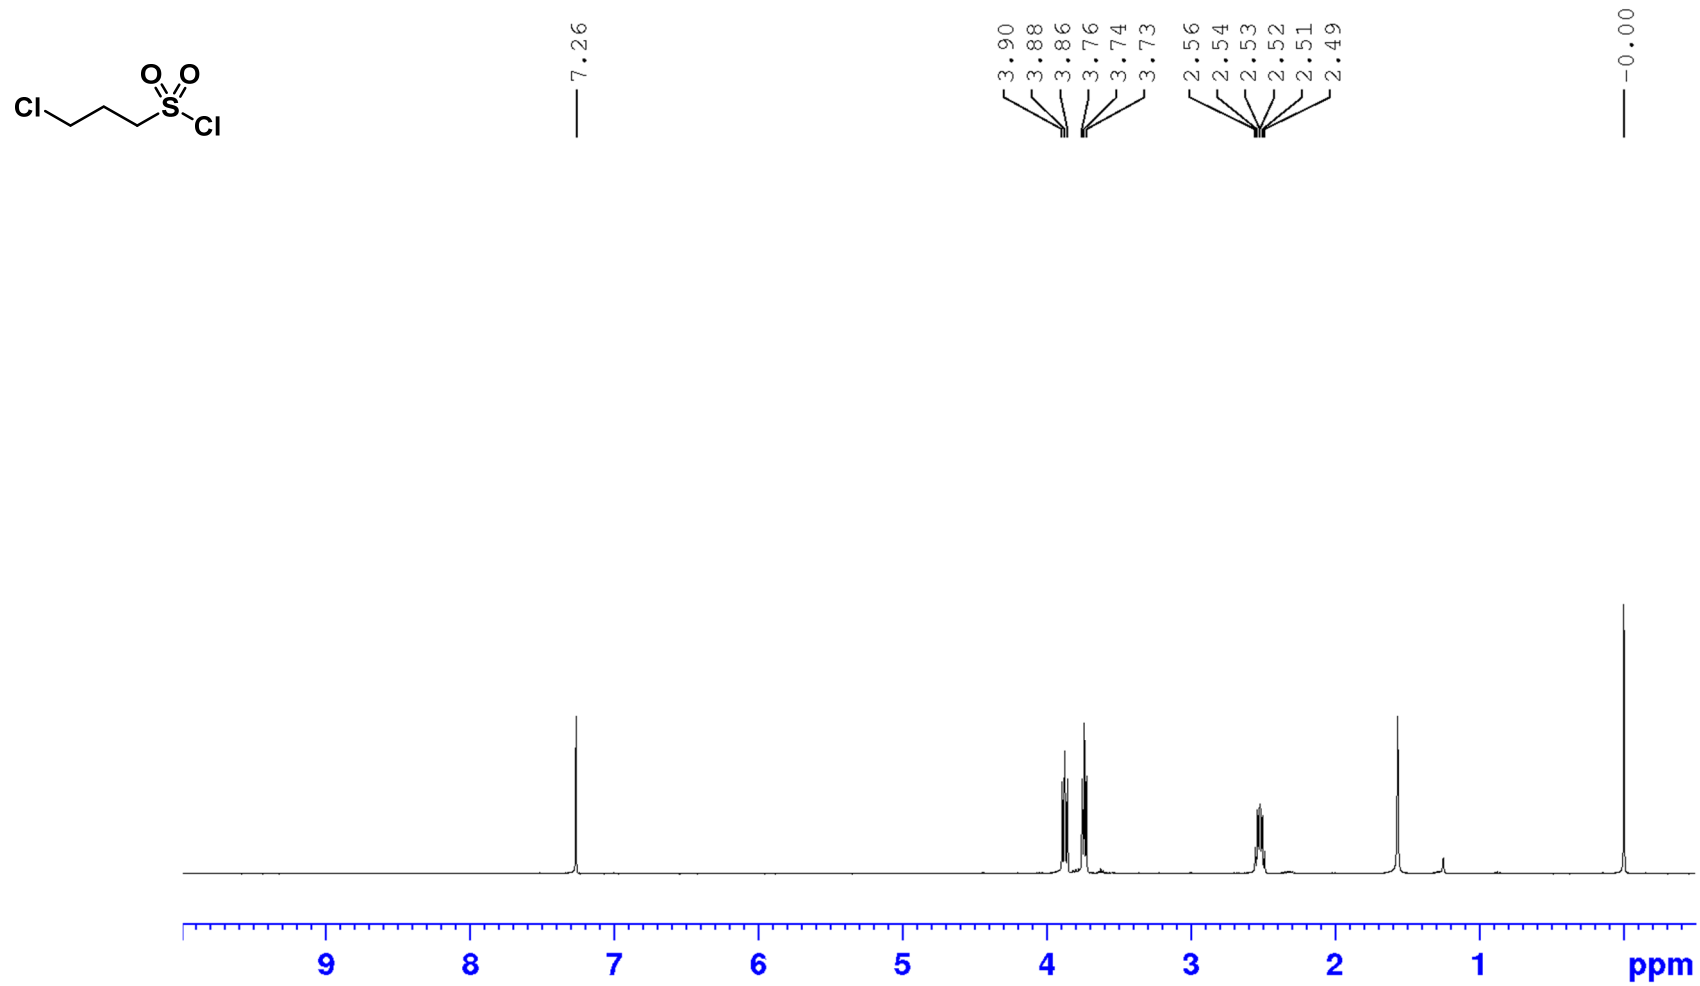

$^1\text{H}$  NMR spectrum of potassium ((3-chloropropyl)sulfonyl)((trifluoromethyl)sulfonyl)amide (**3**)

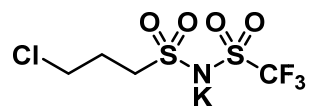

3.76  
3.74  
3.73  
3.11  
3.09  
3.07  
2.50  
2.14  
2.12  
2.11  
2.09  
2.07

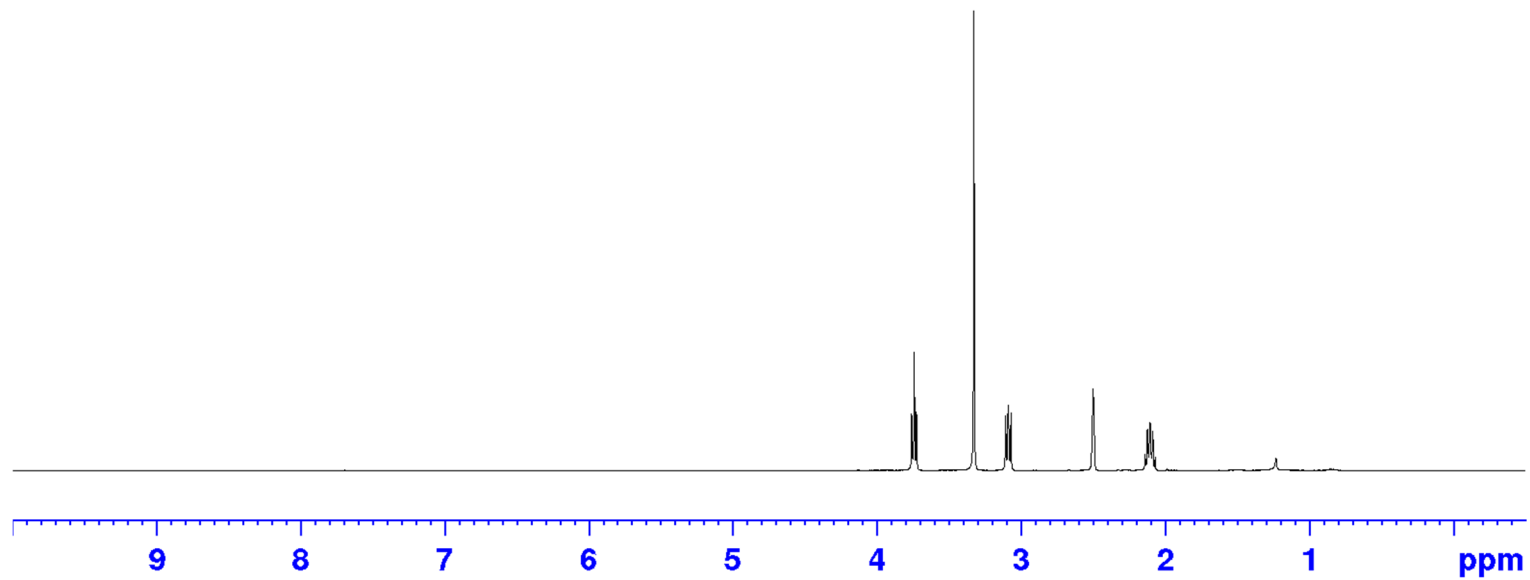

$^{19}\text{F}$  NMR spectrum of potassium ((3-chloropropyl)sulfonyl)((trifluoromethyl)sulfonyl)amide (**3**)

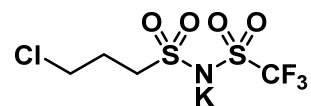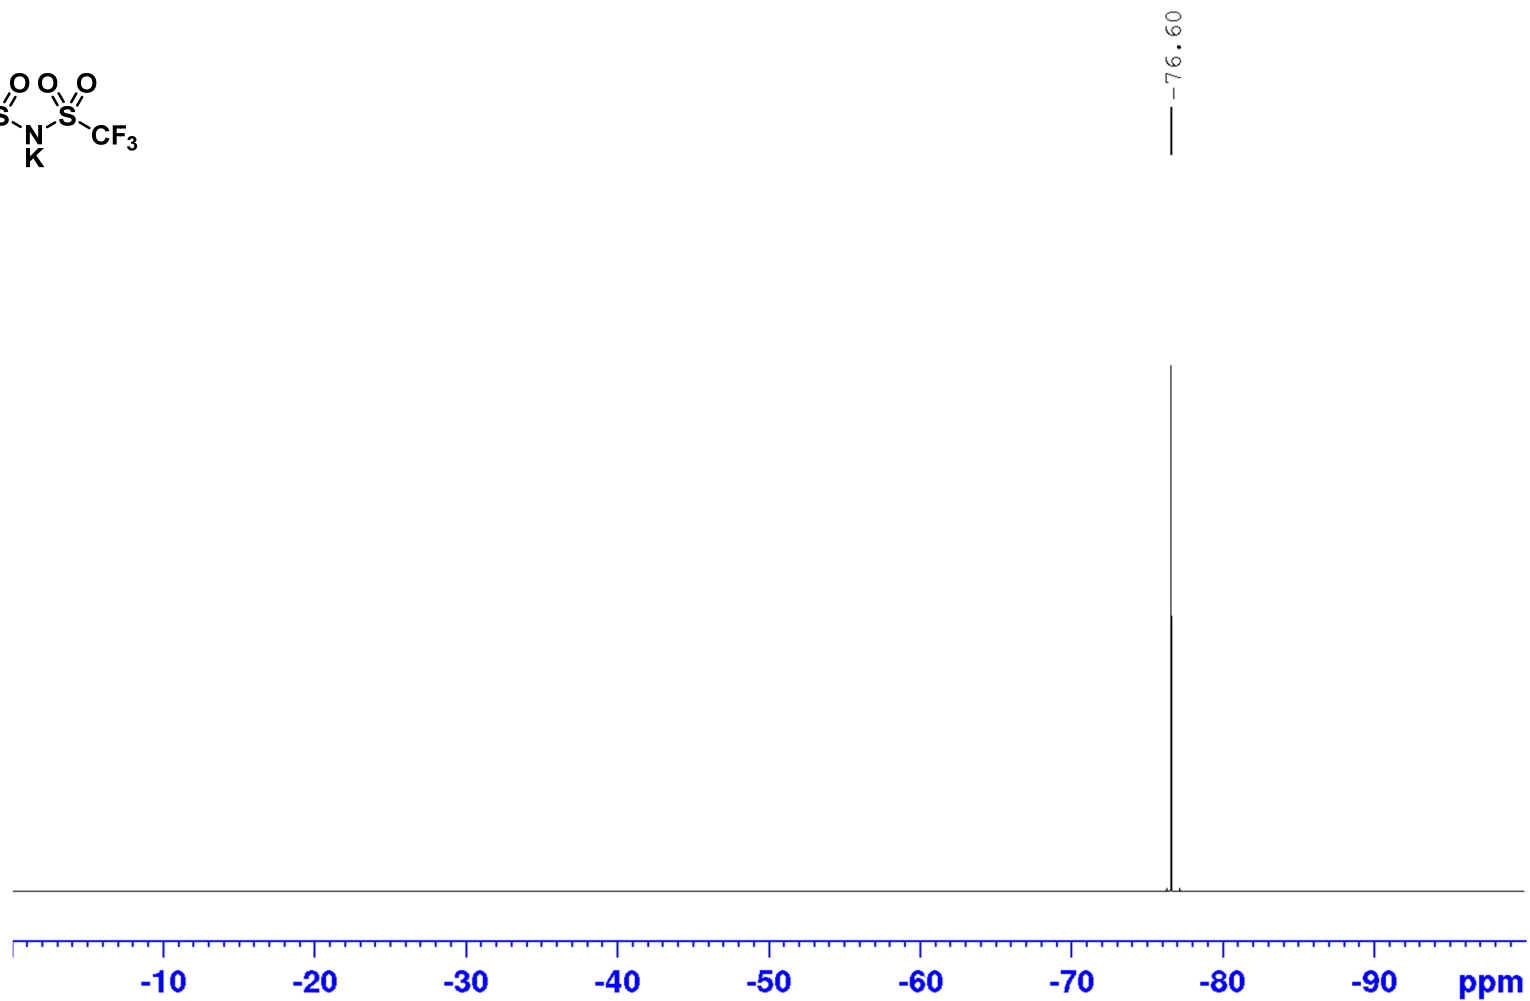

$^1\text{H}$  NMR spectrum of **ZIL 3a**

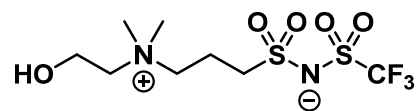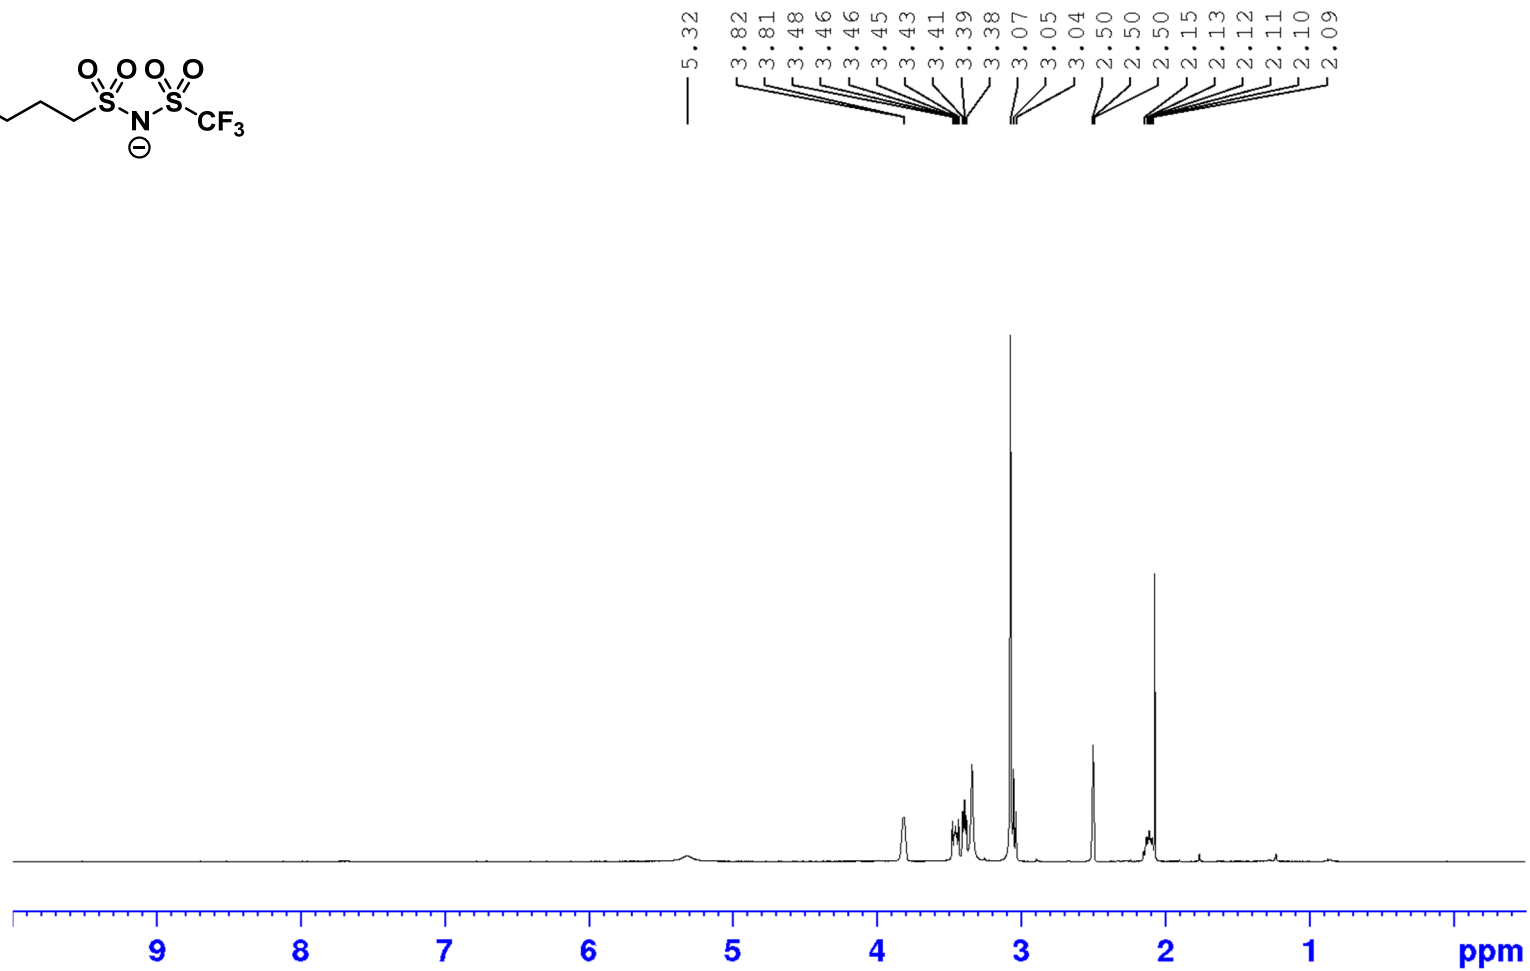

$^{19}\text{F}$  NMR spectrum of **ZIL 3a**



— -76.53

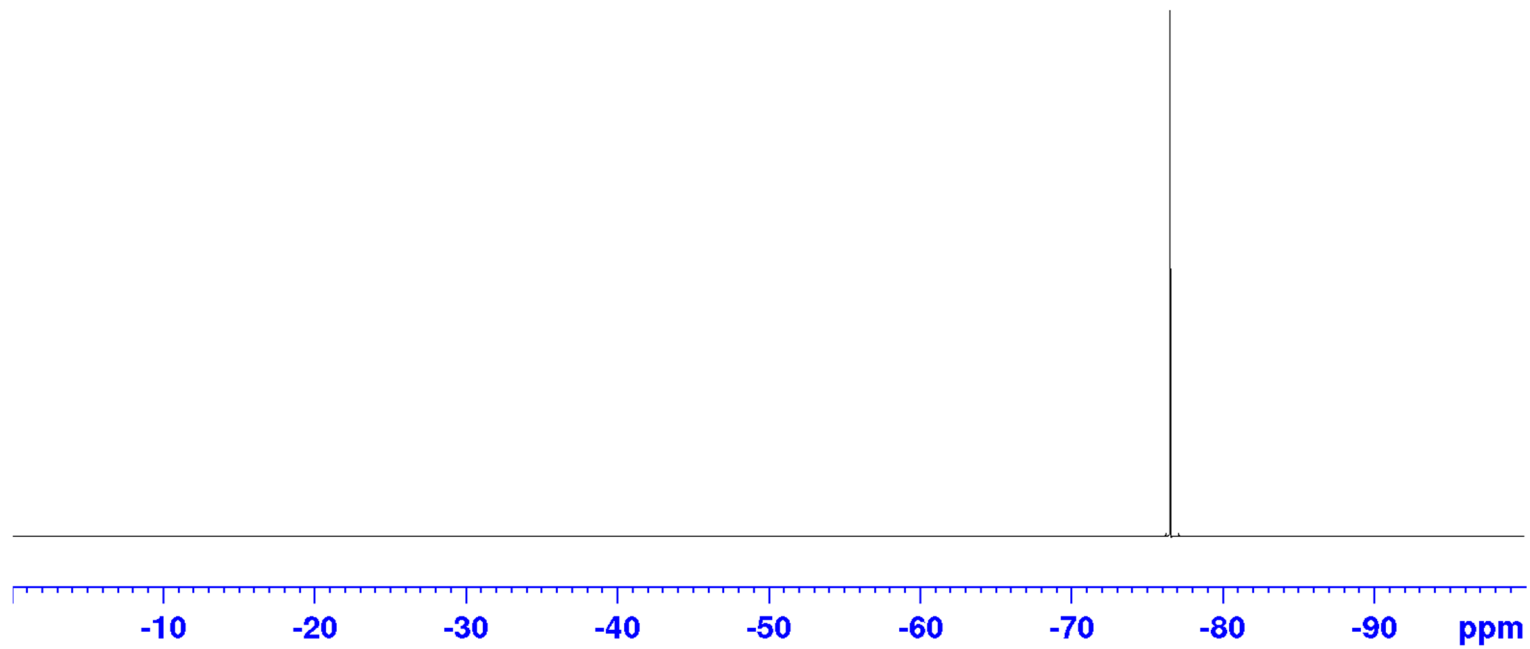

$^{13}\text{C}$  NMR spectrum of **ZIL 3a**

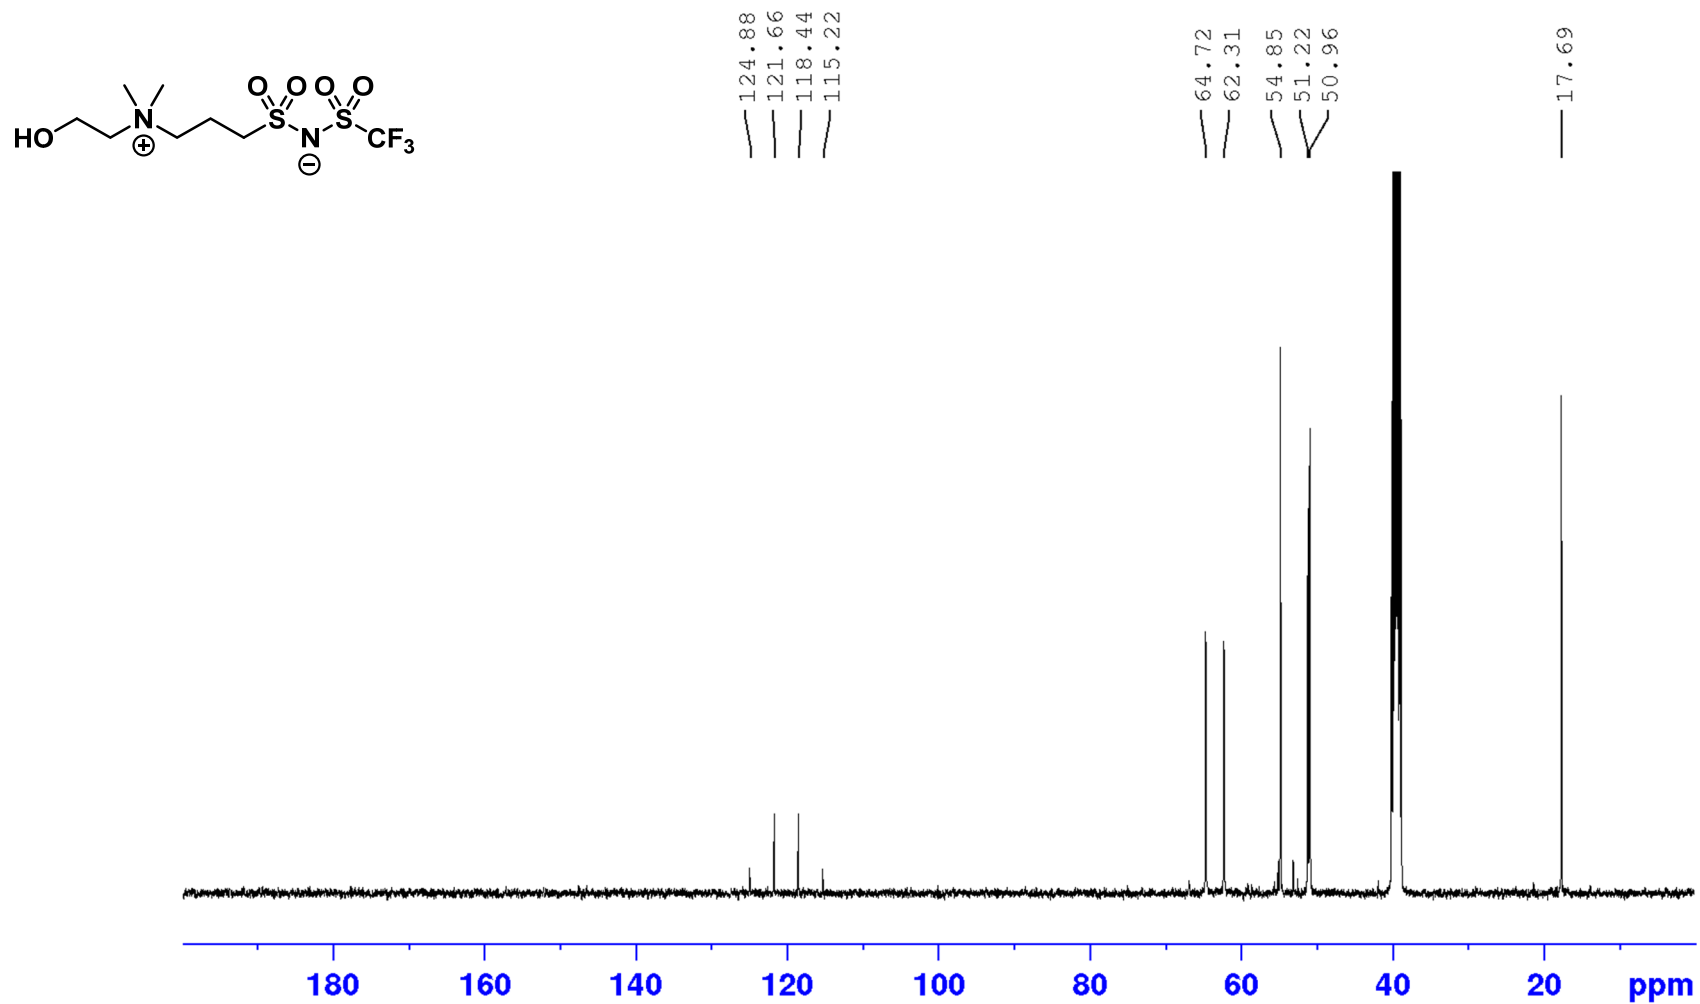

# Mass spectrum of ZIL 3a

Spectrum

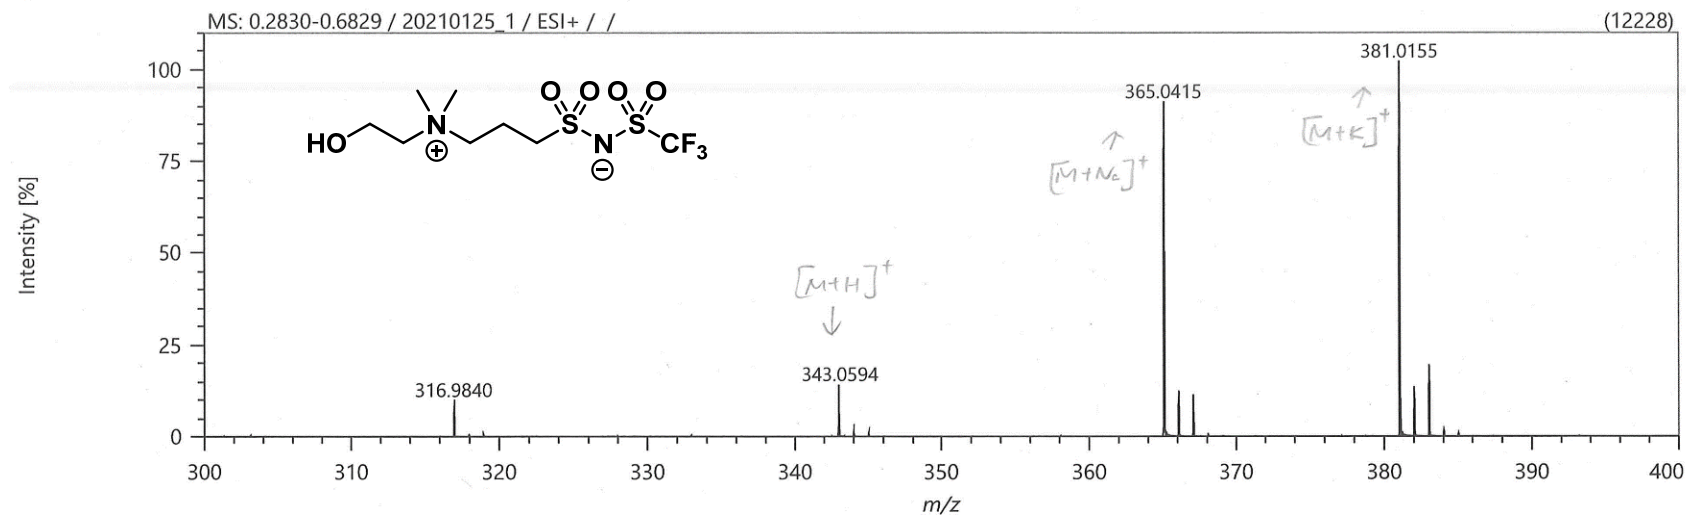

## Elemental Composition

Parameters

Tolerance:  $\pm 3.00$  ppm  
 Electron: Odd/Even  
 Charge: +1  
 DBE: -99.0 - 999.0

Elements Set 1:

| Symbol | C   | H    | N | O | S | F | Na | K |
|--------|-----|------|---|---|---|---|----|---|
| Min    | 0   | 0    | 2 | 5 | 2 | 3 | 0  | 0 |
| Max    | 400 | 1000 | 2 | 5 | 2 | 3 | 1  | 1 |

## Results

| Mass      | Formula               | Calculated Mass | Mass Difference [mDa] | Mass Difference [ppm] | DBE  |
|-----------|-----------------------|-----------------|-----------------------|-----------------------|------|
| 343.05943 | C8 H18 N2 O5 F3 S2    | 343.06037       | -0.94                 | -2.74                 | -0.5 |
| 365.04147 | C8 H17 N2 O5 F3 Na S2 | 365.04232       | -0.85                 | -2.32                 | -0.5 |
| 381.01550 | C8 H17 N2 O5 F3 S2 K  | 381.01626       | -0.75                 | -1.97                 | -0.5 |

$^1\text{H}$  NMR spectrum of **ZIL 3b**

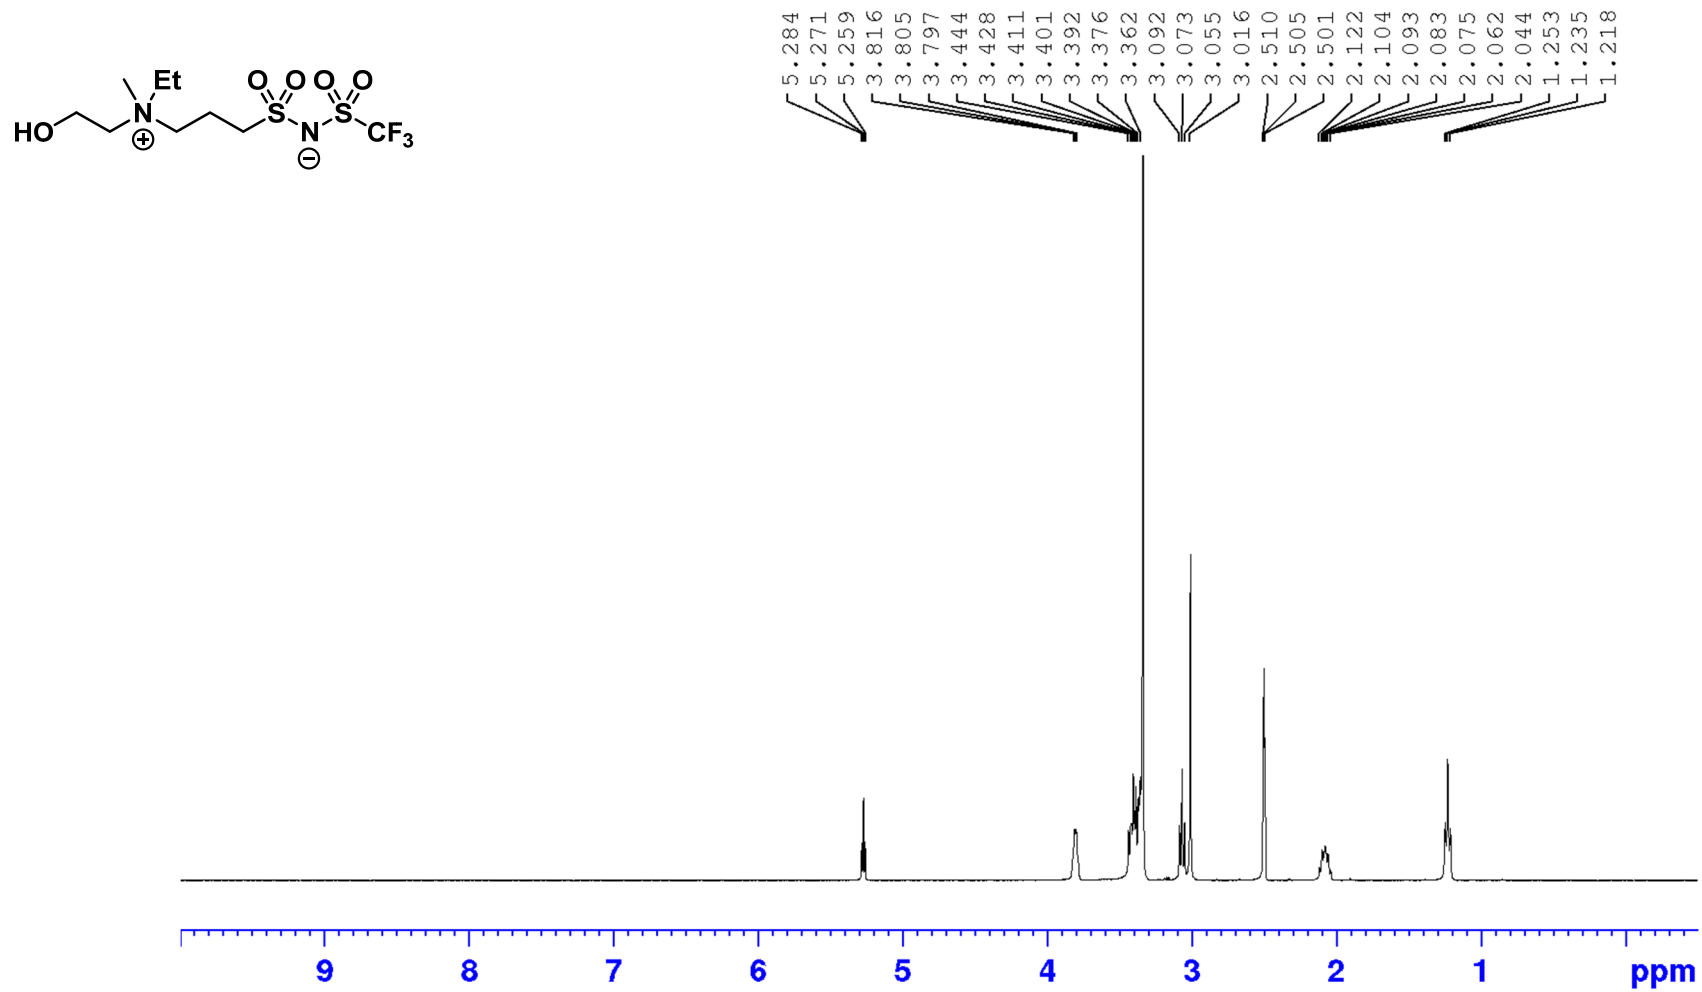

$^{19}\text{F}$  NMR spectrum of **ZIL 3b**

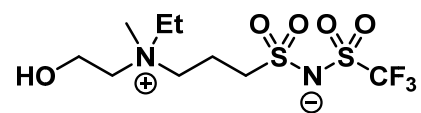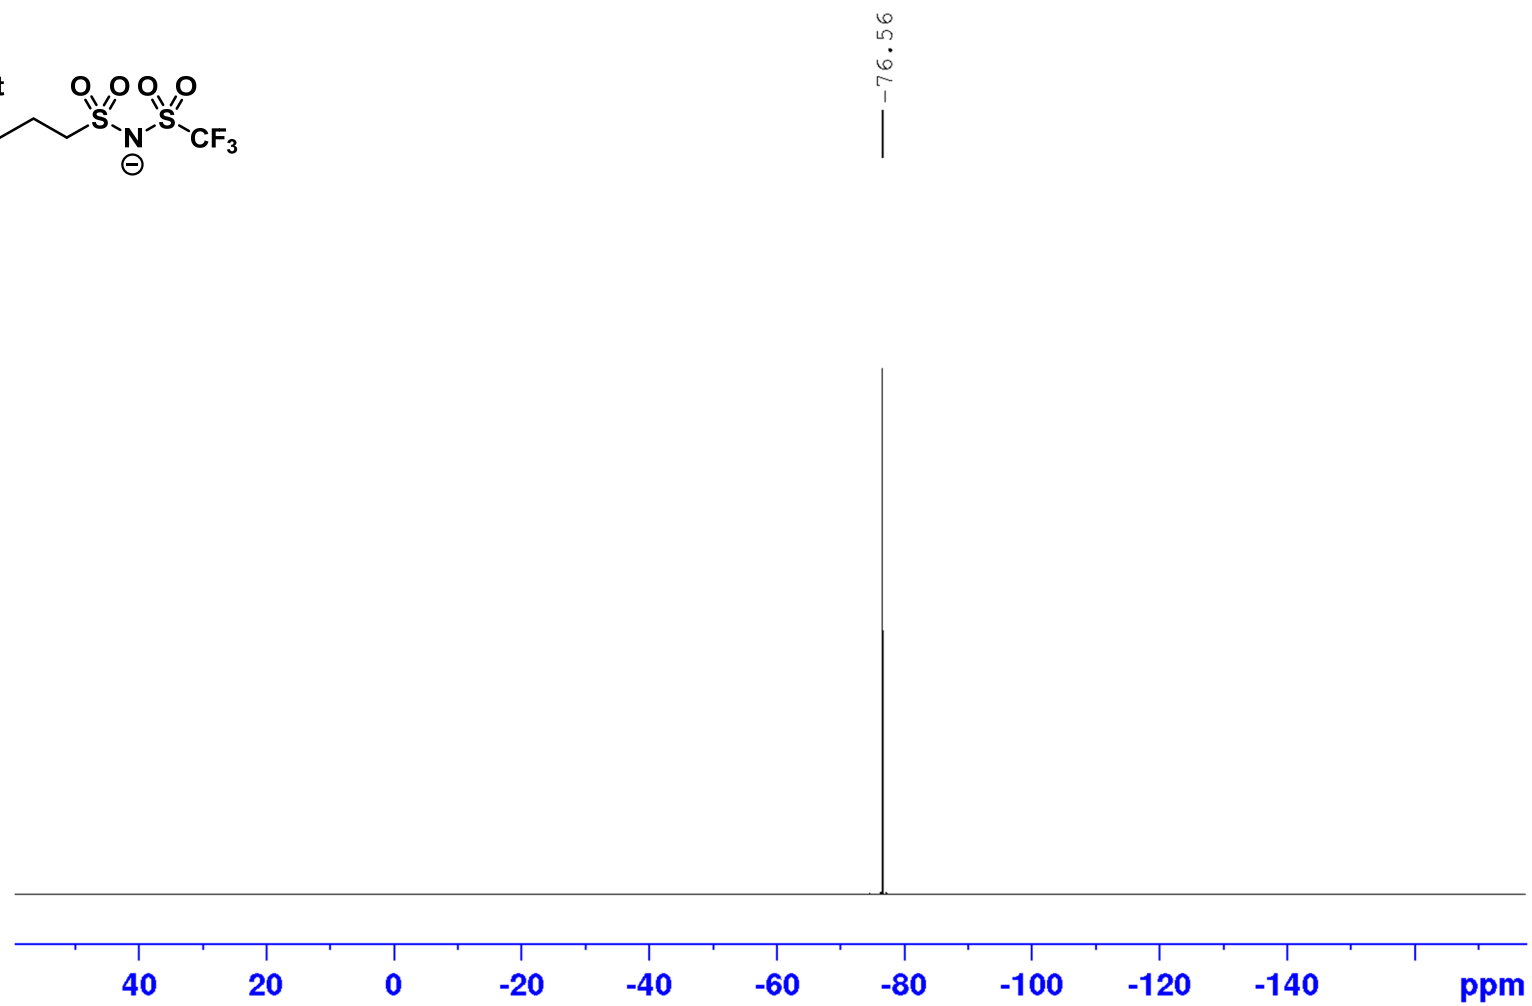

$^{13}\text{C}$  NMR spectrum of **ZIL 3b**

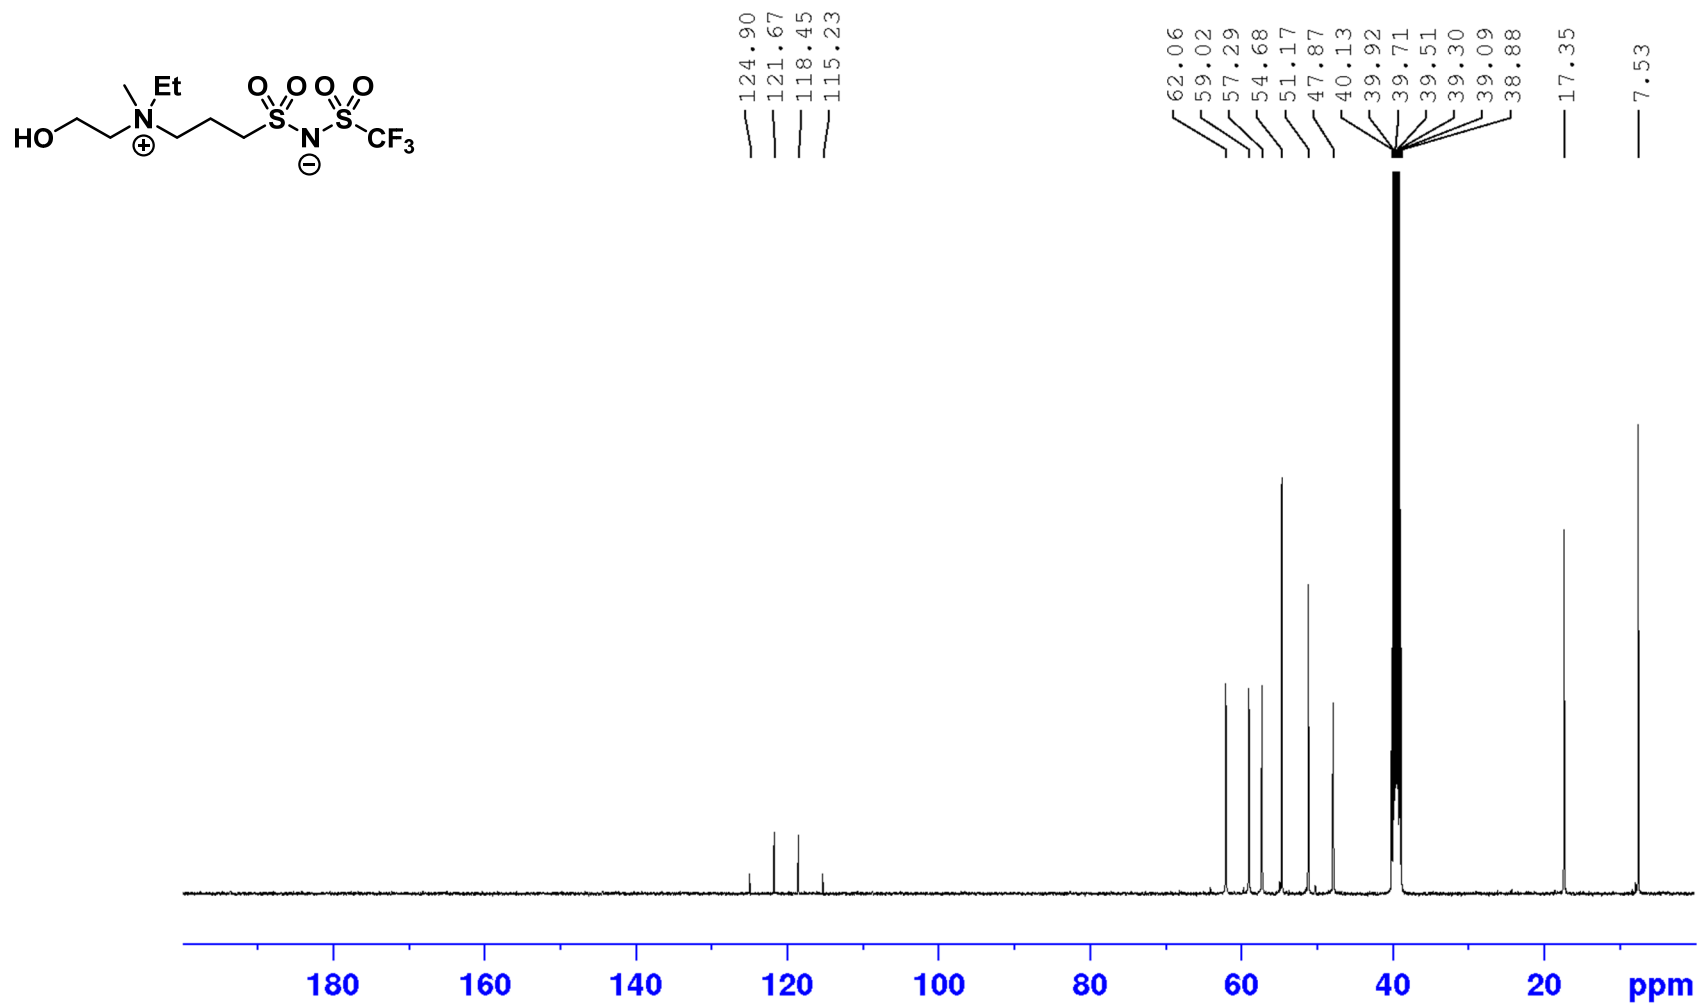

# Mass spectrum of ZIL 3b

Spectrum

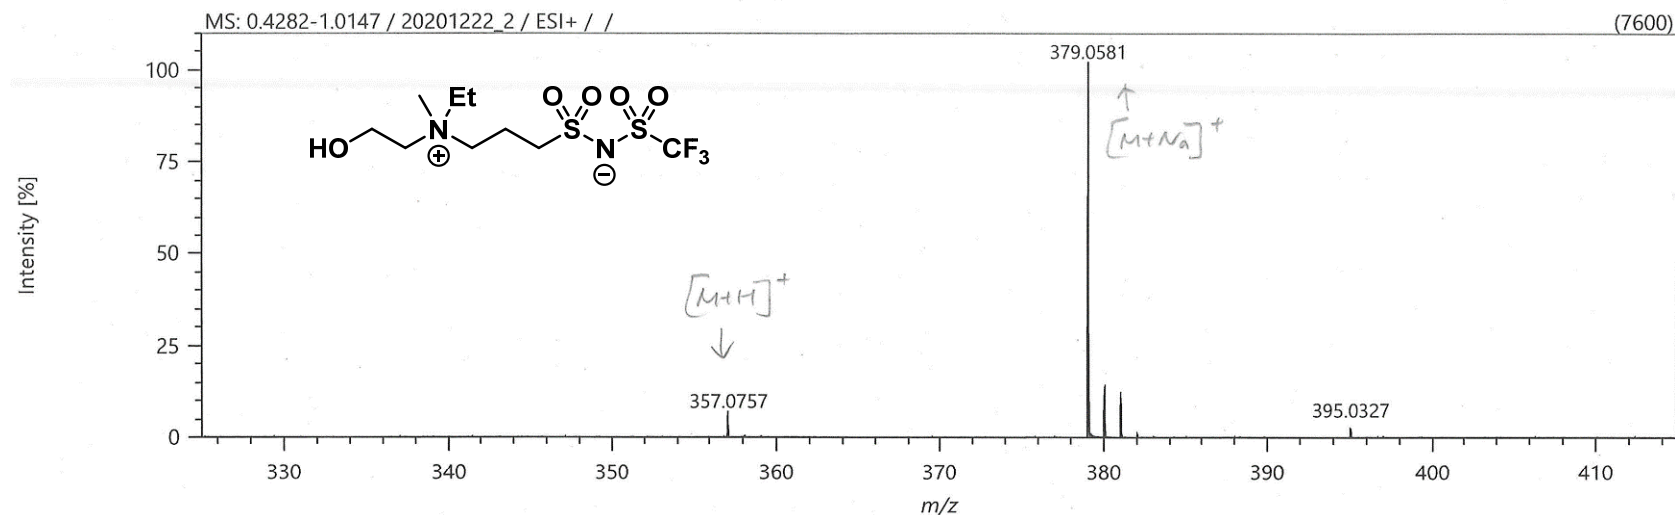

## Elemental Composition

Parameters

Tolerance:  $\pm 2.00$  ppm  
 Electron: Odd/Even  
 Charge: +1  
 DBE: -99.0 - 999.0

Elements Set 1:

| Symbol | C   | H    | F | N | O | S | Na |
|--------|-----|------|---|---|---|---|----|
| Min    | 0   | 0    | 3 | 2 | 5 | 2 | 0  |
| Max    | 400 | 1000 | 3 | 2 | 5 | 2 | 1  |

## Results

| Mass      | Formula                                                                                      | Calculated Mass | Mass Difference [mDa] | Mass Difference [ppm] | DBE  |
|-----------|----------------------------------------------------------------------------------------------|-----------------|-----------------------|-----------------------|------|
| 357.07565 | C <sub>9</sub> H <sub>20</sub> N <sub>2</sub> O <sub>5</sub> F <sub>3</sub> S <sub>2</sub>   | 357.07602       | -0.37                 | -1.04                 | -0.5 |
| 379.05809 | C <sub>9</sub> H <sub>19</sub> N <sub>2</sub> O <sub>5</sub> F <sub>3</sub> NaS <sub>2</sub> | 379.05797       | 0.12                  | 0.33                  | -0.5 |

$^1\text{H}$  NMR spectrum of **ZIL 3c**

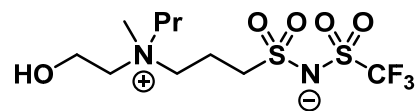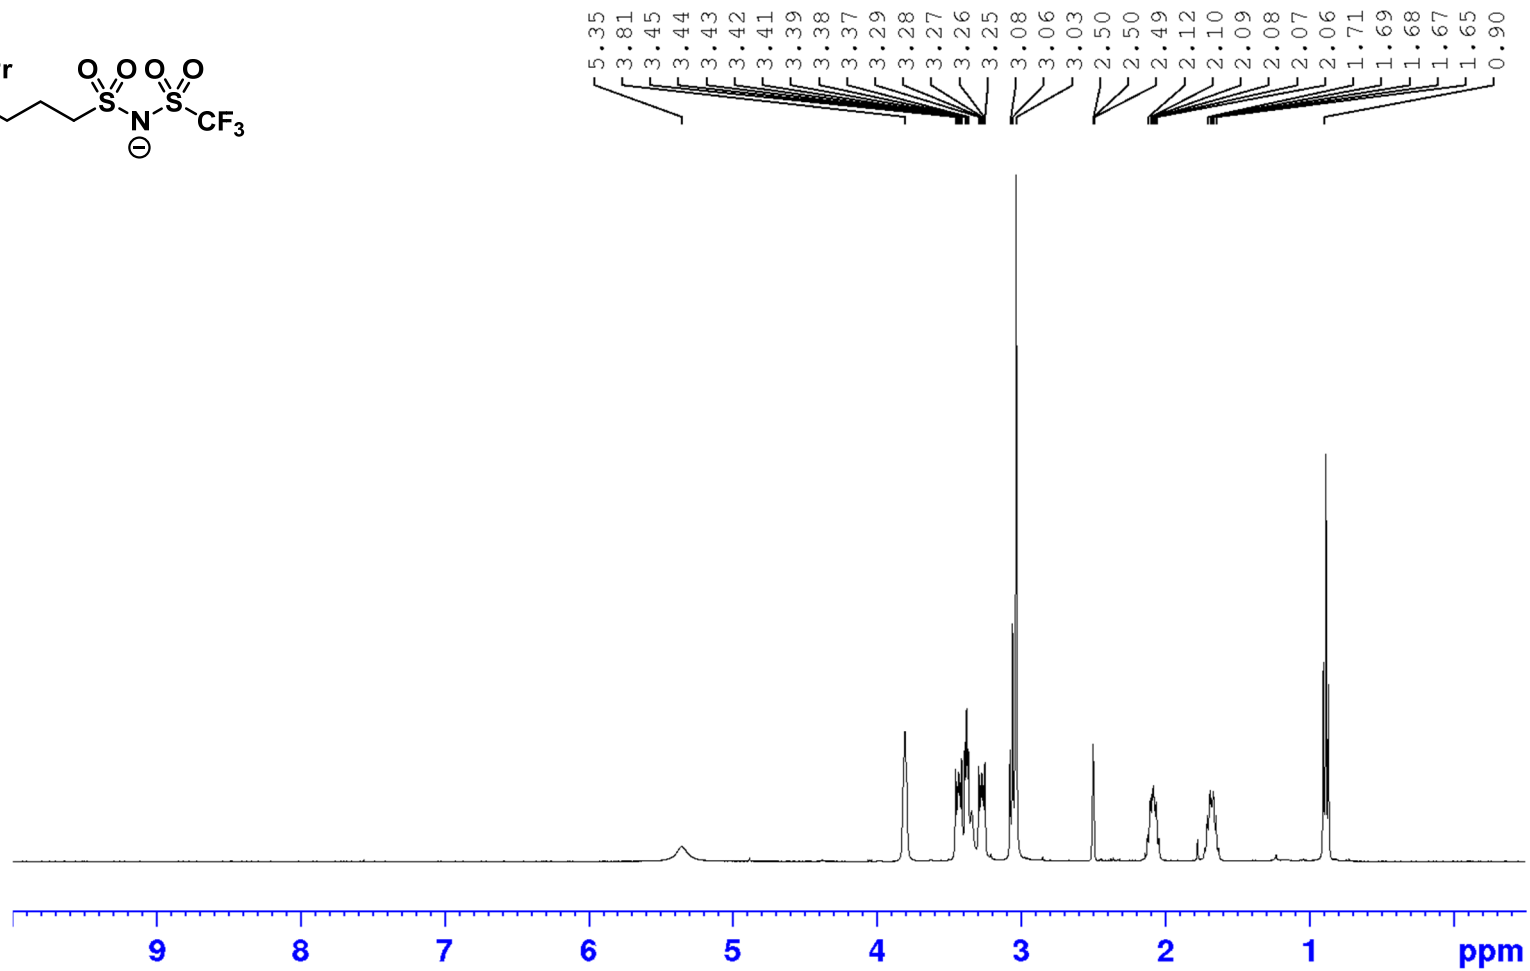

$^{19}\text{F}$  NMR spectrum of **ZIL 3c**

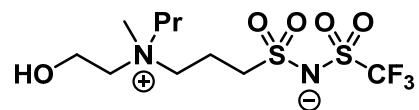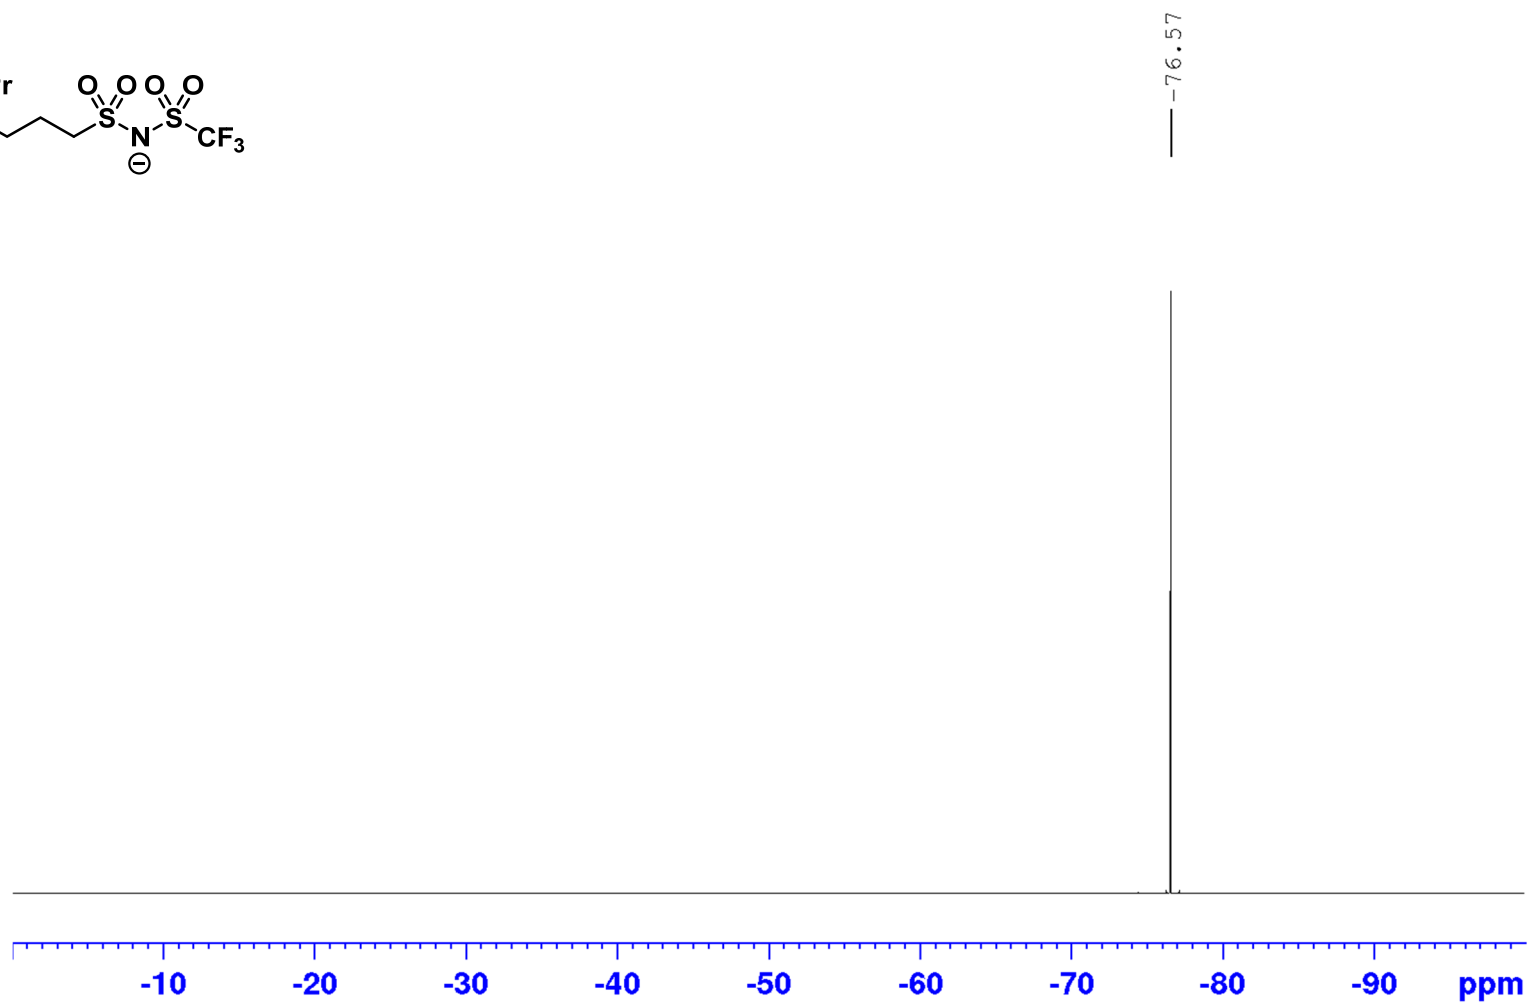

$^{13}\text{C}$  NMR spectrum of **ZIL 3c**

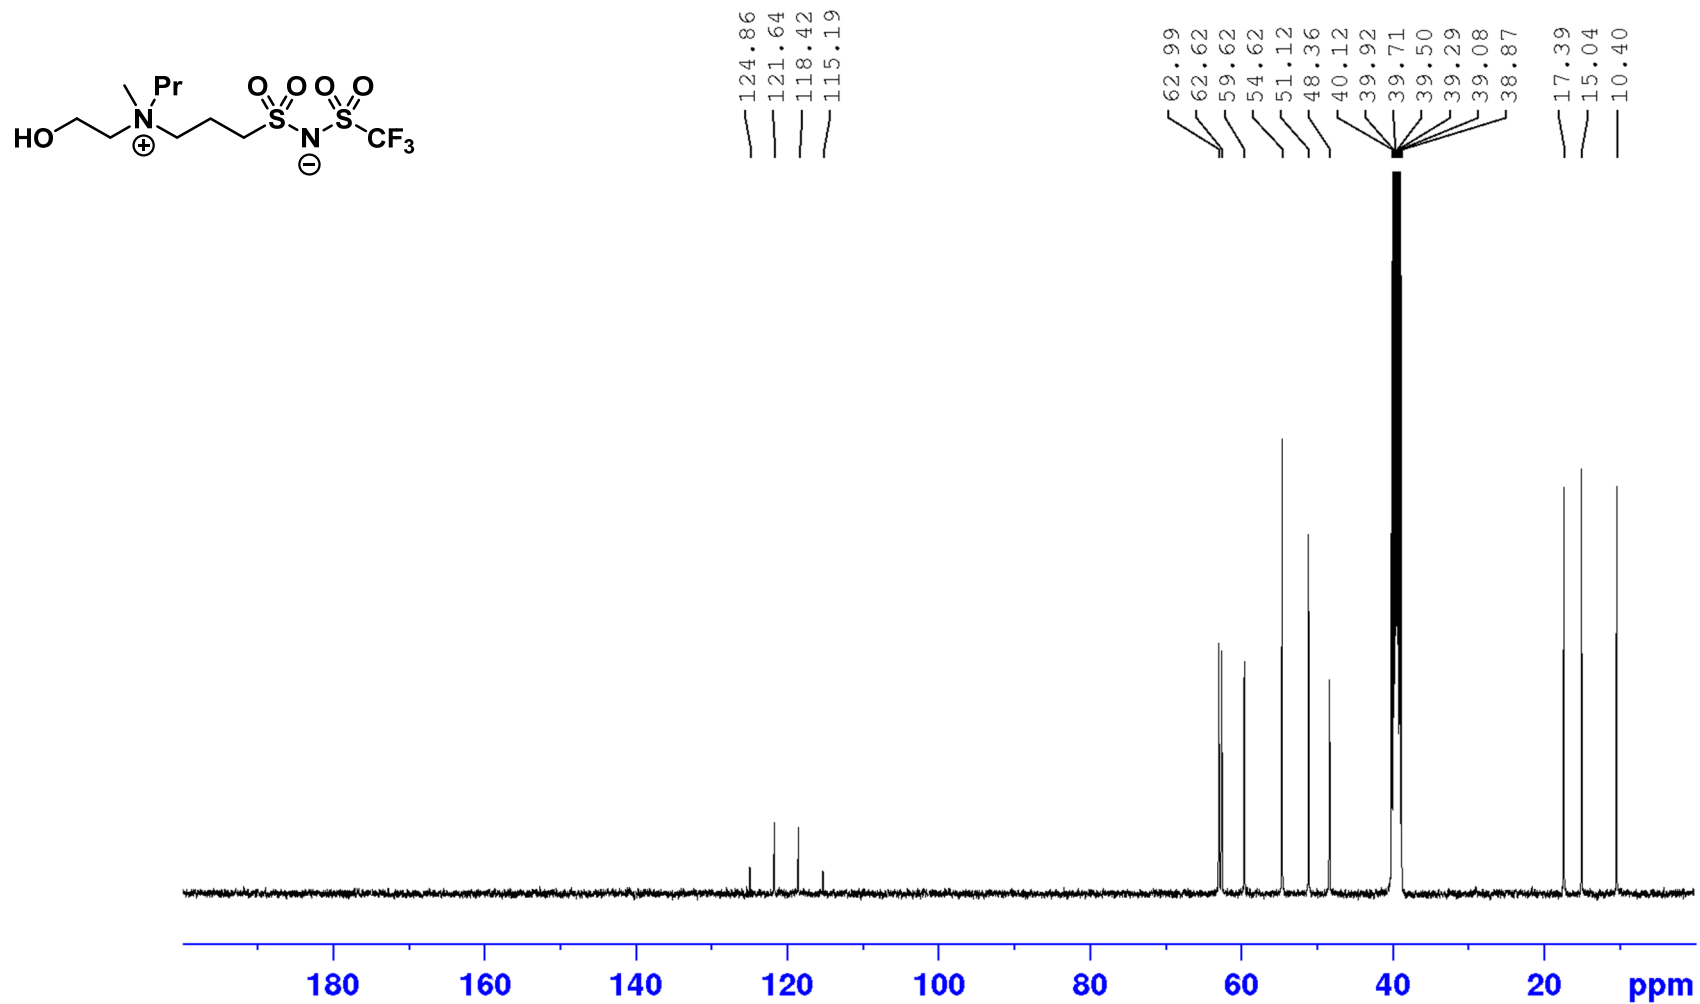

# Mass spectrum of ZIL 3c

Spectrum

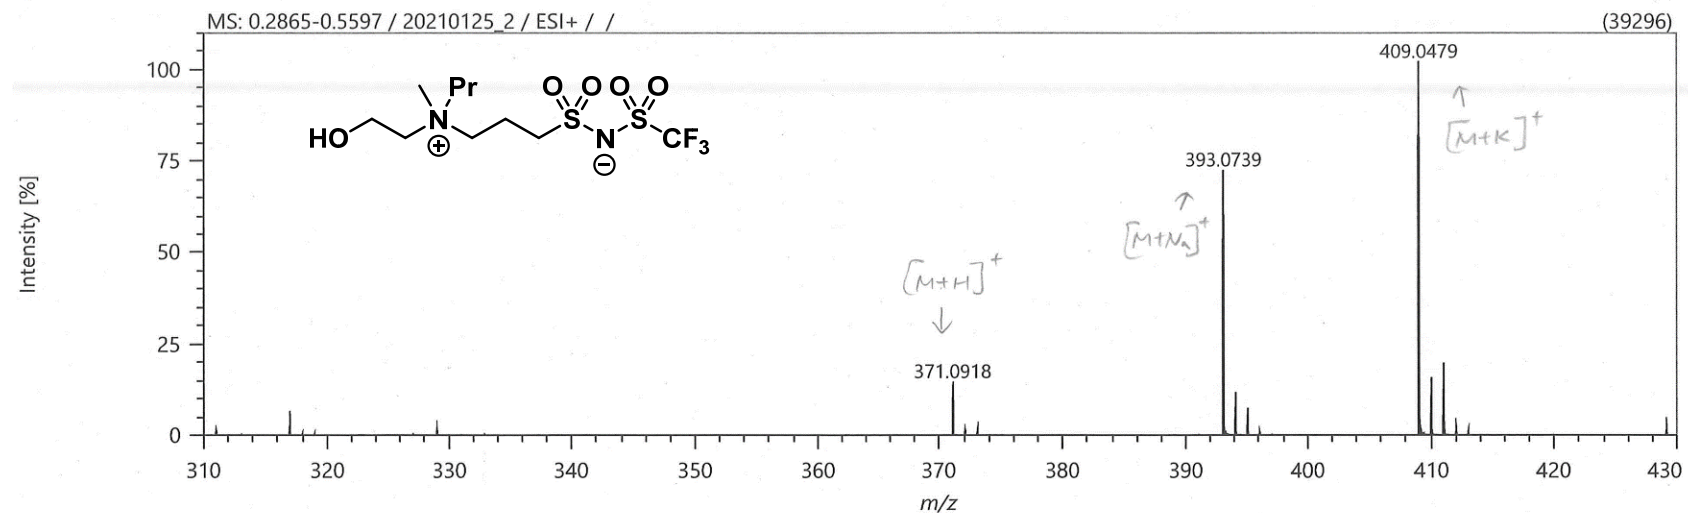

## Elemental Composition

Parameters

Tolerance:  $\pm 3.00$  ppm  
 Electron: Odd/Even  
 Charge: +1  
 DBE: -99.0 - 999.0

Elements Set 1:

| Symbol | C   | H    | N | O | S | F | Na | K |
|--------|-----|------|---|---|---|---|----|---|
| Min    | 0   | 0    | 2 | 5 | 2 | 3 | 0  | 0 |
| Max    | 400 | 1000 | 2 | 5 | 2 | 3 | 1  | 1 |

## Results

| Mass      | Formula                                                                                        | Calculated Mass | Mass Difference [mDa] | Mass Difference [ppm] | DBE  |
|-----------|------------------------------------------------------------------------------------------------|-----------------|-----------------------|-----------------------|------|
| 371.09184 | C <sub>10</sub> H <sub>22</sub> N <sub>2</sub> O <sub>5</sub> F <sub>3</sub> S <sub>2</sub>    | 371.09167       | 0.16                  | 0.44                  | -0.5 |
| 393.07385 | C <sub>10</sub> H <sub>21</sub> N <sub>2</sub> O <sub>5</sub> F <sub>3</sub> Na S <sub>2</sub> | 393.07362       | 0.23                  | 0.59                  | -0.5 |
| 409.04788 | C <sub>10</sub> H <sub>21</sub> N <sub>2</sub> O <sub>5</sub> F <sub>3</sub> S <sub>2</sub> K  | 409.04756       | 0.33                  | 0.80                  | -0.5 |

$^1\text{H}$  NMR spectrum of **ZIL 3d**

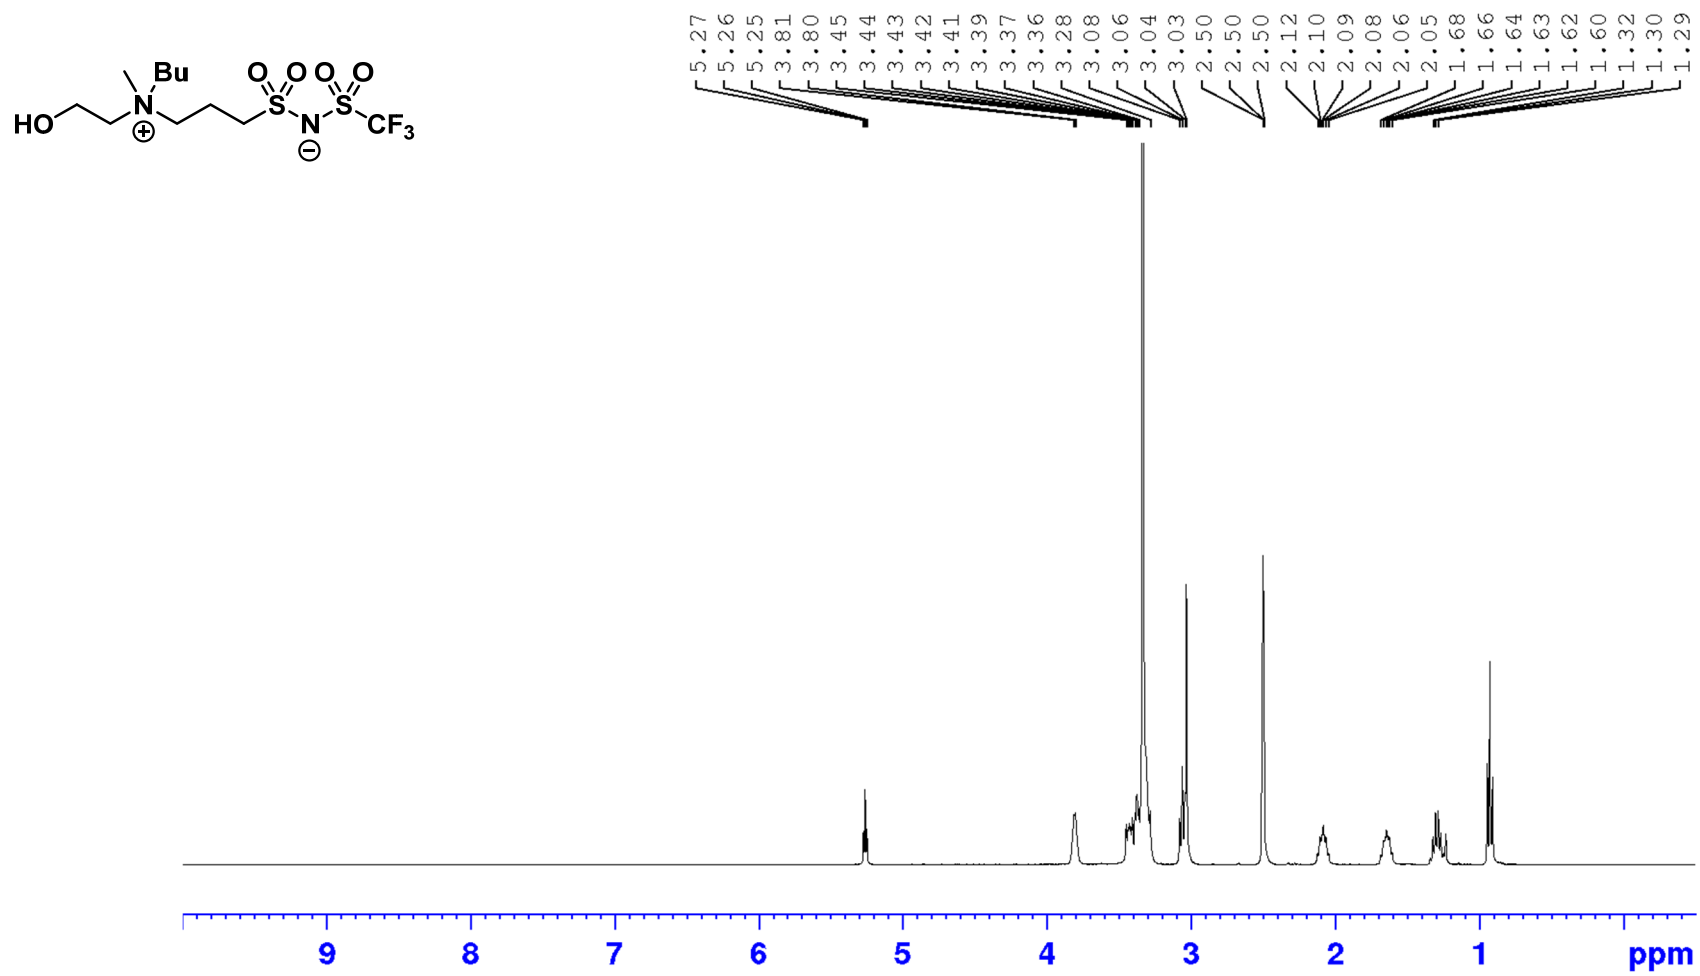

$^{19}\text{F}$  NMR spectrum of **ZIL 3d**

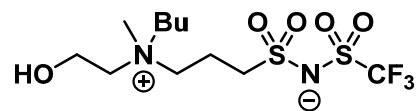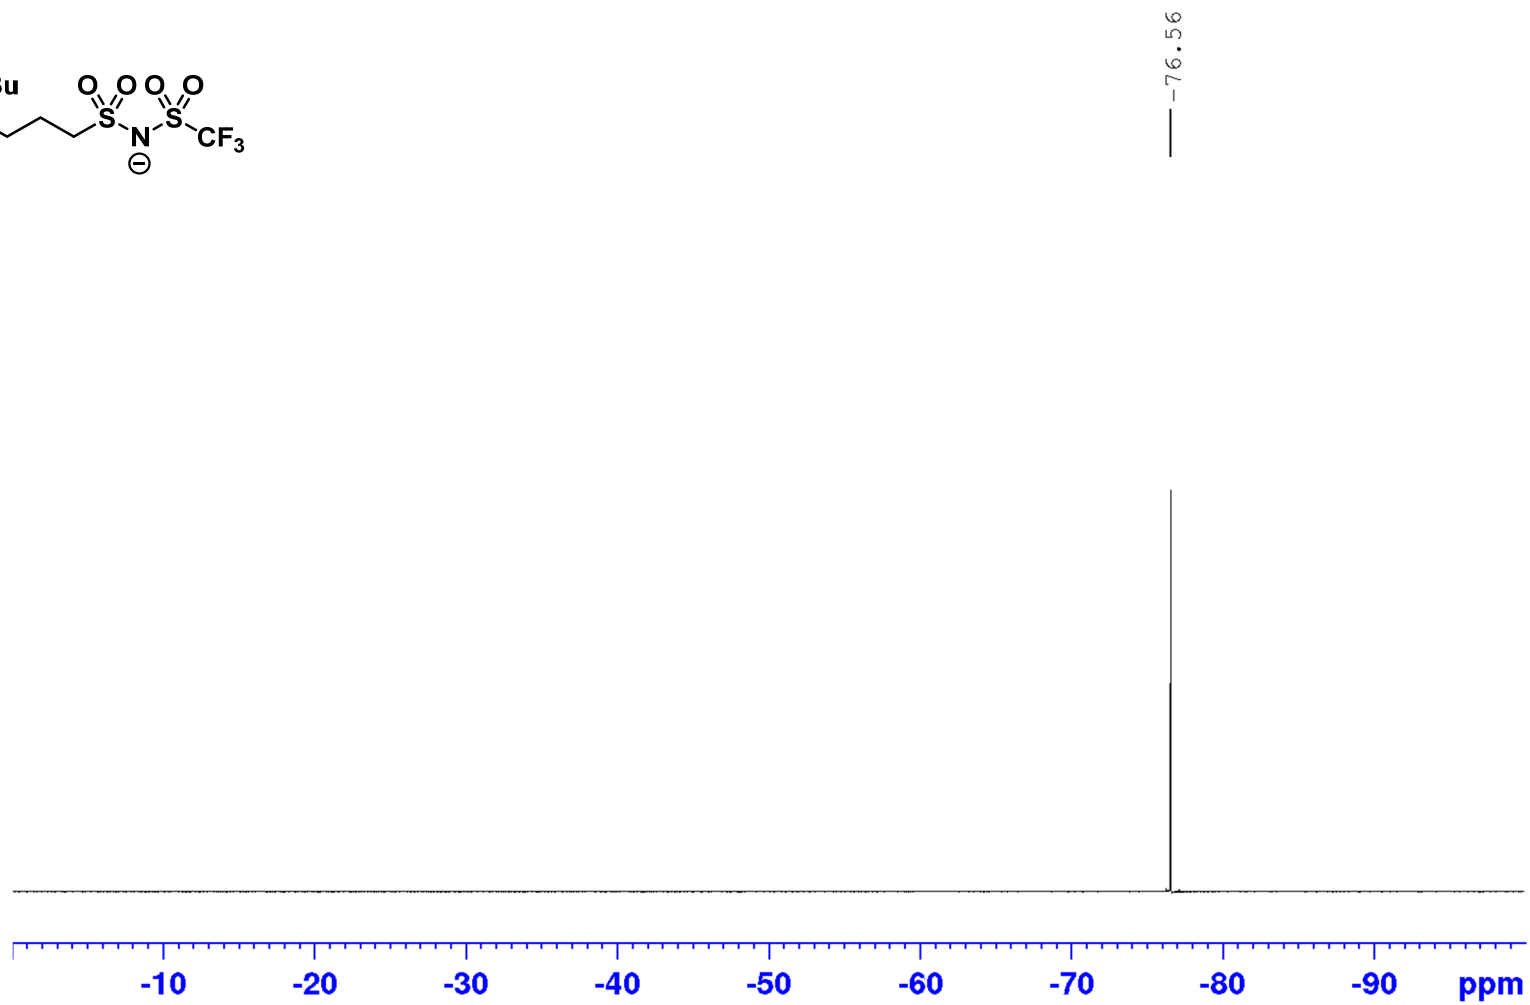

$^{13}\text{C}$  NMR spectrum of **ZIL 3d**

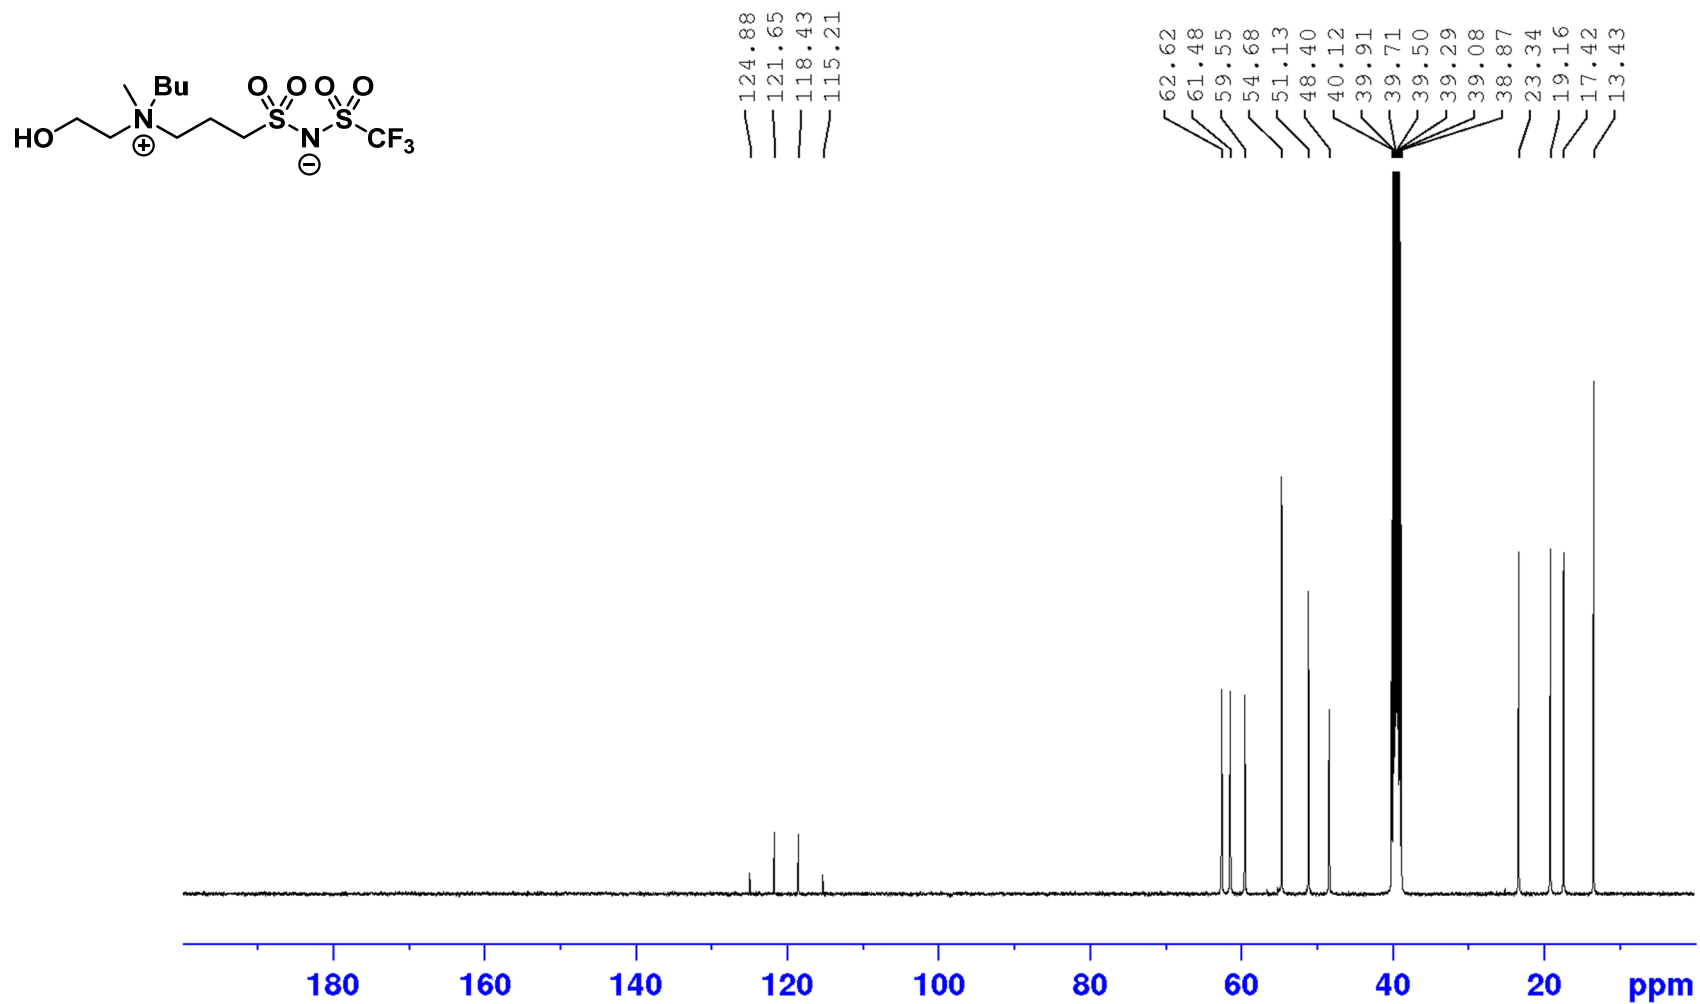

# Mass spectrum of ZIL 3d

Spectrum

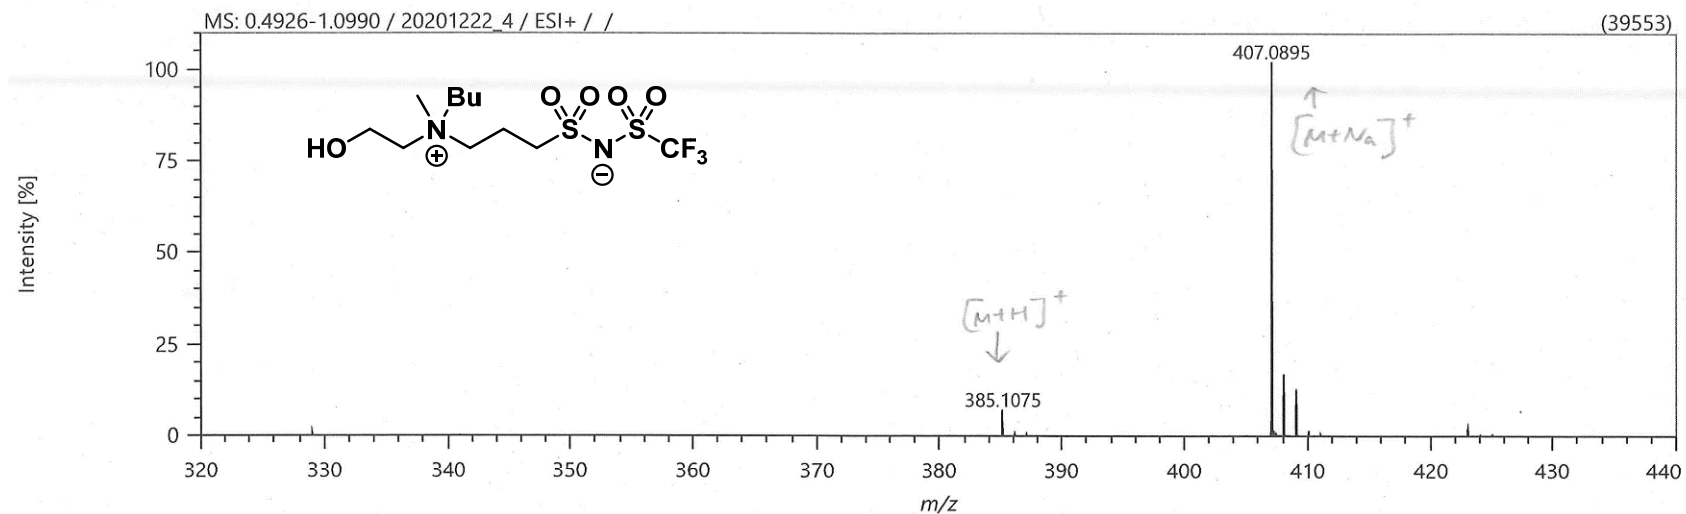

## Elemental Composition

Parameters

Tolerance:  $\pm 2.00$  ppm

Electron: Odd/Even

Charge: +1

DBE: -99.0 - 999.0

Elements Set 1:

| Symbol | C   | H    | F | N | O | S | Na |
|--------|-----|------|---|---|---|---|----|
| Min    | 0   | 0    | 3 | 2 | 5 | 2 | 0  |
| Max    | 400 | 1000 | 3 | 2 | 5 | 2 | 1  |

## Results

| Mass      | Formula                                                                                        | Calculated Mass | Mass Difference [mDa] | Mass Difference [ppm] | DBE  |
|-----------|------------------------------------------------------------------------------------------------|-----------------|-----------------------|-----------------------|------|
| 385.10747 | C <sub>11</sub> H <sub>24</sub> N <sub>2</sub> O <sub>5</sub> F <sub>3</sub> S <sub>2</sub>    | 385.10732       | 0.14                  | 0.38                  | -0.5 |
| 407.08946 | C <sub>11</sub> H <sub>23</sub> N <sub>2</sub> O <sub>5</sub> F <sub>3</sub> Na S <sub>2</sub> | 407.08927       | 0.19                  | 0.46                  | -0.5 |

$^1\text{H}$  NMR spectrum of **ZIL 3d-ene**

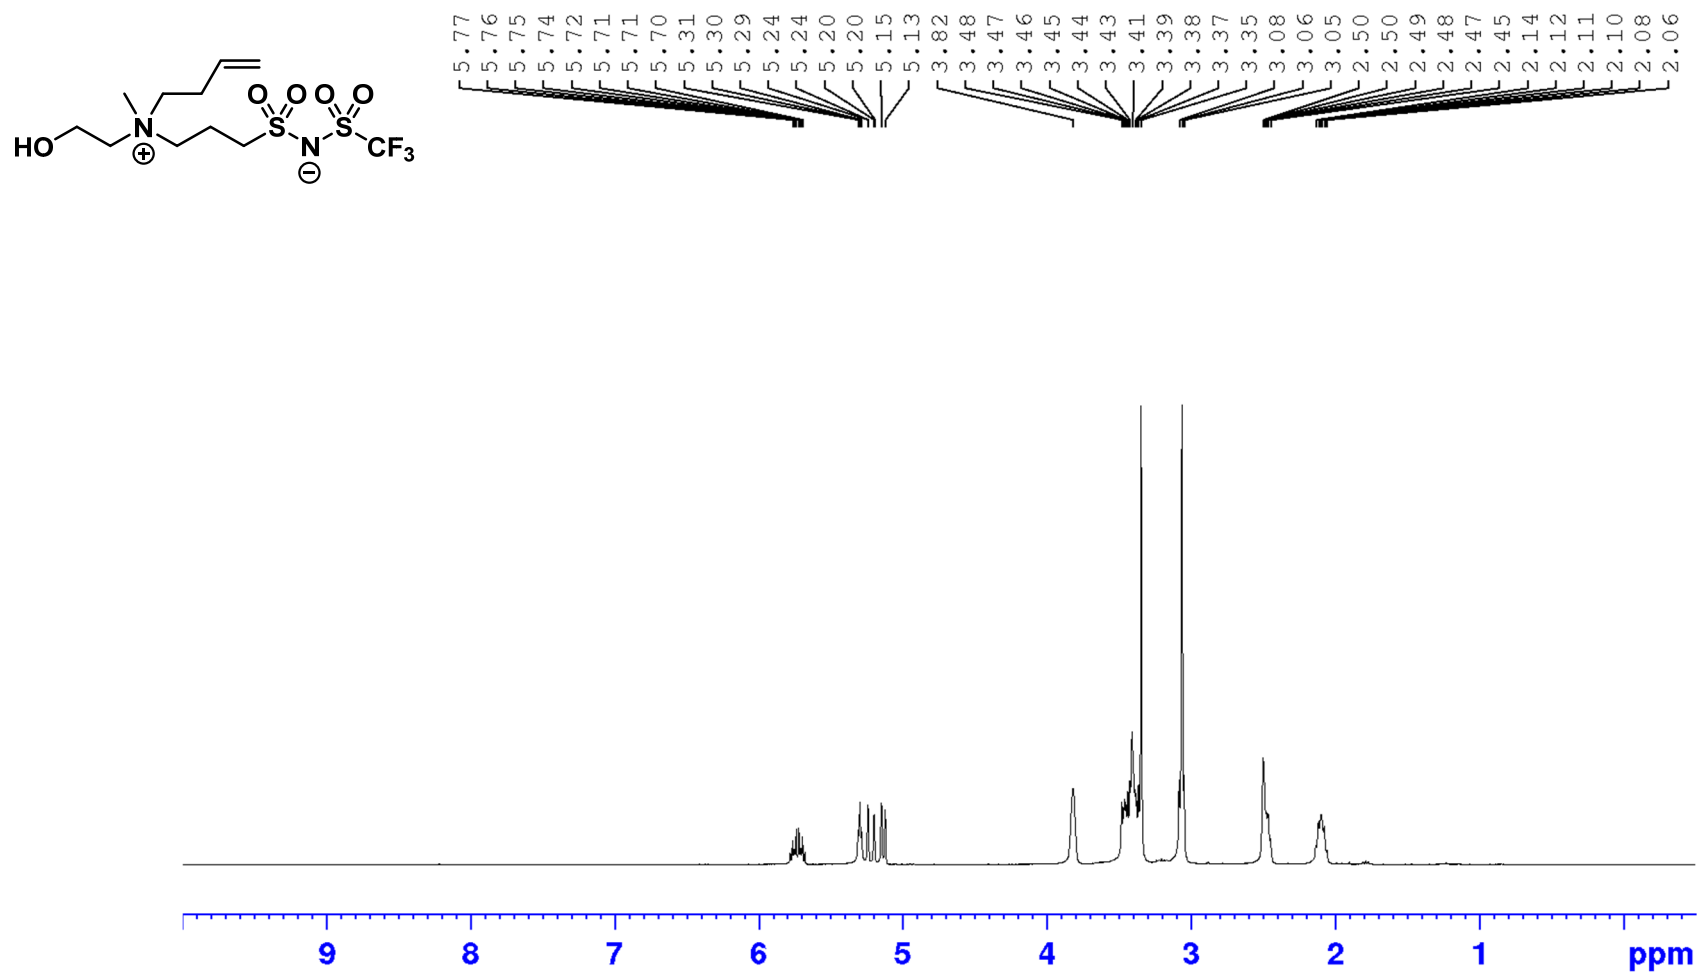

$^{19}\text{F}$  NMR spectrum of **ZIL 3d-ene**

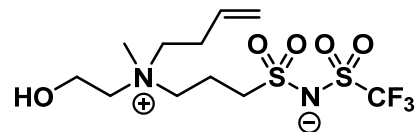

— -76.55

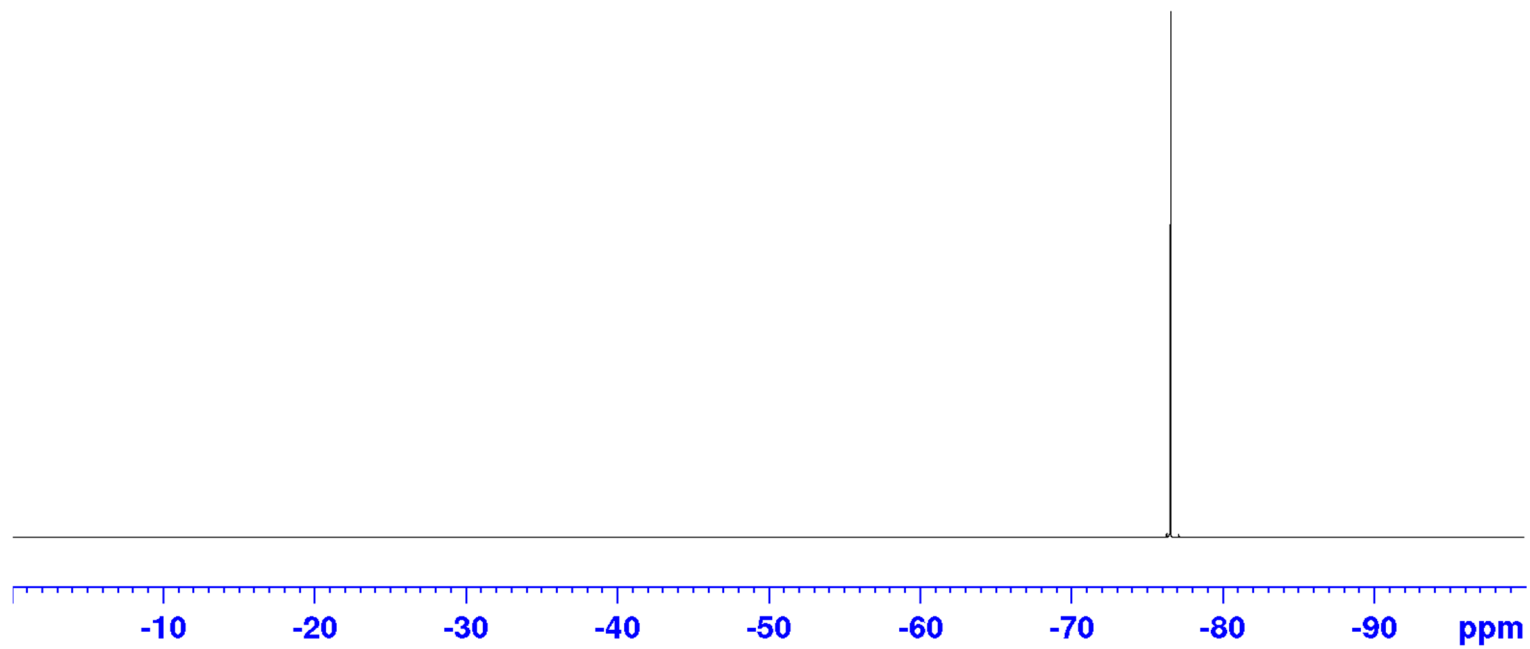

$^{13}\text{C}$  NMR spectrum of **ZIL 3d-ene**

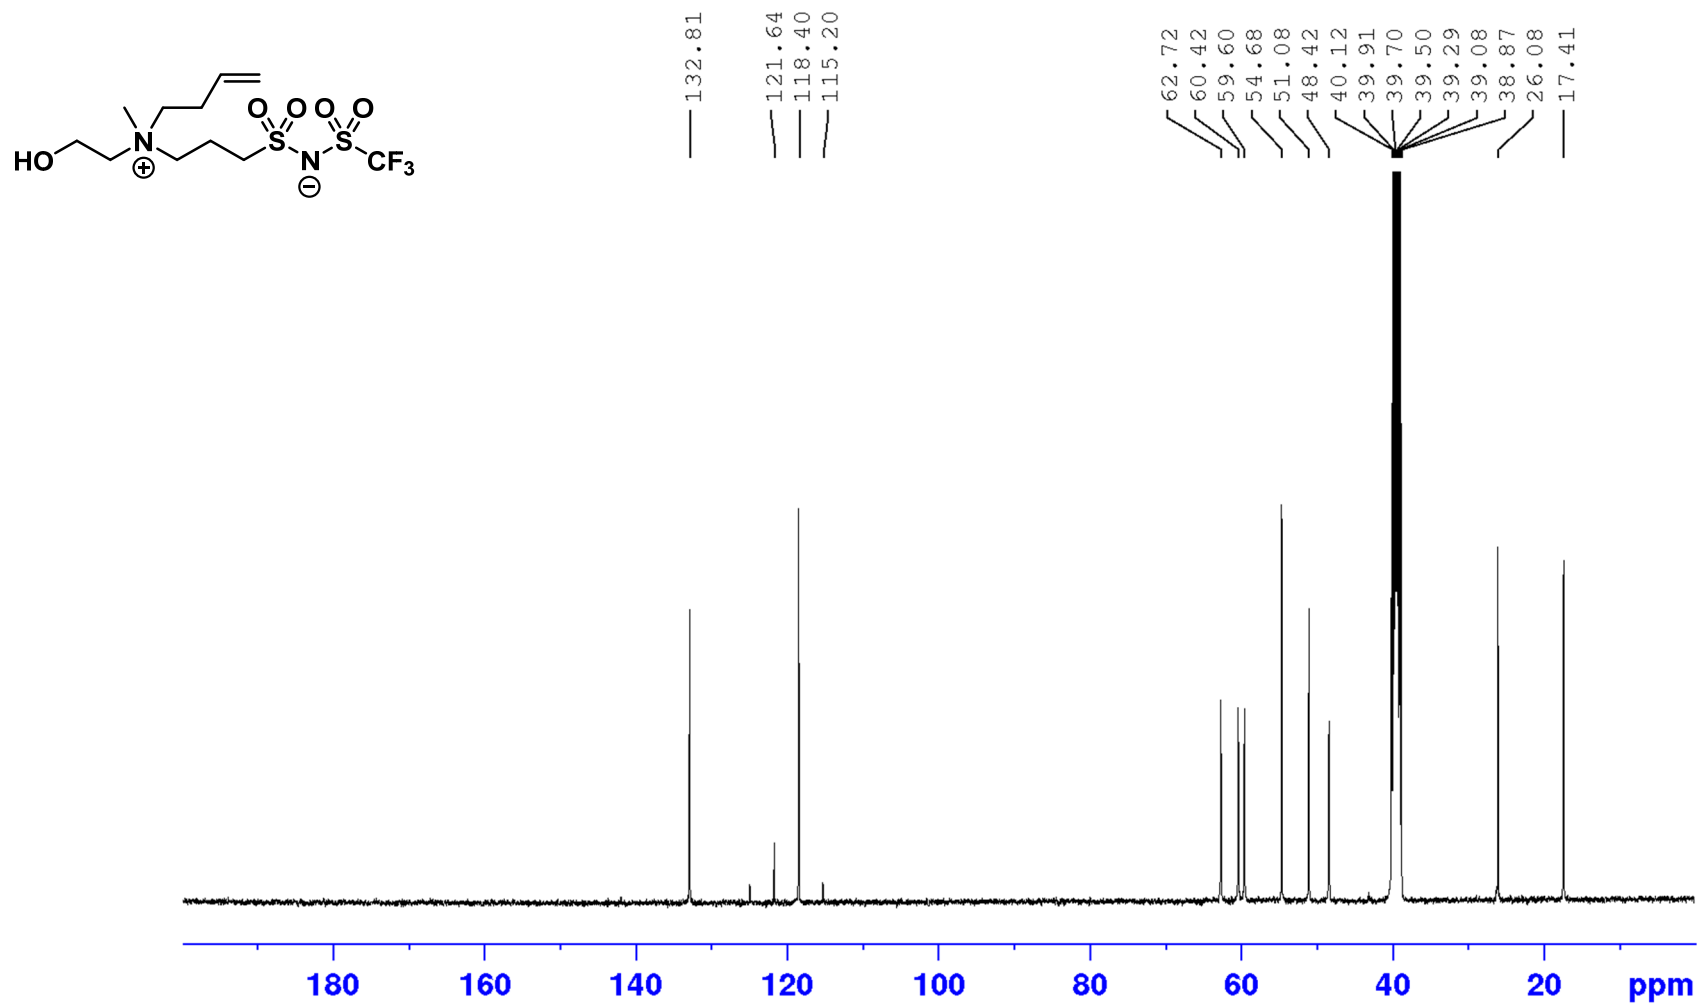

# Mass spectrum of ZIL 3d-ene

Spectrum

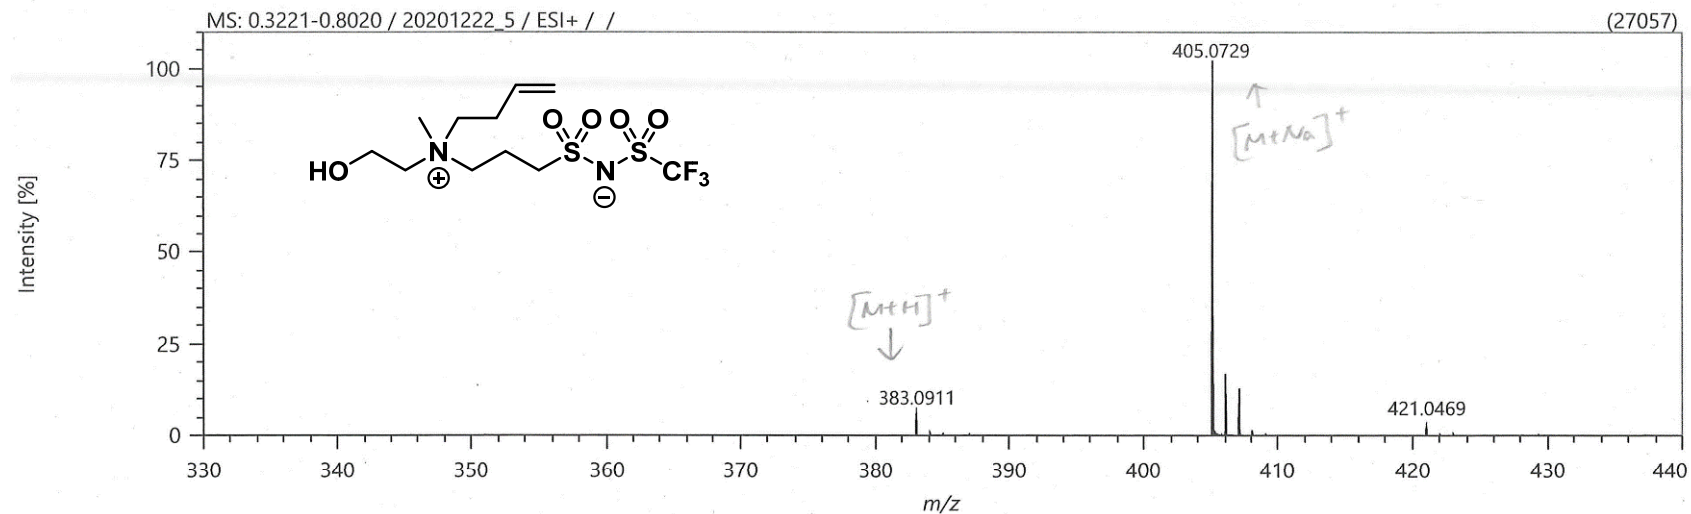

## Elemental Composition

Parameters

Tolerance:  $\pm 2.00$  ppm  
 Electron: Odd/Even  
 Charge: +1  
 DBE: -99.0 - 999.0

Elements Set 1:

| Symbol | C   | H    | F | N | O | S | Na |
|--------|-----|------|---|---|---|---|----|
| Min    | 0   | 0    | 3 | 2 | 5 | 2 | 0  |
| Max    | 400 | 1000 | 3 | 2 | 5 | 2 | 1  |

## Results

| Mass      | Formula                                                                                        | Calculated Mass | Mass Difference [mDa] | Mass Difference [ppm] | DBE |
|-----------|------------------------------------------------------------------------------------------------|-----------------|-----------------------|-----------------------|-----|
| 383.09109 | C <sub>11</sub> H <sub>22</sub> N <sub>2</sub> O <sub>5</sub> F <sub>3</sub> S <sub>2</sub>    | 383.09167       | -0.59                 | -1.53                 | 0.5 |
| 405.07295 | C <sub>11</sub> H <sub>21</sub> N <sub>2</sub> O <sub>5</sub> F <sub>3</sub> Na S <sub>2</sub> | 405.07362       | -0.67                 | -1.66                 | 0.5 |

$^1\text{H}$  NMR spectrum of **ZIL 3d-yne**

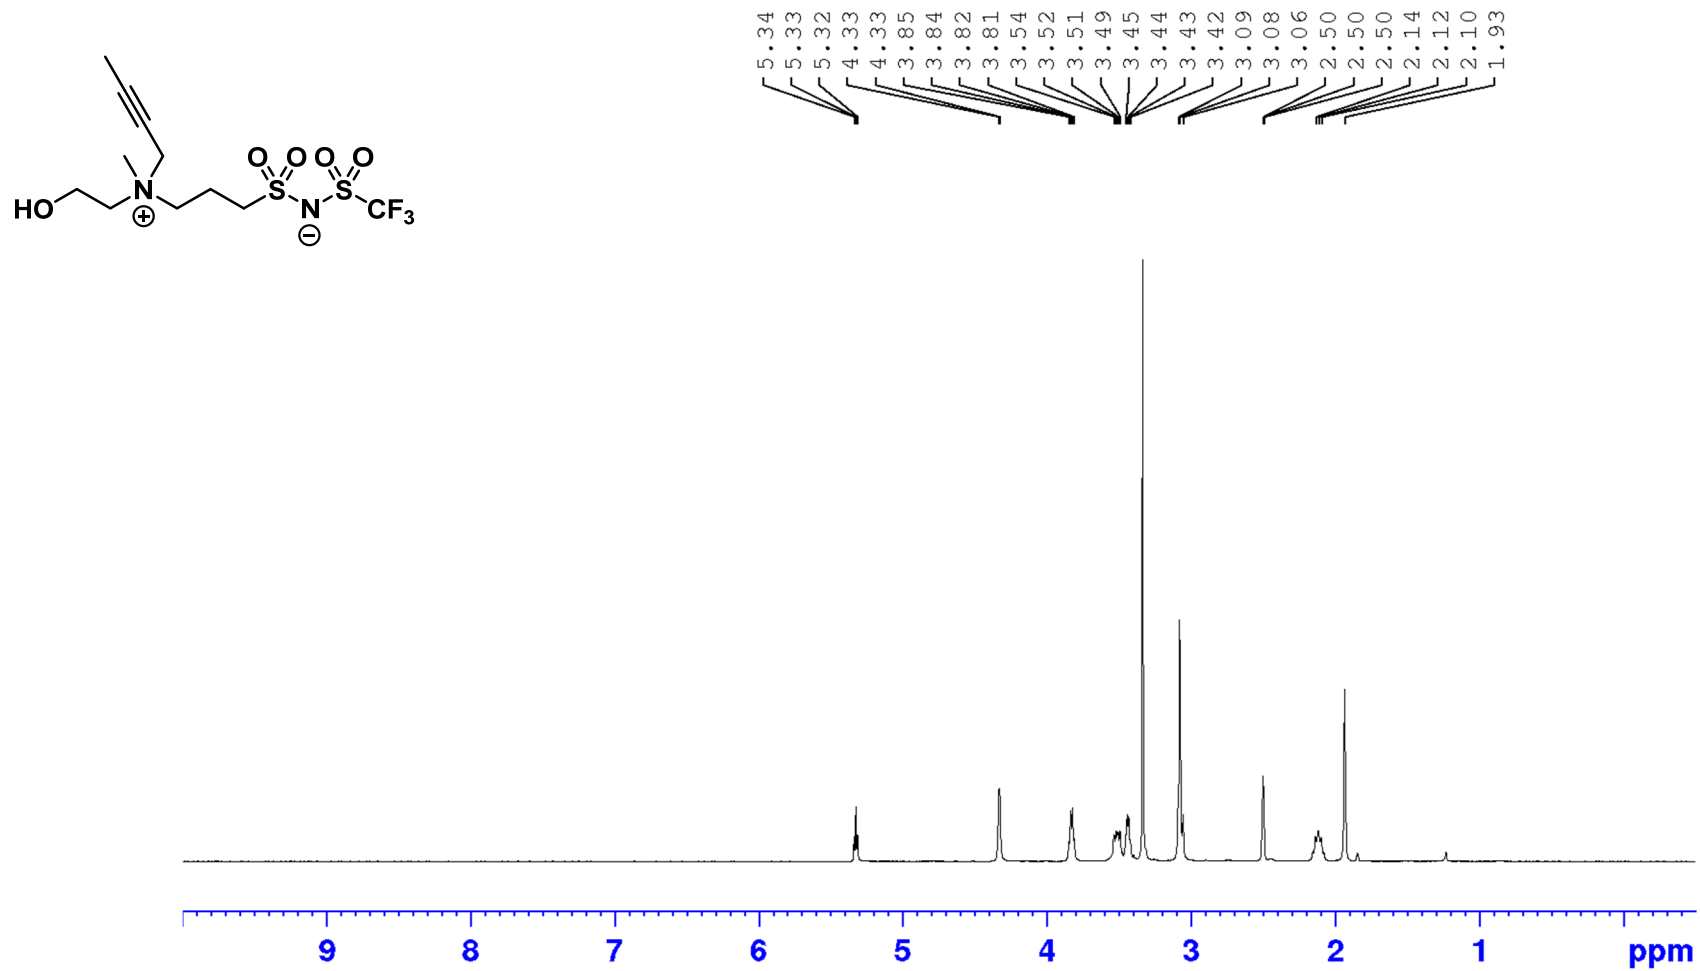

$^{19}\text{F}$  NMR spectrum of **ZIL 3d-yne**

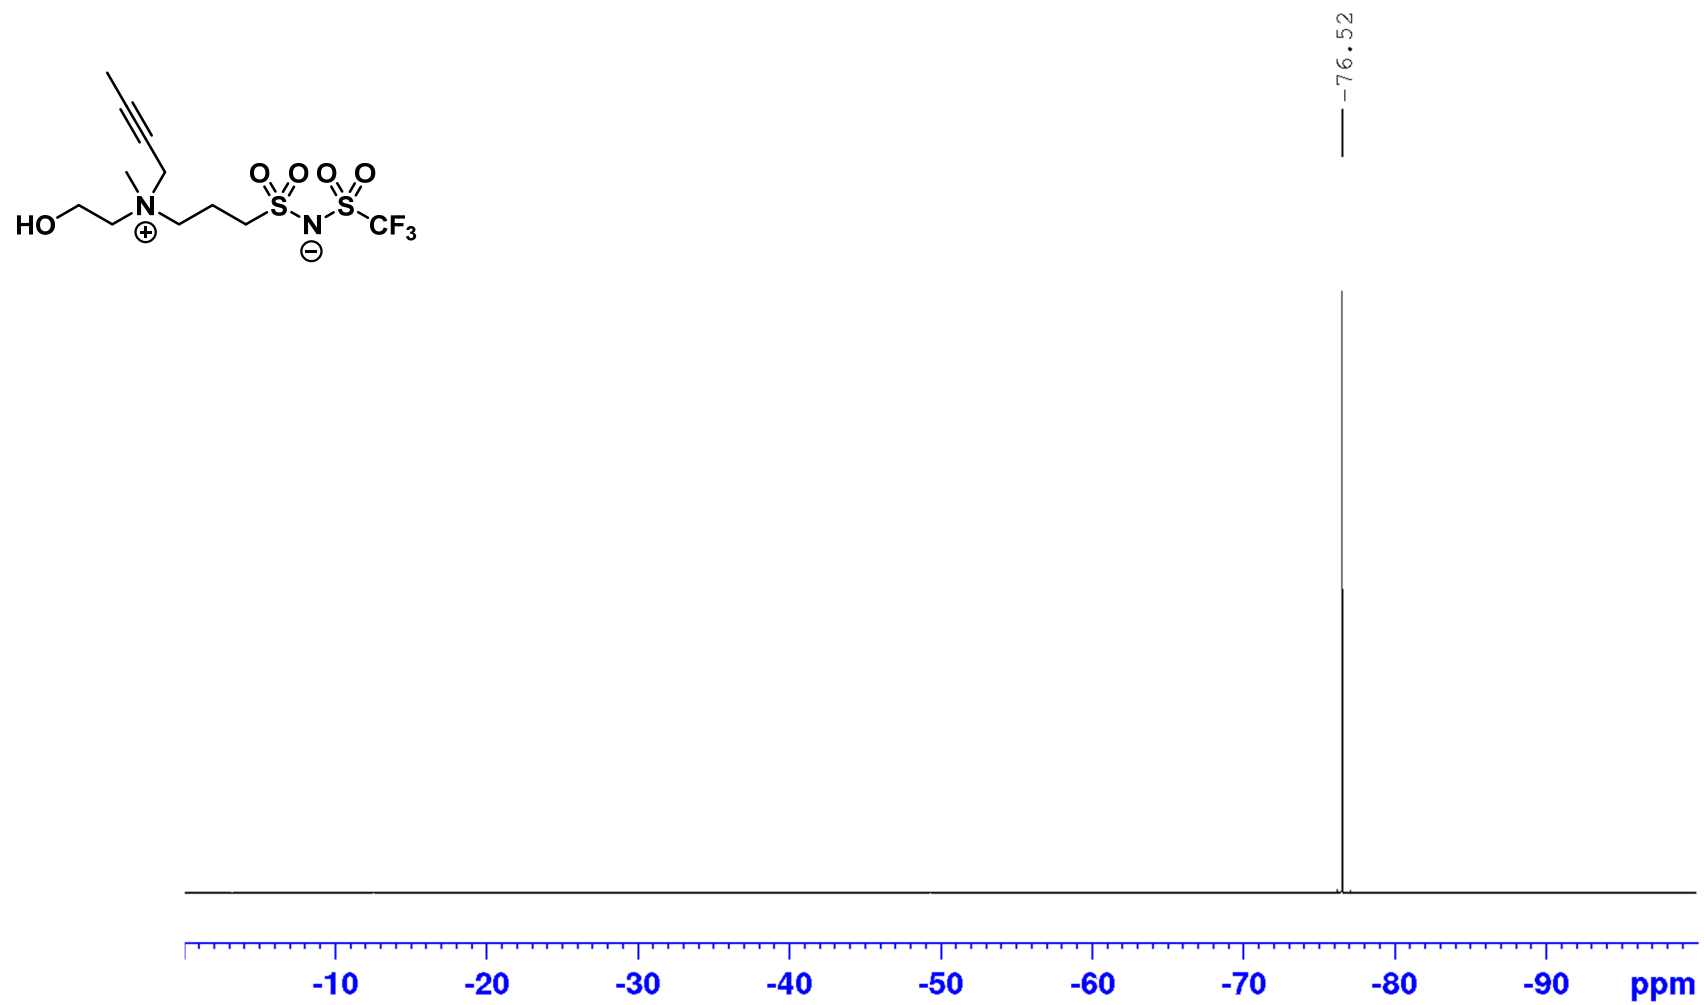

$^{13}\text{C}$  NMR spectrum of **ZIL 3d-yne**

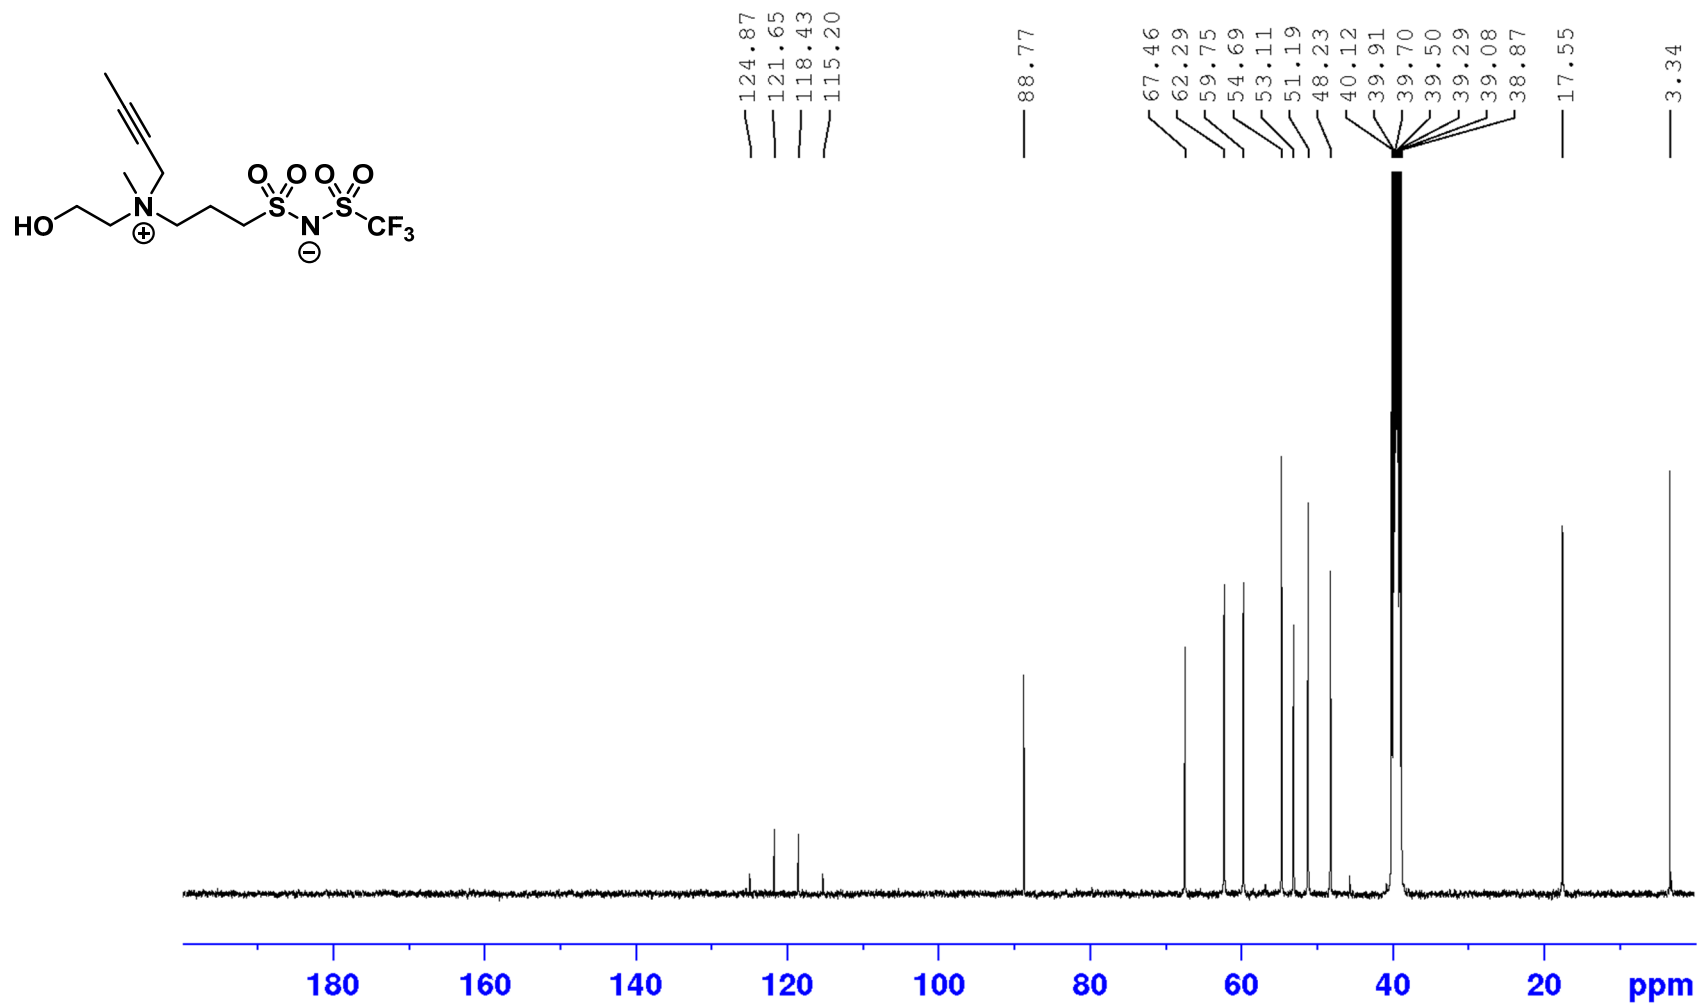

# Mass spectrum of ZIL 3d-yne

Spectrum

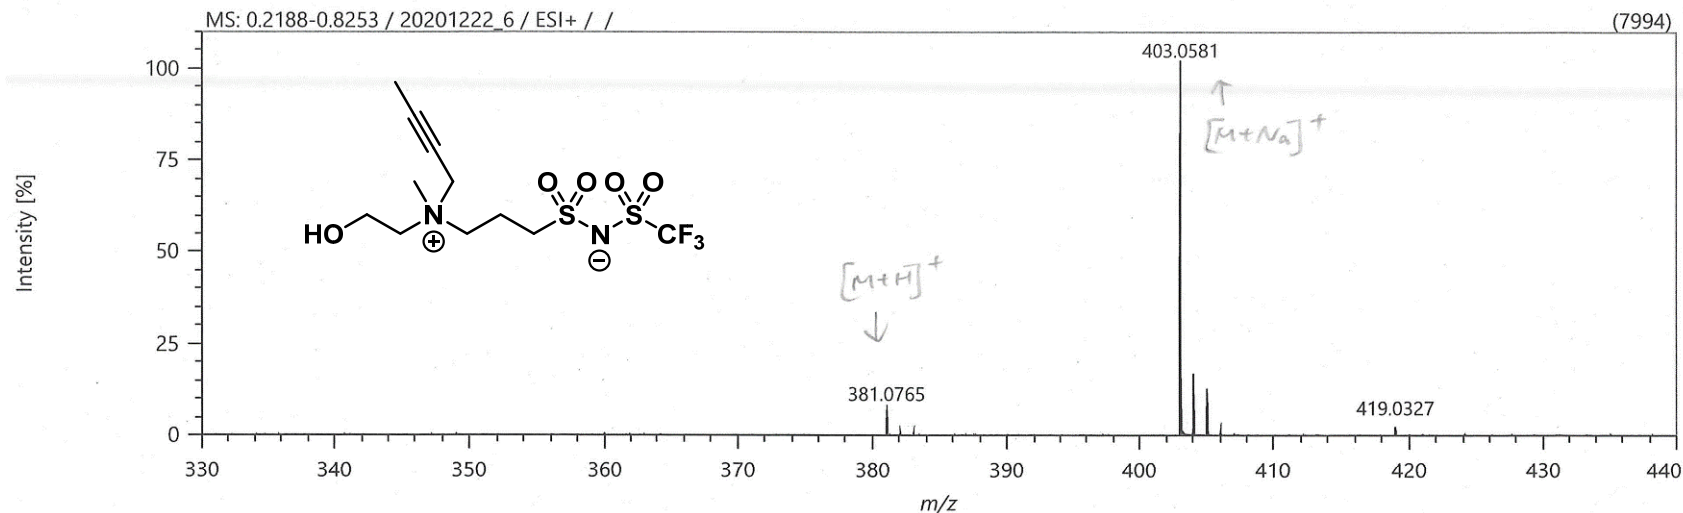

## Elemental Composition

Parameters

Tolerance:  $\pm 2.00$  ppm  
 Electron: Odd/Even  
 Charge: +1  
 DBE: -99.0 - 999.0

Elements Set 1:

| Symbol | C   | H    | F | N | O | S | Na |
|--------|-----|------|---|---|---|---|----|
| Min    | 0   | 0    | 3 | 2 | 5 | 2 | 0  |
| Max    | 400 | 1000 | 3 | 2 | 5 | 2 | 1  |

## Results

| Mass      | Formula                                                                                        | Calculated Mass | Mass Difference [mDa] | Mass Difference [ppm] | DBE |
|-----------|------------------------------------------------------------------------------------------------|-----------------|-----------------------|-----------------------|-----|
| 381.07652 | C <sub>11</sub> H <sub>20</sub> N <sub>2</sub> O <sub>5</sub> F <sub>3</sub> S <sub>2</sub>    | 381.07602       | 0.50                  | 1.30                  | 1.5 |
| 403.05810 | C <sub>11</sub> H <sub>19</sub> N <sub>2</sub> O <sub>5</sub> F <sub>3</sub> Na S <sub>2</sub> | 403.05797       | 0.13                  | 0.32                  | 1.5 |

$^1\text{H}$  NMR spectrum of **ZIL 3e**

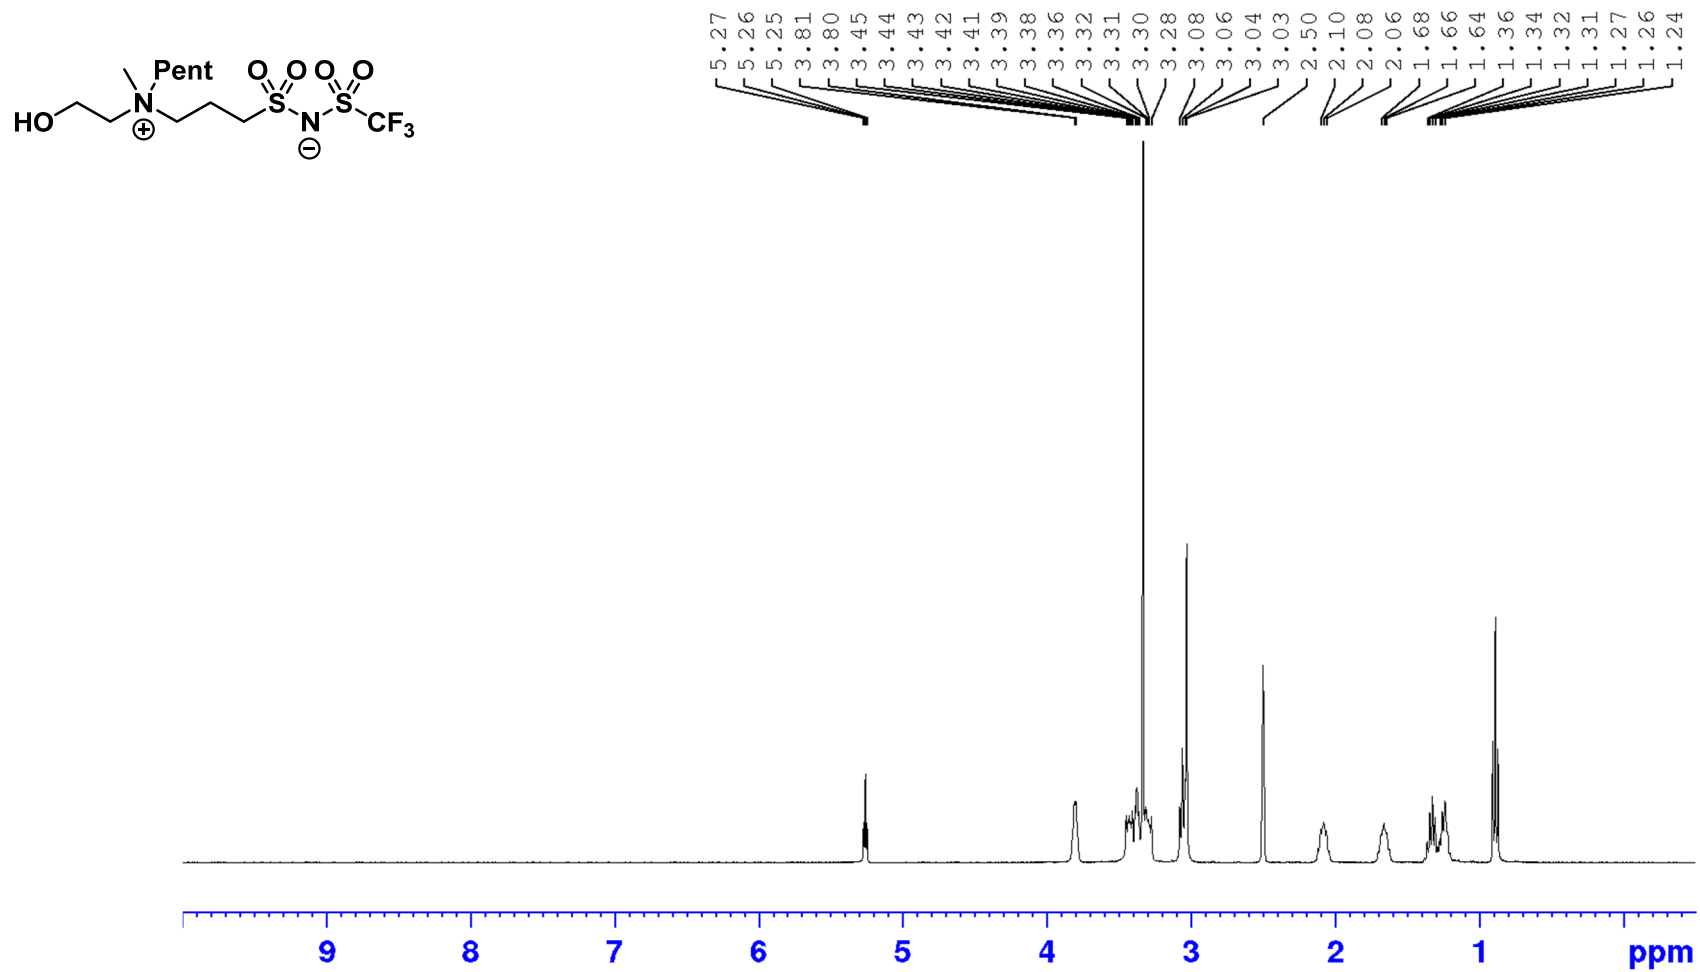

$^{19}\text{F}$  NMR spectrum of **ZIL 3e**

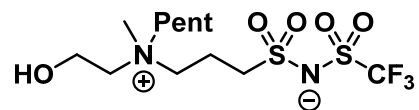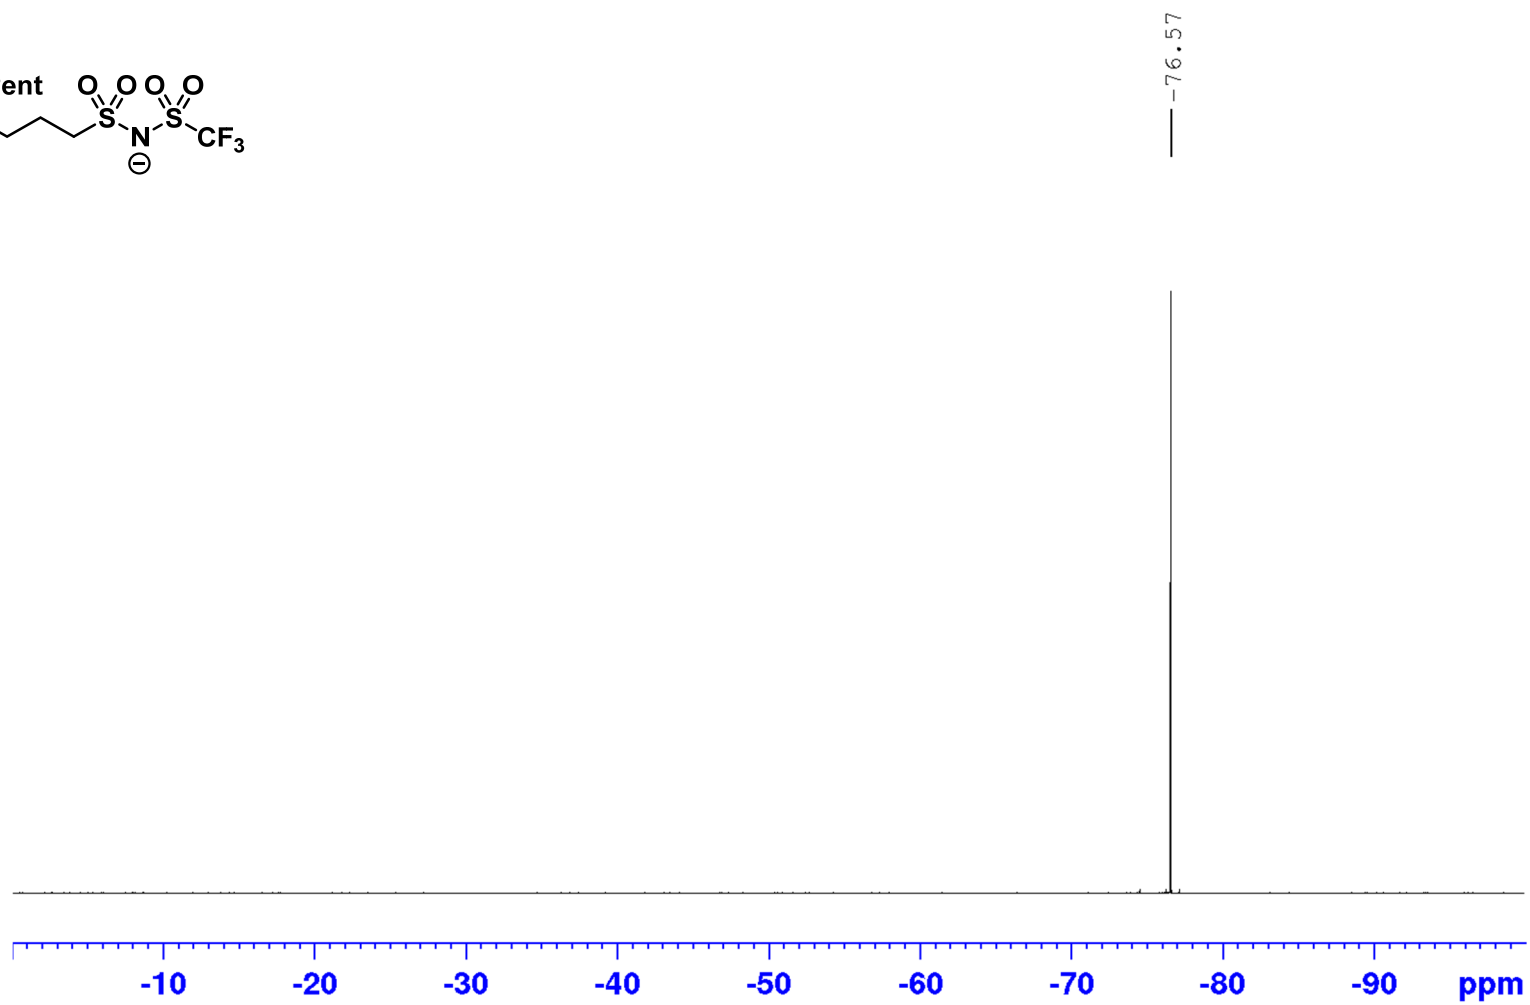

$^{13}\text{C}$  NMR spectrum of **ZIL 3e**

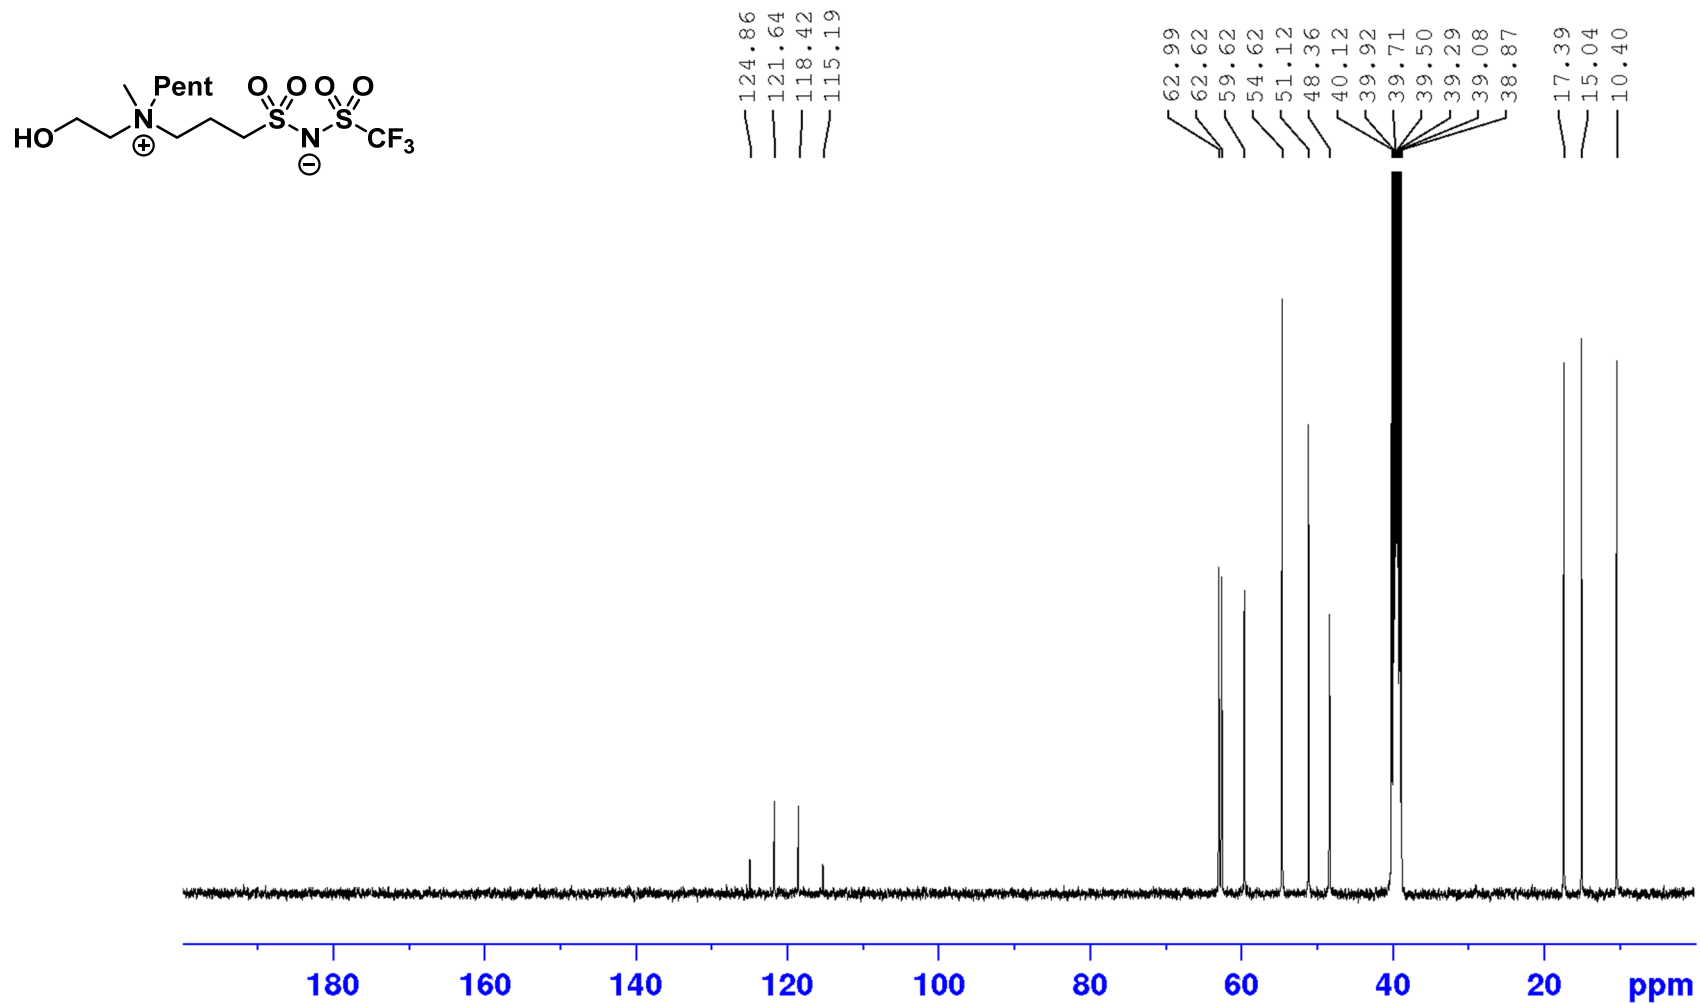

# Mass spectrum of ZIL 3e

Spectrum

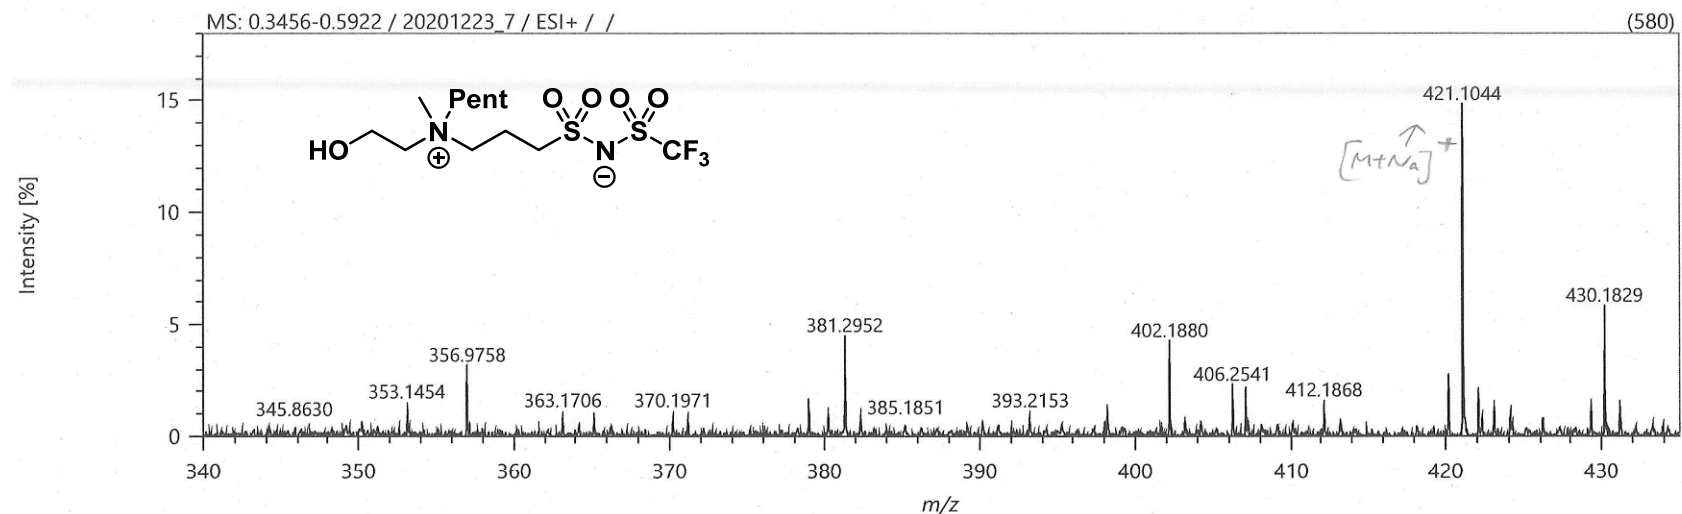

## Elemental Composition

Parameters

Tolerance:  $\pm 2.00$  ppm  
 Electron: Odd/Even  
 Charge: +1  
 DBE: -99.0 - 999.0

Elements Set 1:

| Symbol | C   | H    | F | N | O | S | Na |
|--------|-----|------|---|---|---|---|----|
| Min    | 0   | 0    | 3 | 2 | 5 | 2 | 0  |
| Max    | 400 | 1000 | 3 | 2 | 5 | 2 | 1  |

## Results

| Mass      | Formula                                                                                        | Calculated Mass | Mass Difference [mDa] | Mass Difference [ppm] | DBE  |
|-----------|------------------------------------------------------------------------------------------------|-----------------|-----------------------|-----------------------|------|
| 398.17931 |                                                                                                |                 |                       |                       |      |
| 421.10436 | C <sub>12</sub> H <sub>25</sub> N <sub>2</sub> O <sub>5</sub> F <sub>3</sub> Na S <sub>2</sub> | 421.10492       | -0.55                 | -1.32                 | -0.5 |

$^1\text{H}$  NMR spectrum of **ZIL 3f**

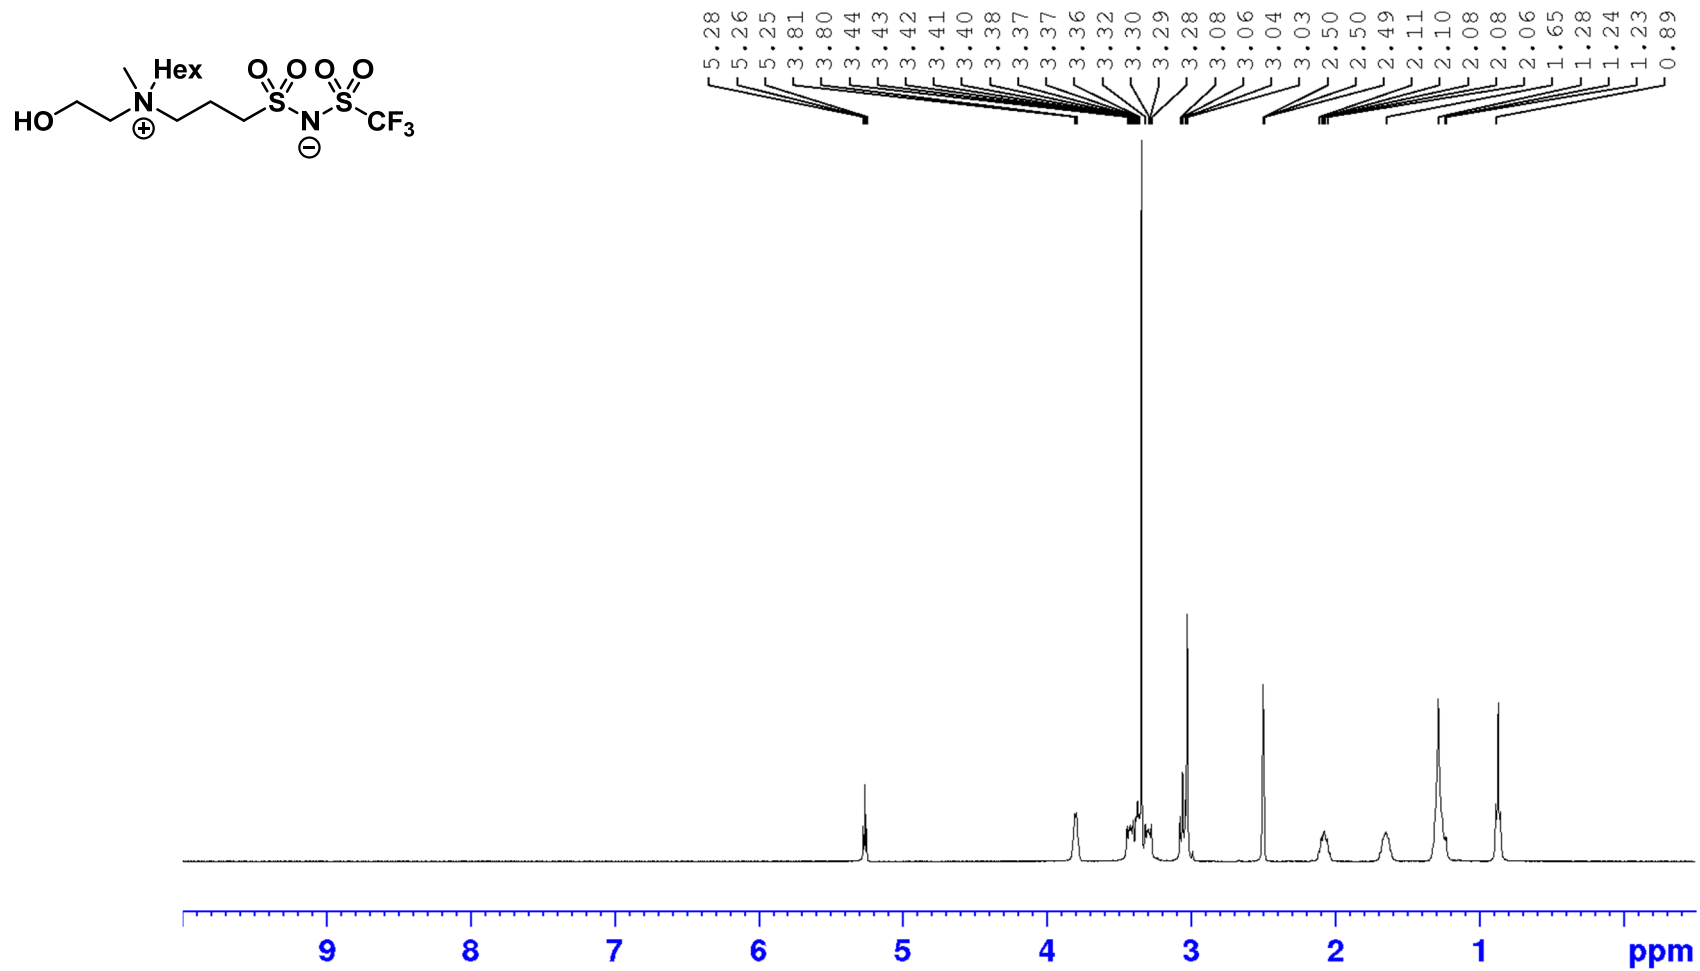

$^{19}\text{F}$  NMR spectrum of **ZIL 3f**

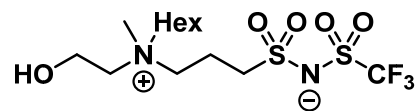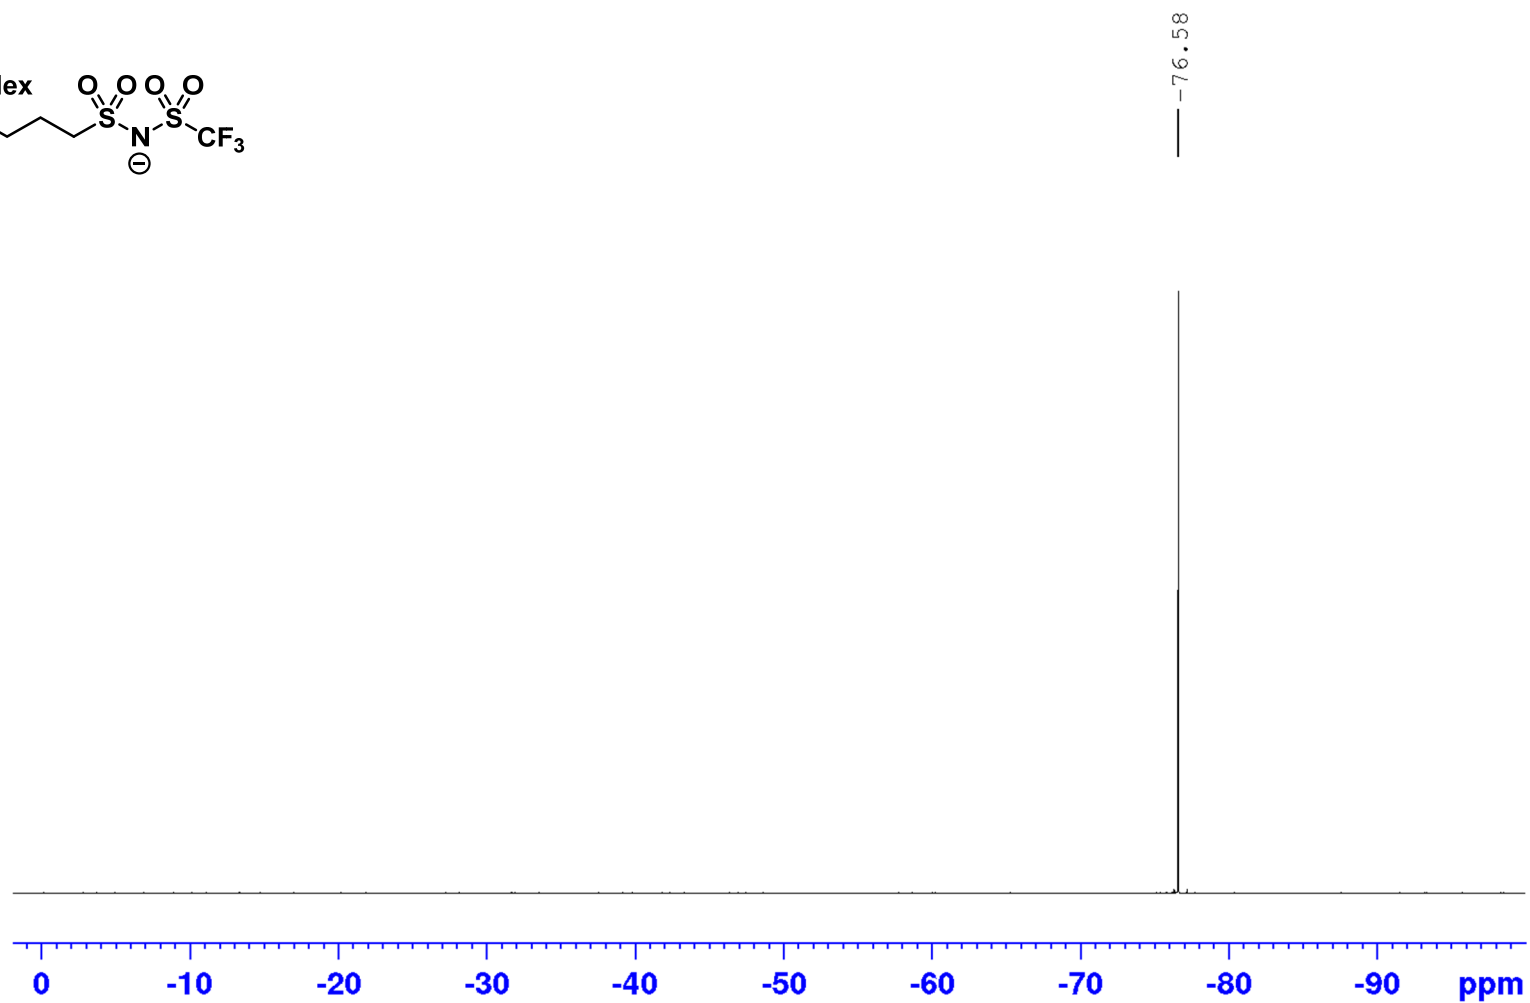

$^{13}\text{C}$  NMR spectrum of **ZIL 3f**

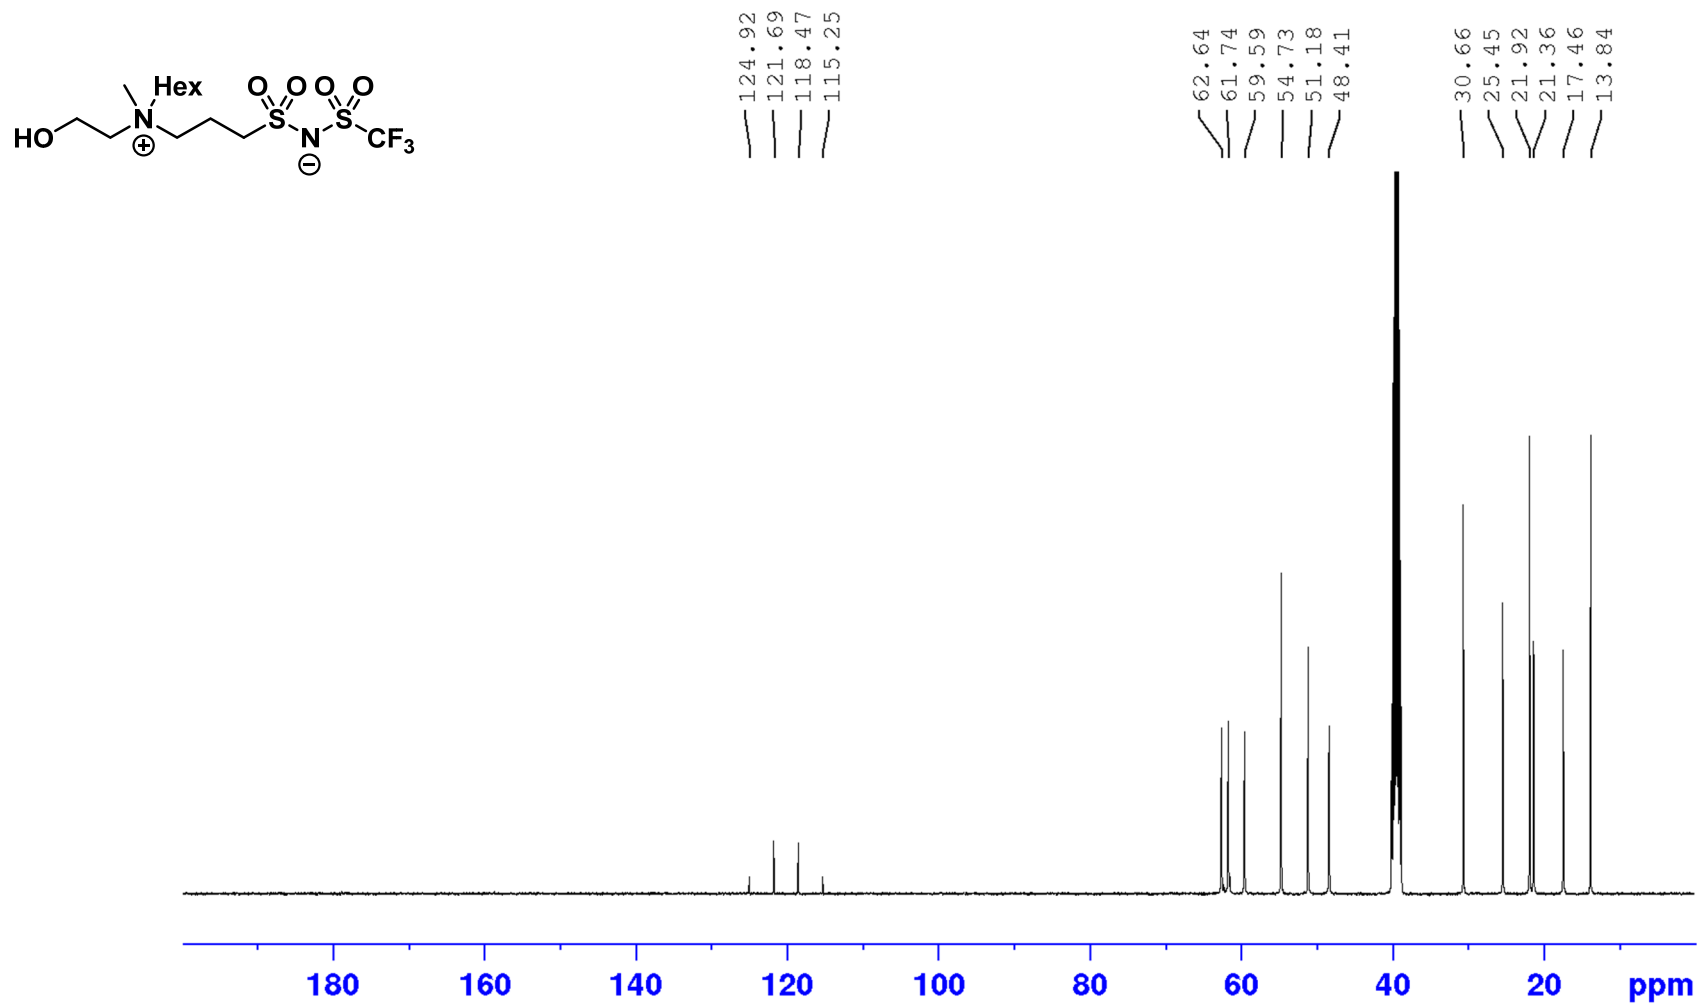

## Mass spectrum of ZIL 3f

Spectrum

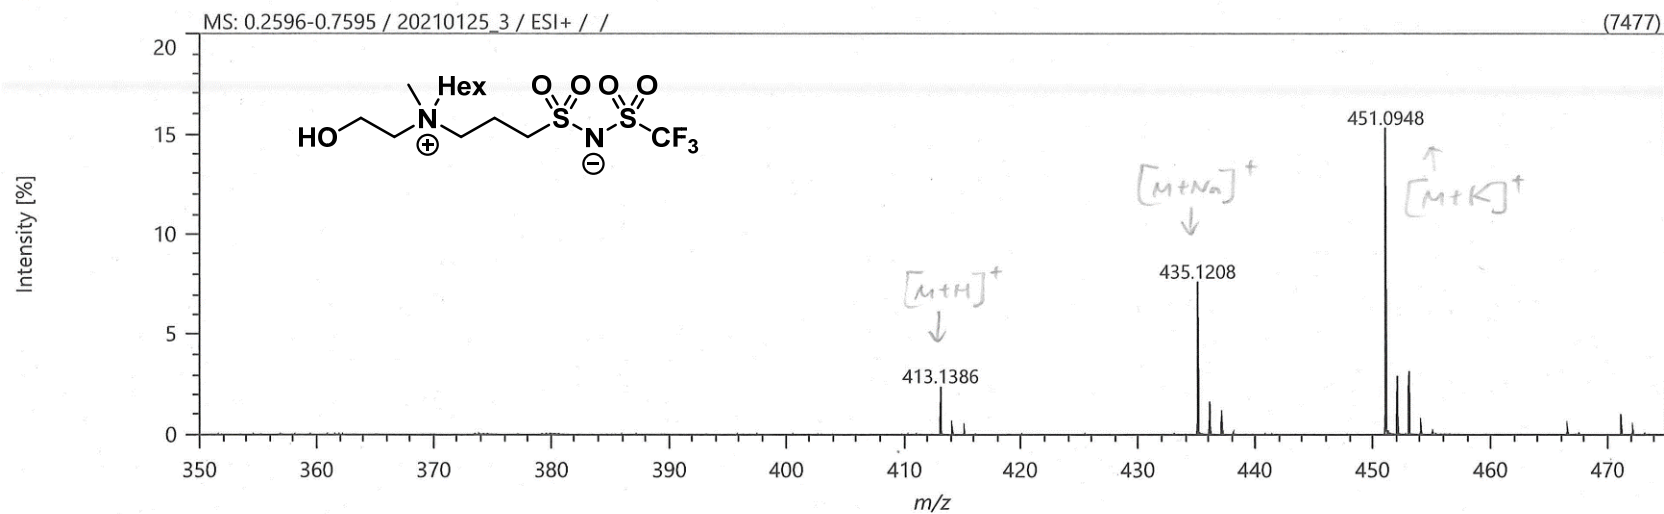

### Elemental Composition

Parameters

Tolerance:  $\pm 3.00$  ppm  
 Electron: Odd/Even  
 Charge: +1  
 DBE: -99.0 - 999.0

Elements Set 1:

| Symbol | C   | H    | N | O | S | F | Na | K |
|--------|-----|------|---|---|---|---|----|---|
| Min    | 0   | 0    | 2 | 5 | 2 | 3 | 0  | 0 |
| Max    | 400 | 1000 | 2 | 5 | 2 | 3 | 1  | 1 |

### Results

| Mass      | Formula                | Calculated Mass | Mass Difference [mDa] | Mass Difference [ppm] | DBE  |
|-----------|------------------------|-----------------|-----------------------|-----------------------|------|
| 413.13861 | C13 H28 N2 O5 F3 S2    | 413.13862       | -0.01                 | -0.02                 | -0.5 |
| 435.12075 | C13 H27 N2 O5 F3 Na S2 | 435.12057       | 0.19                  | 0.43                  | -0.5 |
| 451.09483 | C13 H27 N2 O5 F3 S2 K  | 451.09451       | 0.33                  | 0.73                  | -0.5 |

$^1\text{H}$  NMR spectrum of **ZIL 4a**

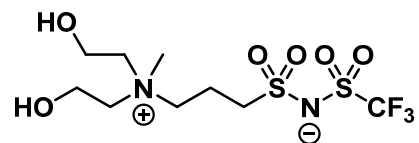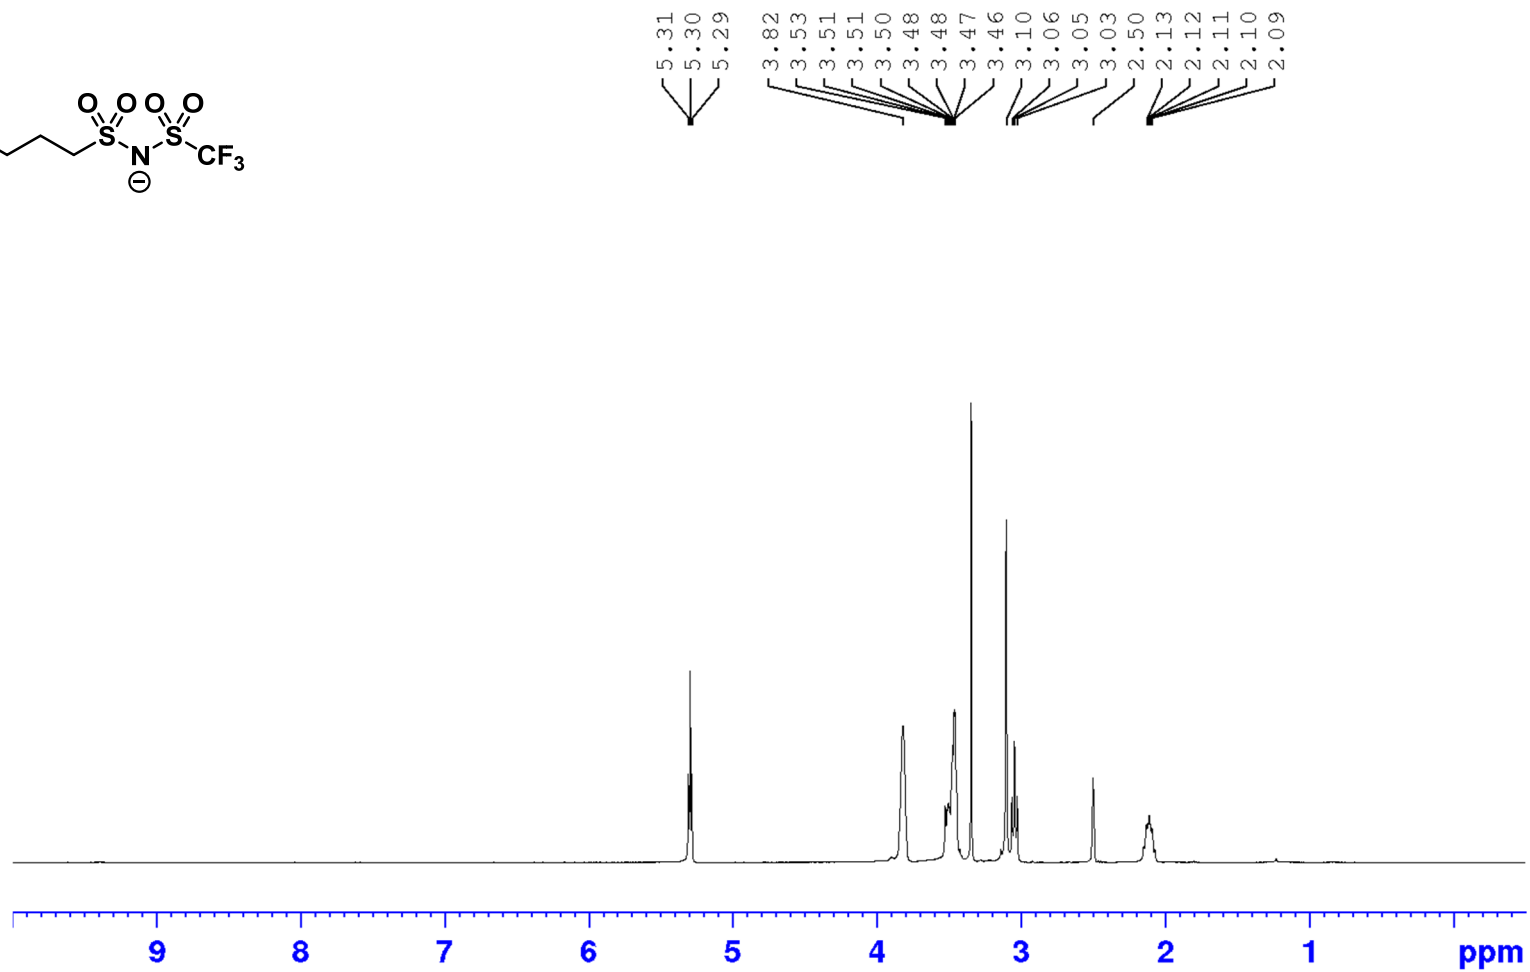

$^{19}\text{F}$  NMR spectrum of **ZIL 4a**

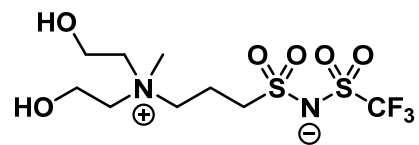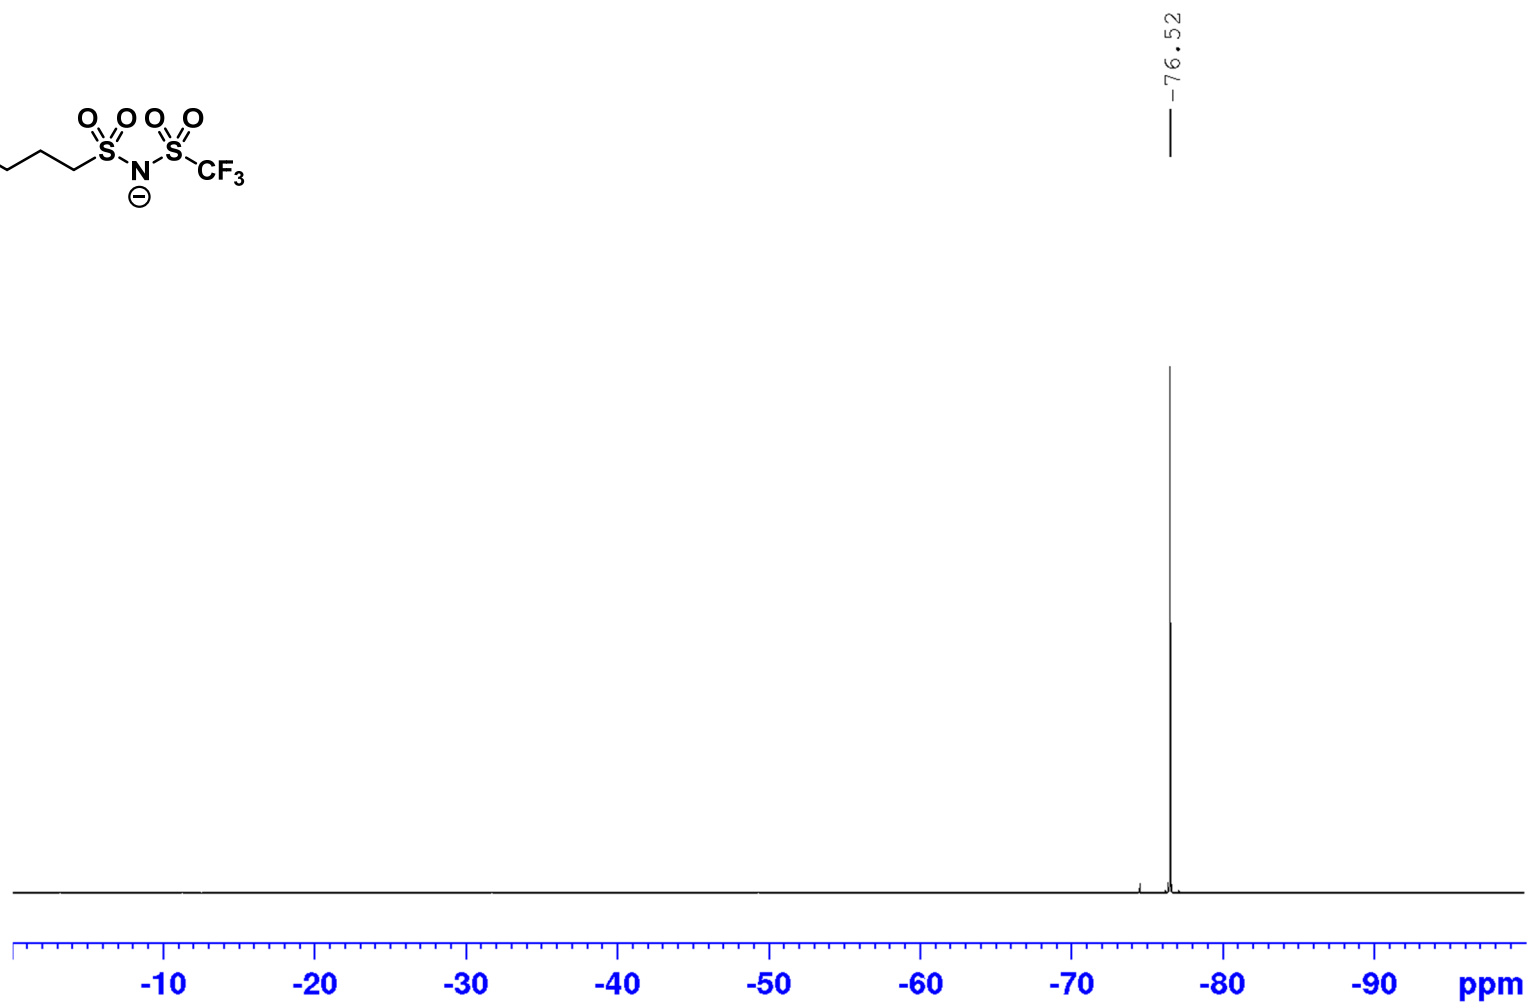

$^{13}\text{C}$  NMR spectrum of **ZIL 4a**

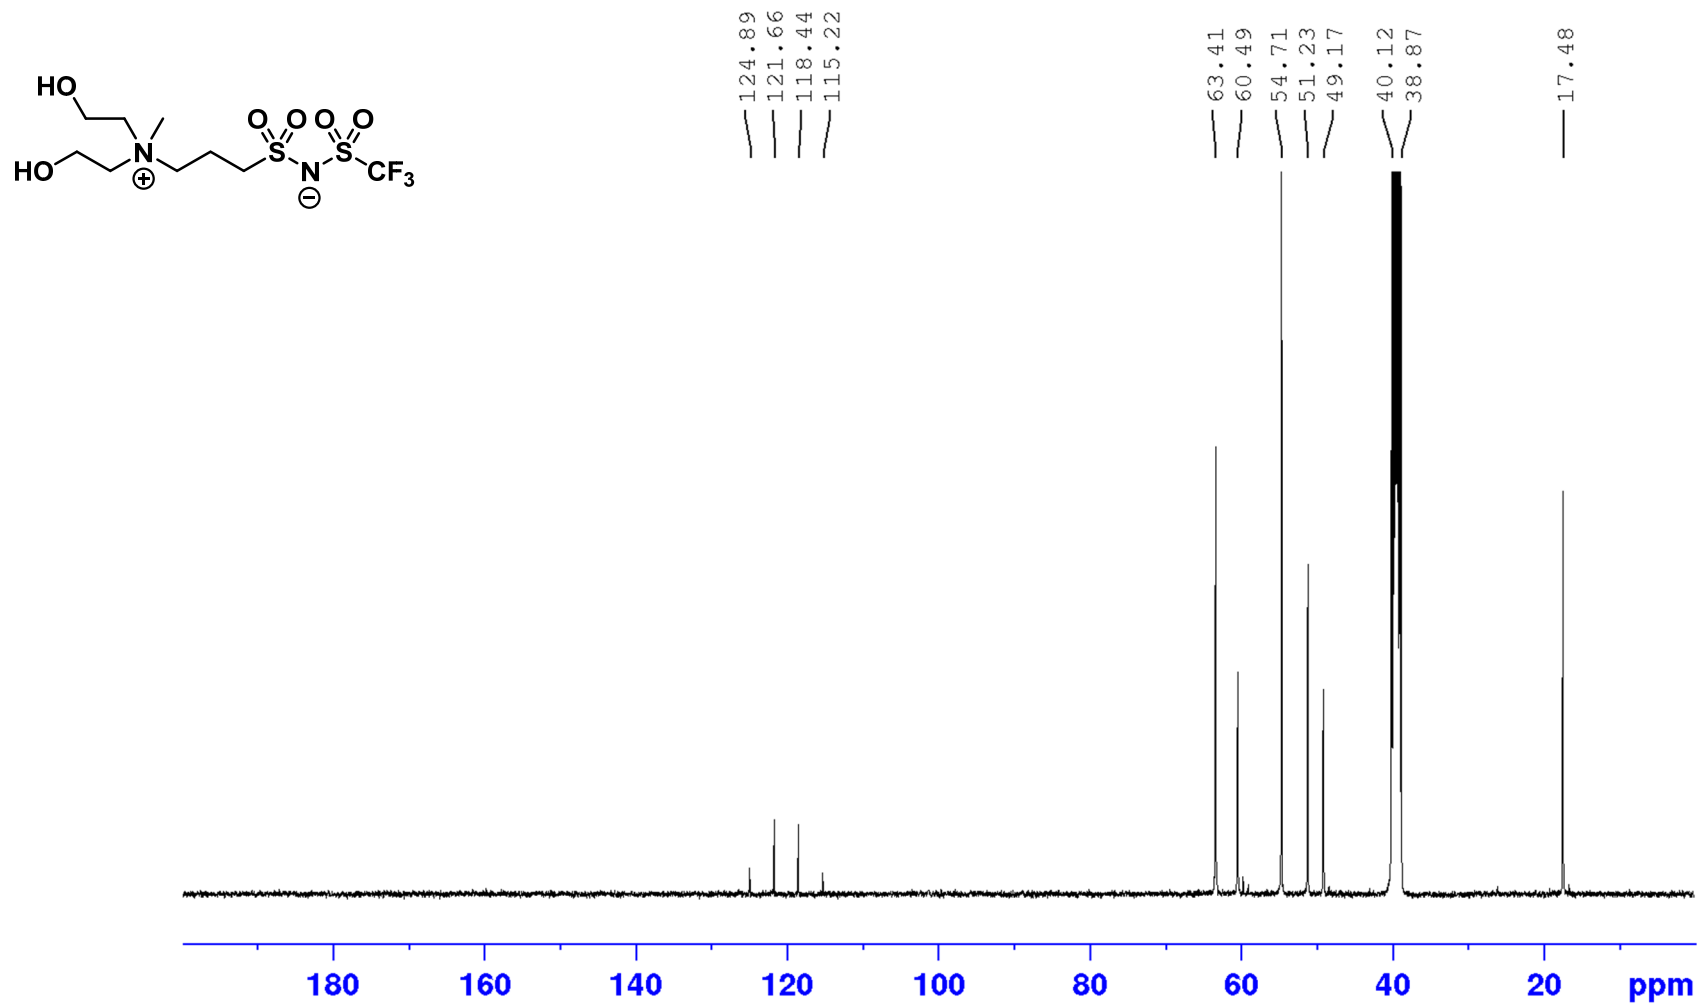

# Mass spectrum of ZIL 4a

Spectrum

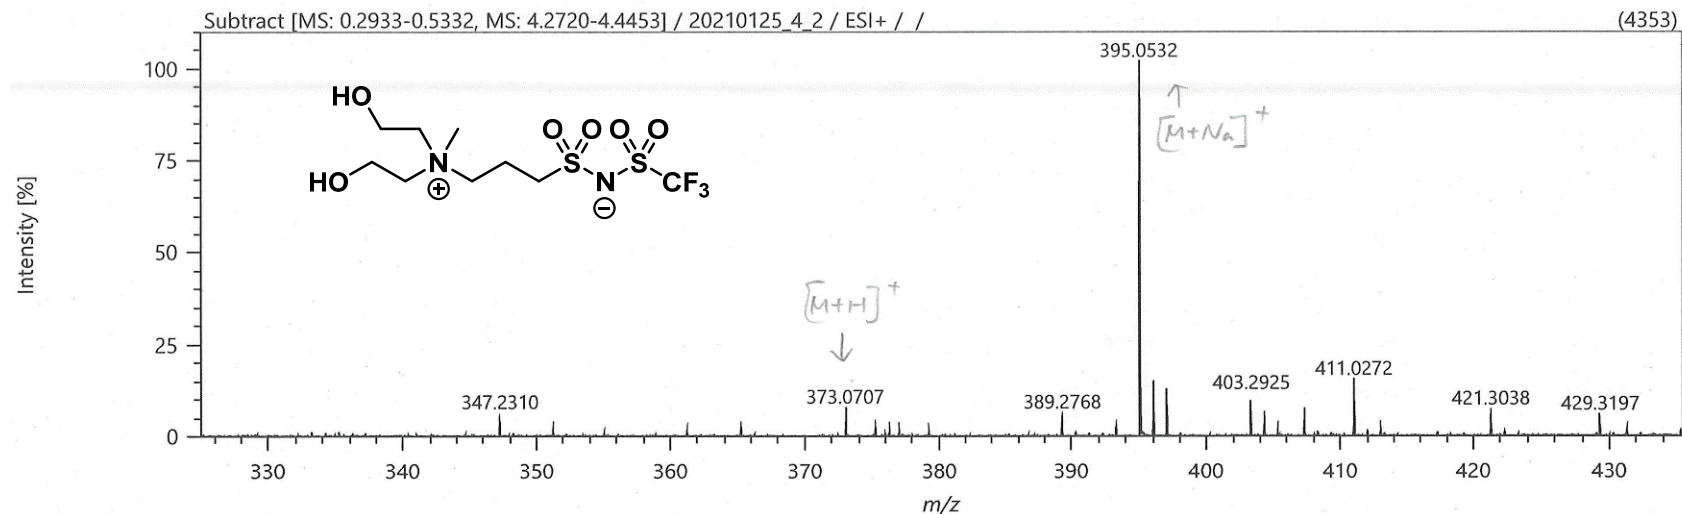

## Elemental Composition

Parameters

Tolerance:  $\pm 2.00$  ppm  
 Electron: Odd/Even  
 Charge: +1  
 DBE: -99.0 - 999.0

Elements Set 1:

| Symbol | C   | H    | N | O | S | F | Na |
|--------|-----|------|---|---|---|---|----|
| Min    | 0   | 0    | 2 | 6 | 2 | 3 | 0  |
| Max    | 400 | 1000 | 2 | 6 | 2 | 3 | 1  |

## Results

| Mass      | Formula                                                                                      | Calculated Mass | Mass Difference [mDa] | Mass Difference [ppm] | DBE  |
|-----------|----------------------------------------------------------------------------------------------|-----------------|-----------------------|-----------------------|------|
| 373.07066 | C <sub>9</sub> H <sub>20</sub> N <sub>2</sub> O <sub>6</sub> F <sub>3</sub> S <sub>2</sub>   | 373.07094       | -0.27                 | -0.74                 | -0.5 |
| 395.05320 | C <sub>9</sub> H <sub>19</sub> N <sub>2</sub> O <sub>6</sub> F <sub>3</sub> NaS <sub>2</sub> | 395.05288       | 0.32                  | 0.81                  | -0.5 |

$^1\text{H}$  NMR spectrum of **ZIL 4b**

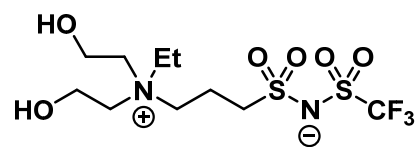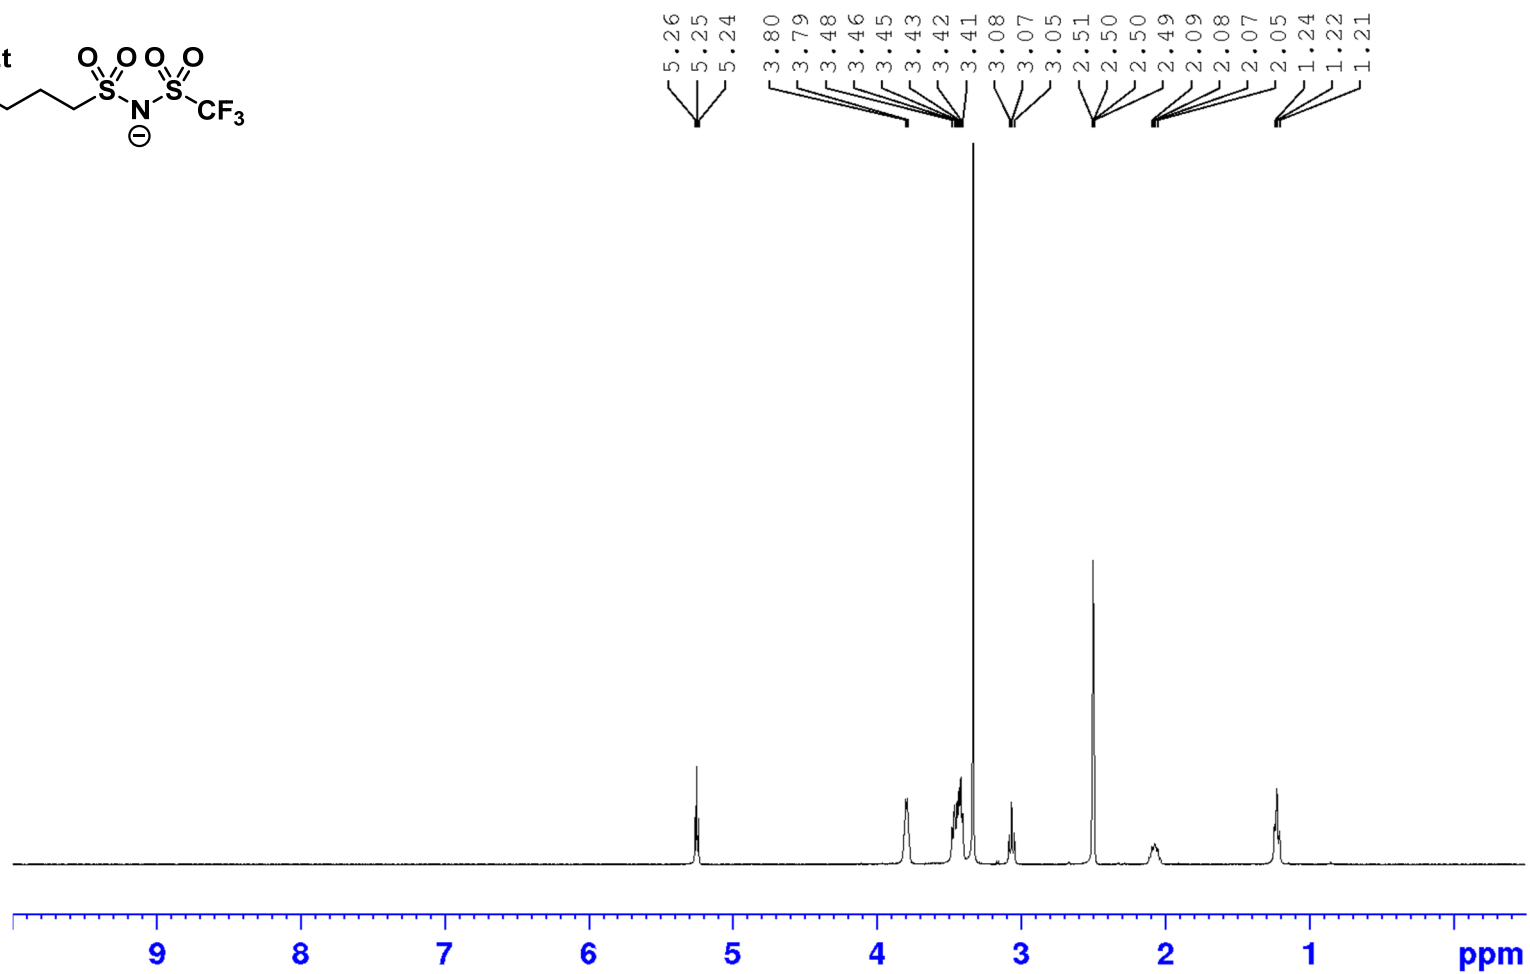

$^{19}\text{F}$  NMR spectrum of **ZIL 4b**

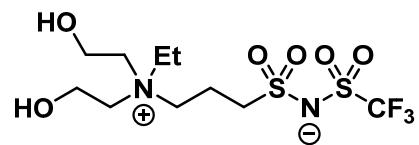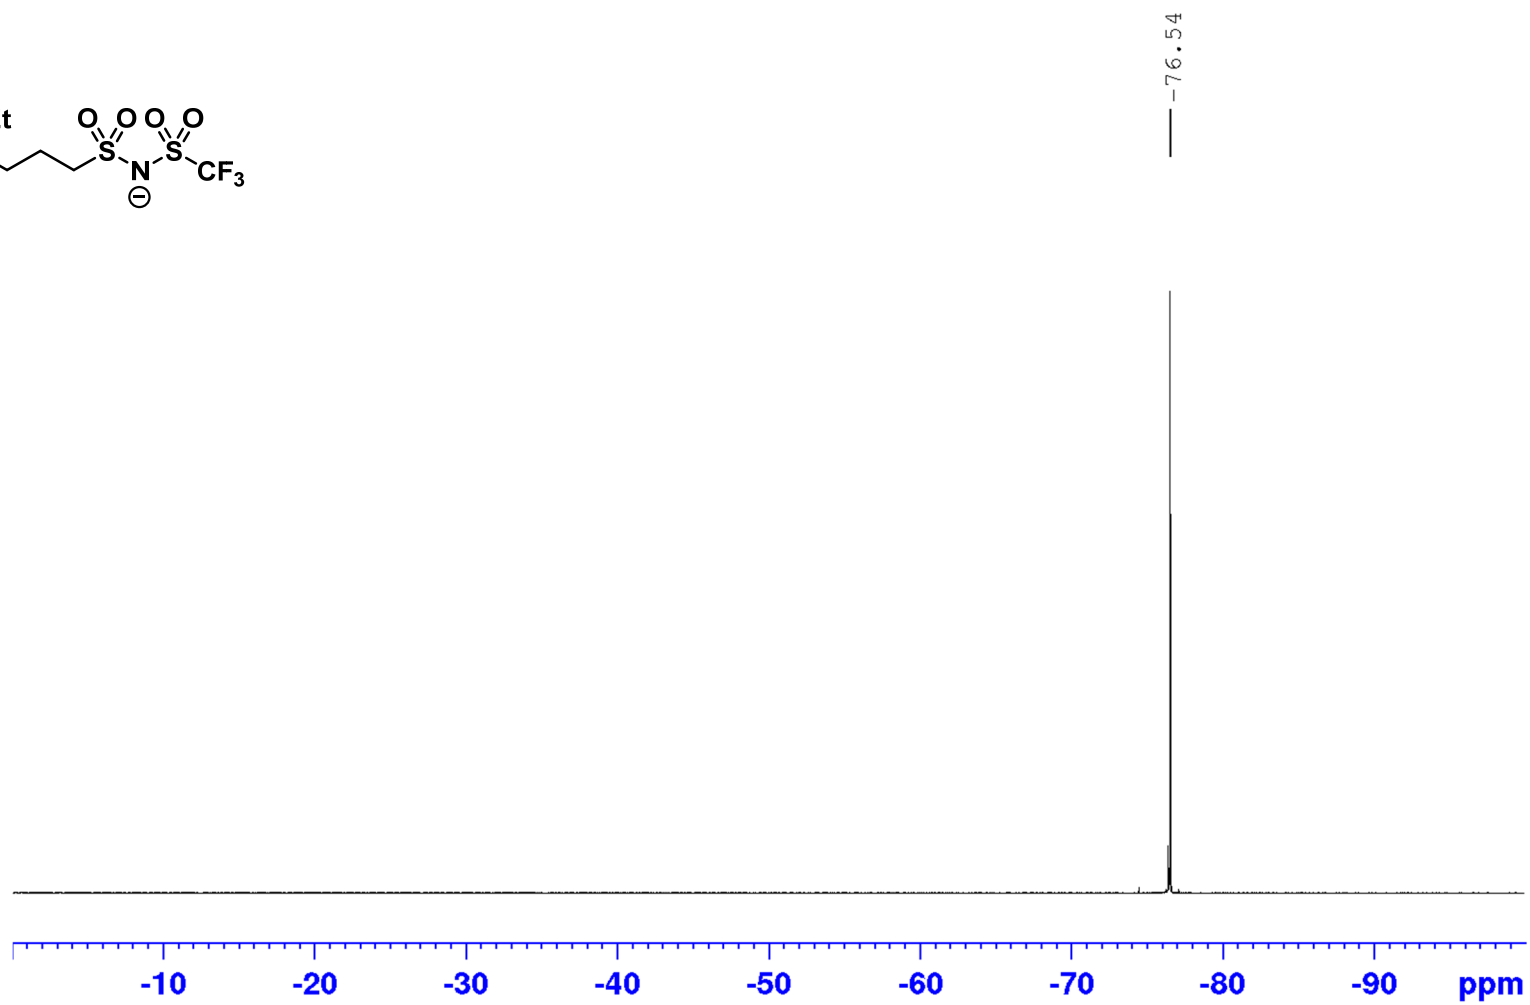

$^{13}\text{C}$  NMR spectrum of **ZIL 4b**

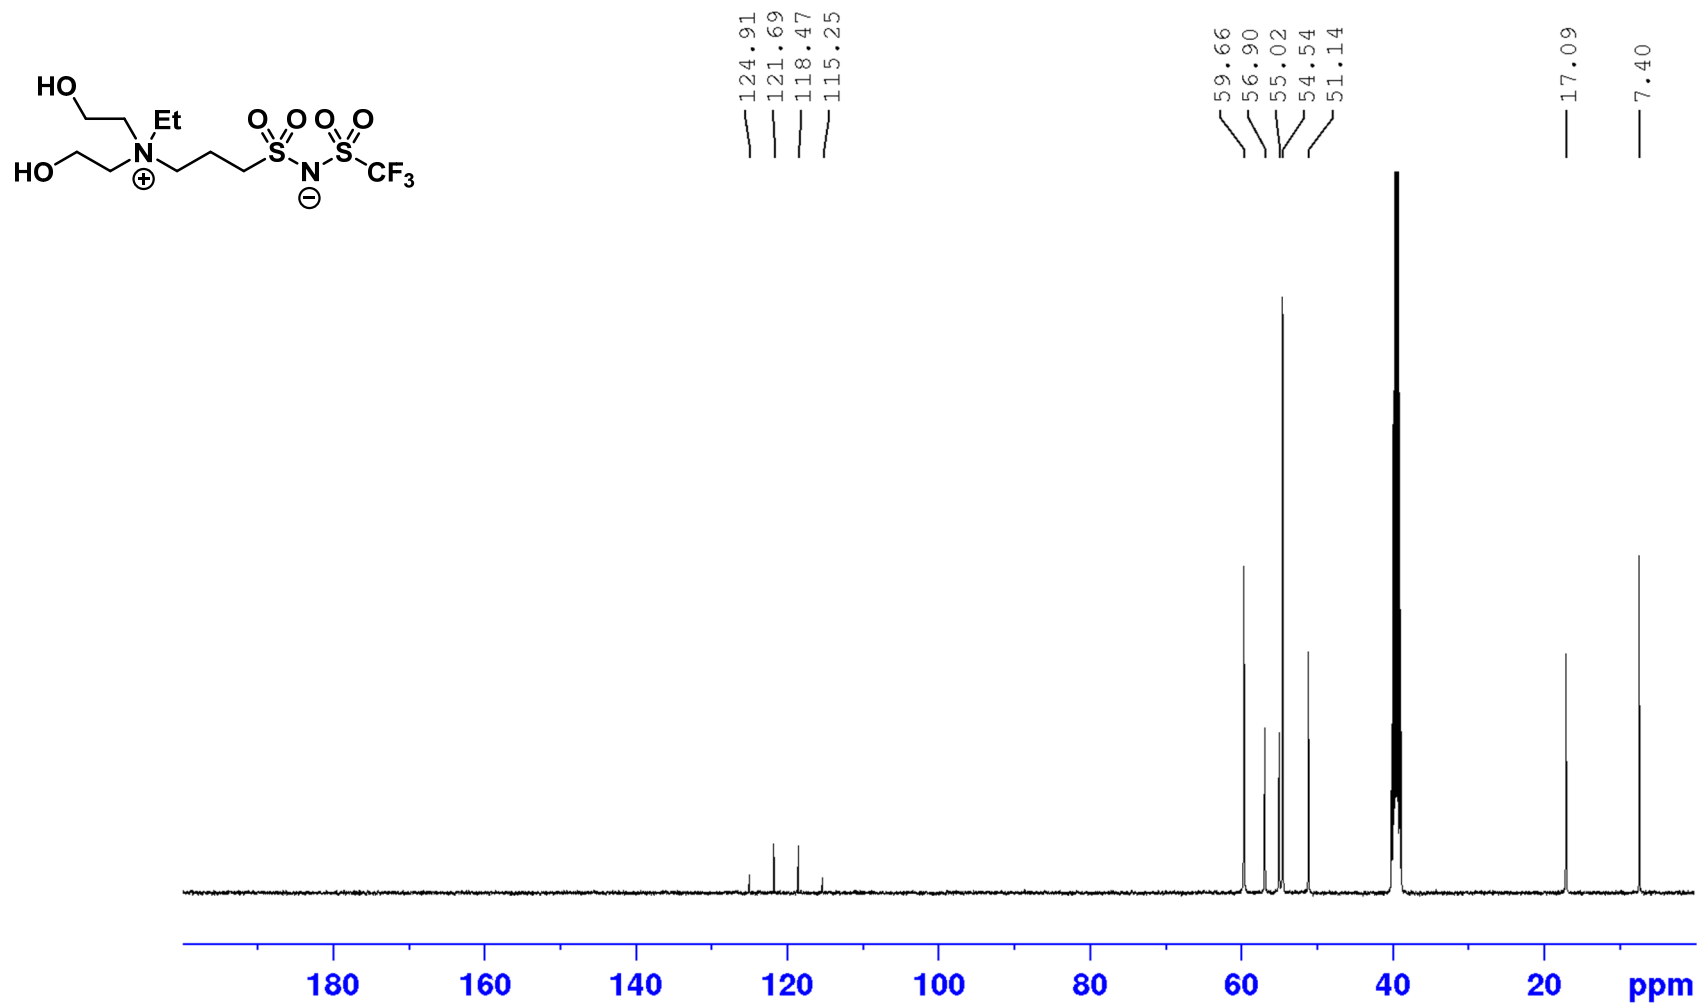

# Mass spectrum of ZIL 4b

Spectrum

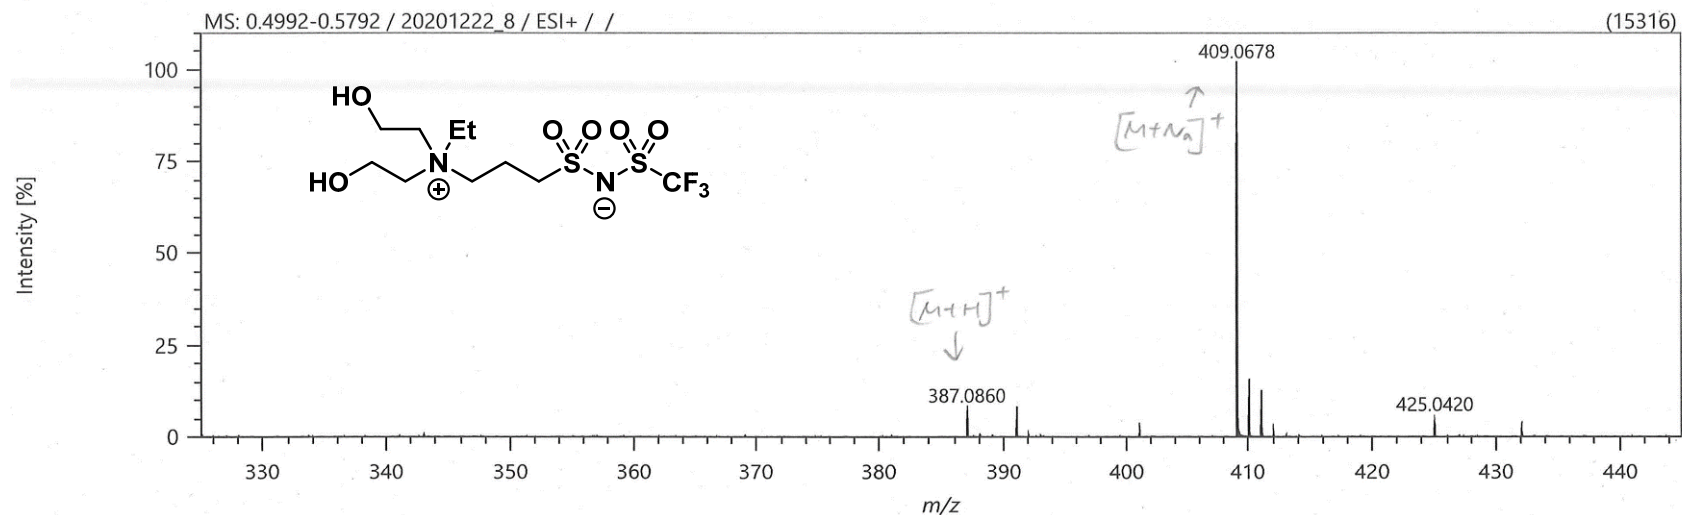

## Elemental Composition

Parameters

Tolerance:  $\pm 2.00$  ppm  
 Electron: Odd/Even  
 Charge: +1  
 DBE: -99.0 - 999.0

Elements Set 1:

| Symbol | C   | H    | F | N | O | S | Na |
|--------|-----|------|---|---|---|---|----|
| Min    | 0   | 0    | 3 | 2 | 6 | 2 | 0  |
| Max    | 400 | 1000 | 3 | 2 | 6 | 2 | 1  |

## Results

| Mass      | Formula                                                                                        | Calculated Mass | Mass Difference [mDa] | Mass Difference [ppm] | DBE  |
|-----------|------------------------------------------------------------------------------------------------|-----------------|-----------------------|-----------------------|------|
| 387.08598 | C <sub>10</sub> H <sub>22</sub> N <sub>2</sub> O <sub>6</sub> F <sub>3</sub> S <sub>2</sub>    | 387.08659       | -0.61                 | -1.57                 | -0.5 |
| 409.06784 | C <sub>10</sub> H <sub>21</sub> N <sub>2</sub> O <sub>6</sub> F <sub>3</sub> Na S <sub>2</sub> | 409.06853       | -0.69                 | -1.69                 | -0.5 |

$^1\text{H}$  NMR spectrum of **ZIL 4c**

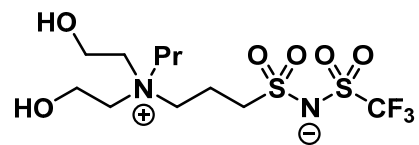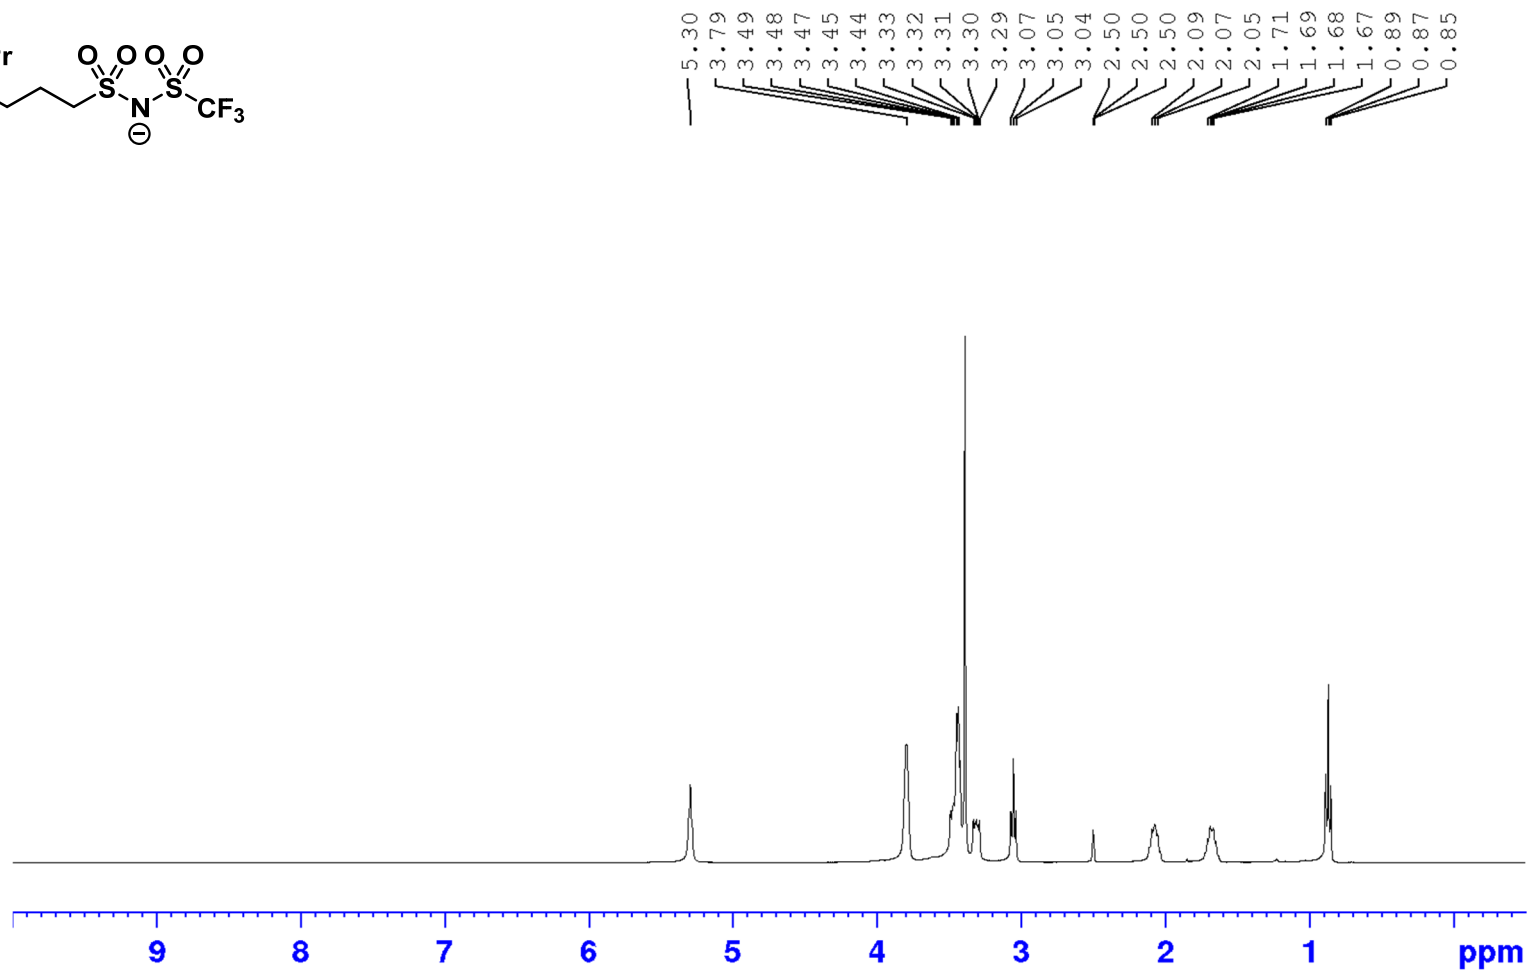

$^{19}\text{F}$  NMR spectrum of **ZIL 4c**

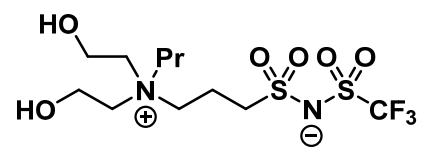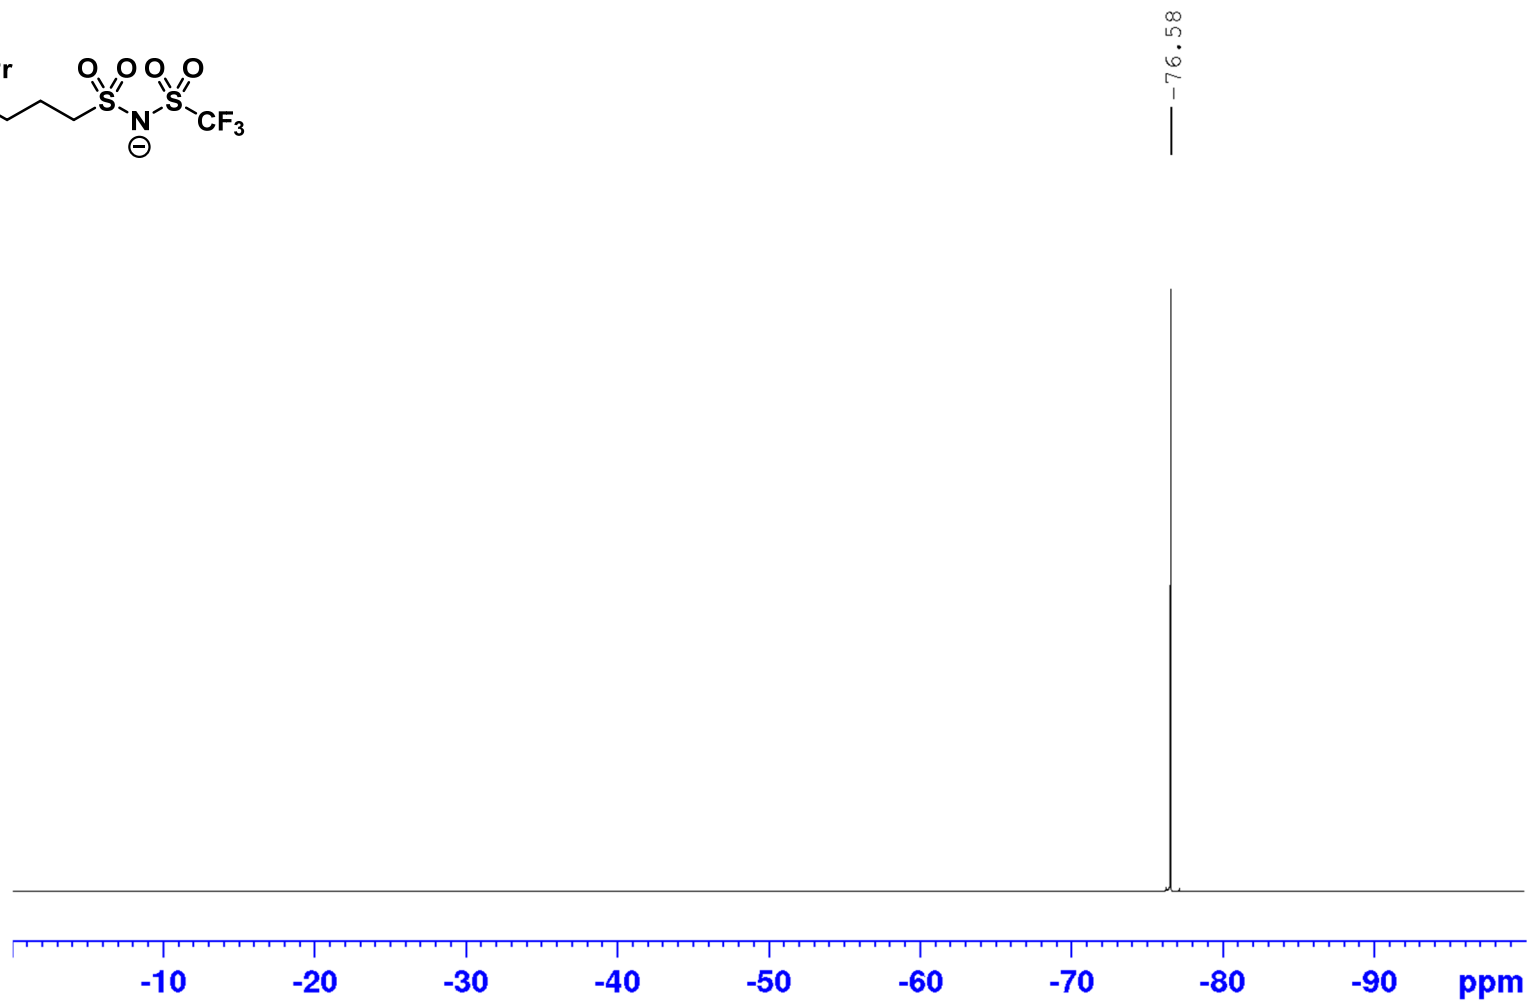

$^{13}\text{C}$  NMR spectrum of **ZIL 4c**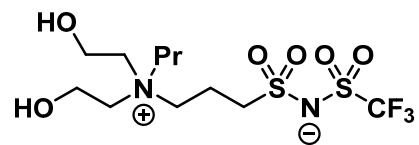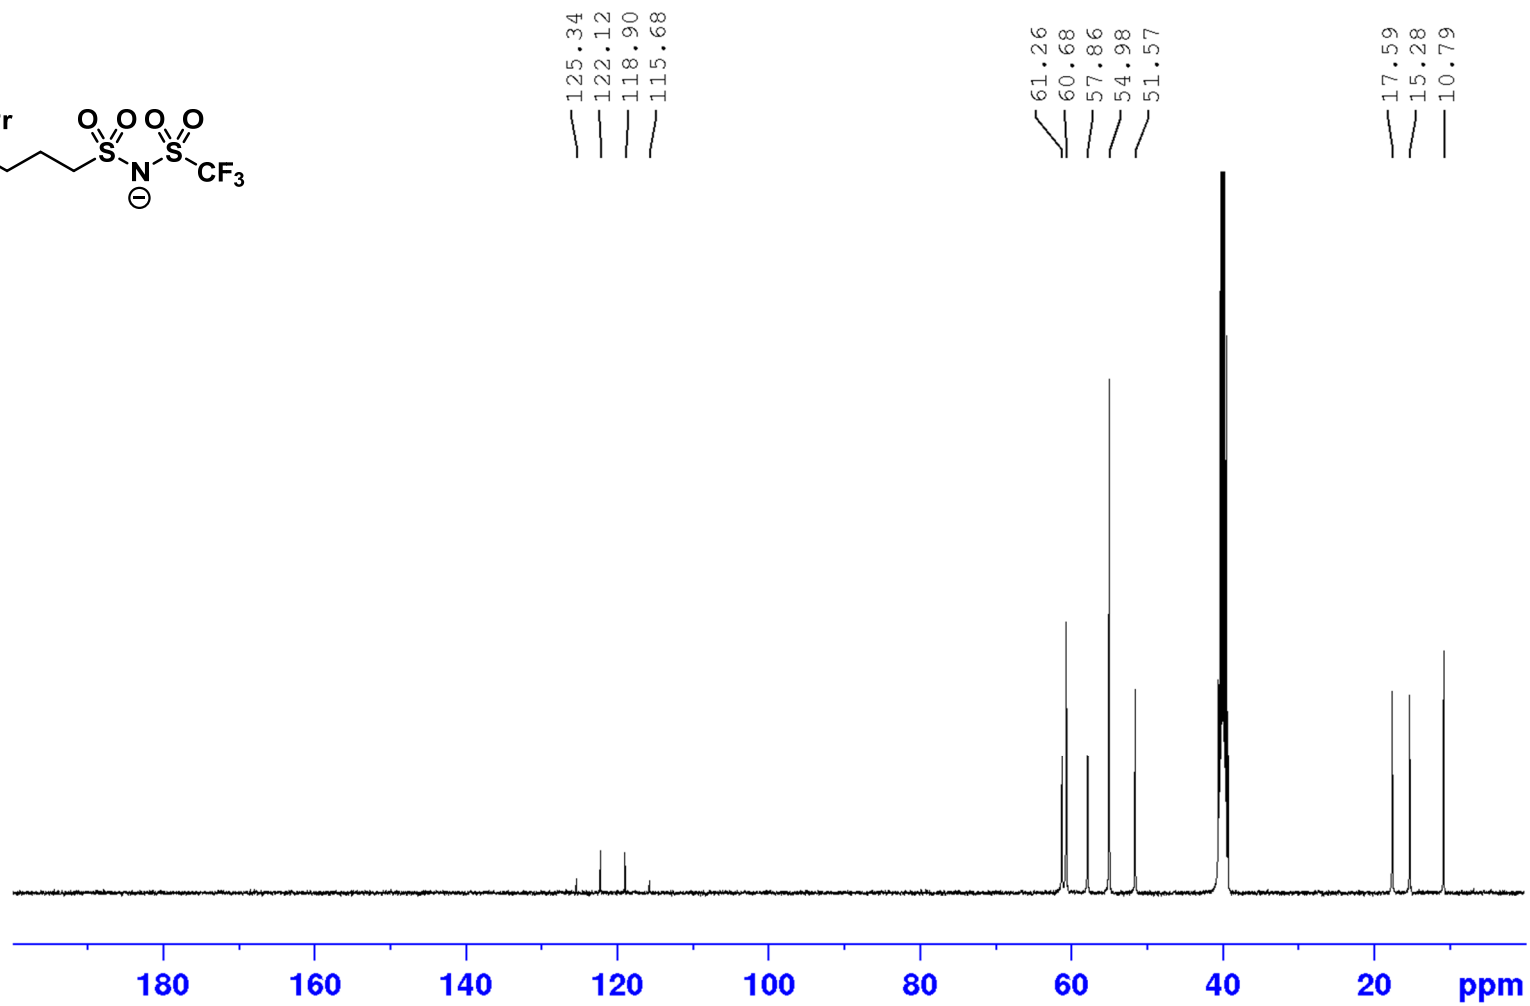

# Mass spectrum of ZIL 4c

Spectrum

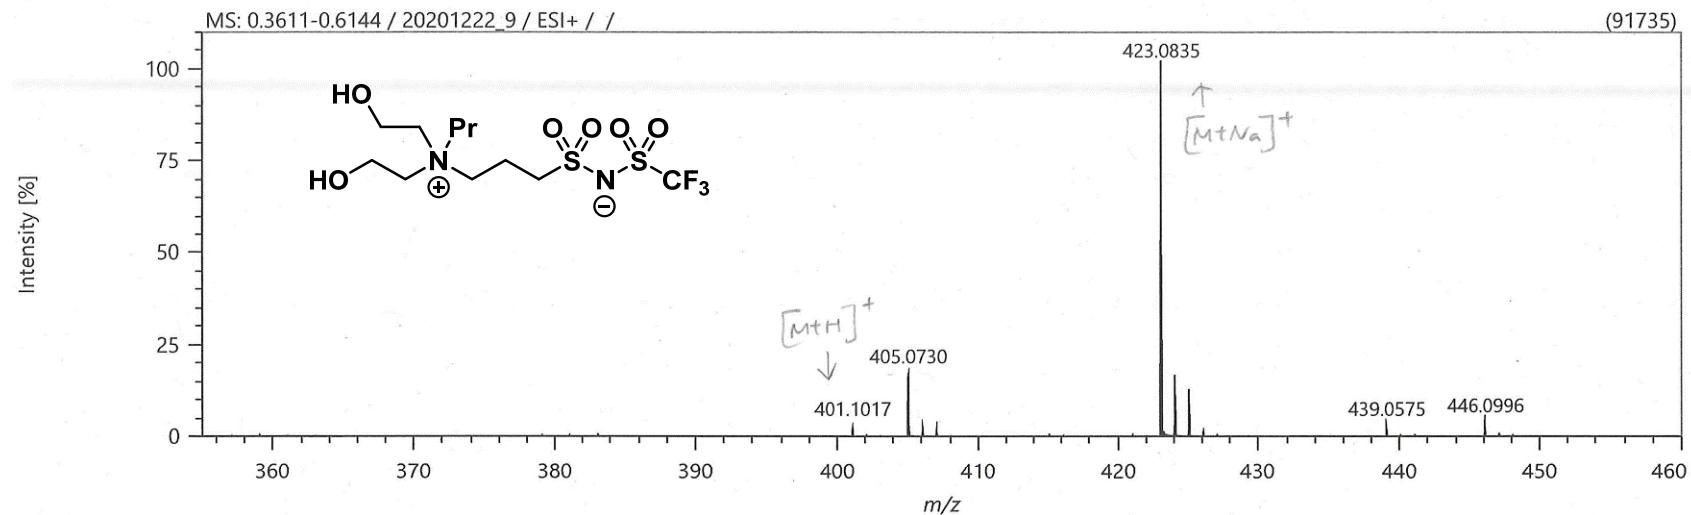

## Elemental Composition

Parameters

Tolerance:  $\pm 2.00$  ppm  
 Electron: Odd/Even  
 Charge: +1  
 DBE: -99.0 - 999.0

Elements Set 1:

| Symbol | C   | H    | F | N | O | S | Na |
|--------|-----|------|---|---|---|---|----|
| Min    | 0   | 0    | 3 | 2 | 6 | 2 | 0  |
| Max    | 400 | 1000 | 3 | 2 | 6 | 2 | 1  |

## Results

| Mass      | Formula                                                                                        | Calculated Mass | Mass Difference [mDa] | Mass Difference [ppm] | DBE  |
|-----------|------------------------------------------------------------------------------------------------|-----------------|-----------------------|-----------------------|------|
| 401.10167 | C <sub>11</sub> H <sub>24</sub> N <sub>2</sub> O <sub>6</sub> F <sub>3</sub> S <sub>2</sub>    | 401.10224       | -0.57                 | -1.43                 | -0.5 |
| 423.08348 | C <sub>11</sub> H <sub>23</sub> N <sub>2</sub> O <sub>6</sub> F <sub>3</sub> Na S <sub>2</sub> | 423.08418       | -0.70                 | -1.66                 | -0.5 |

$^1\text{H}$  NMR spectrum of **ZIL 4d**

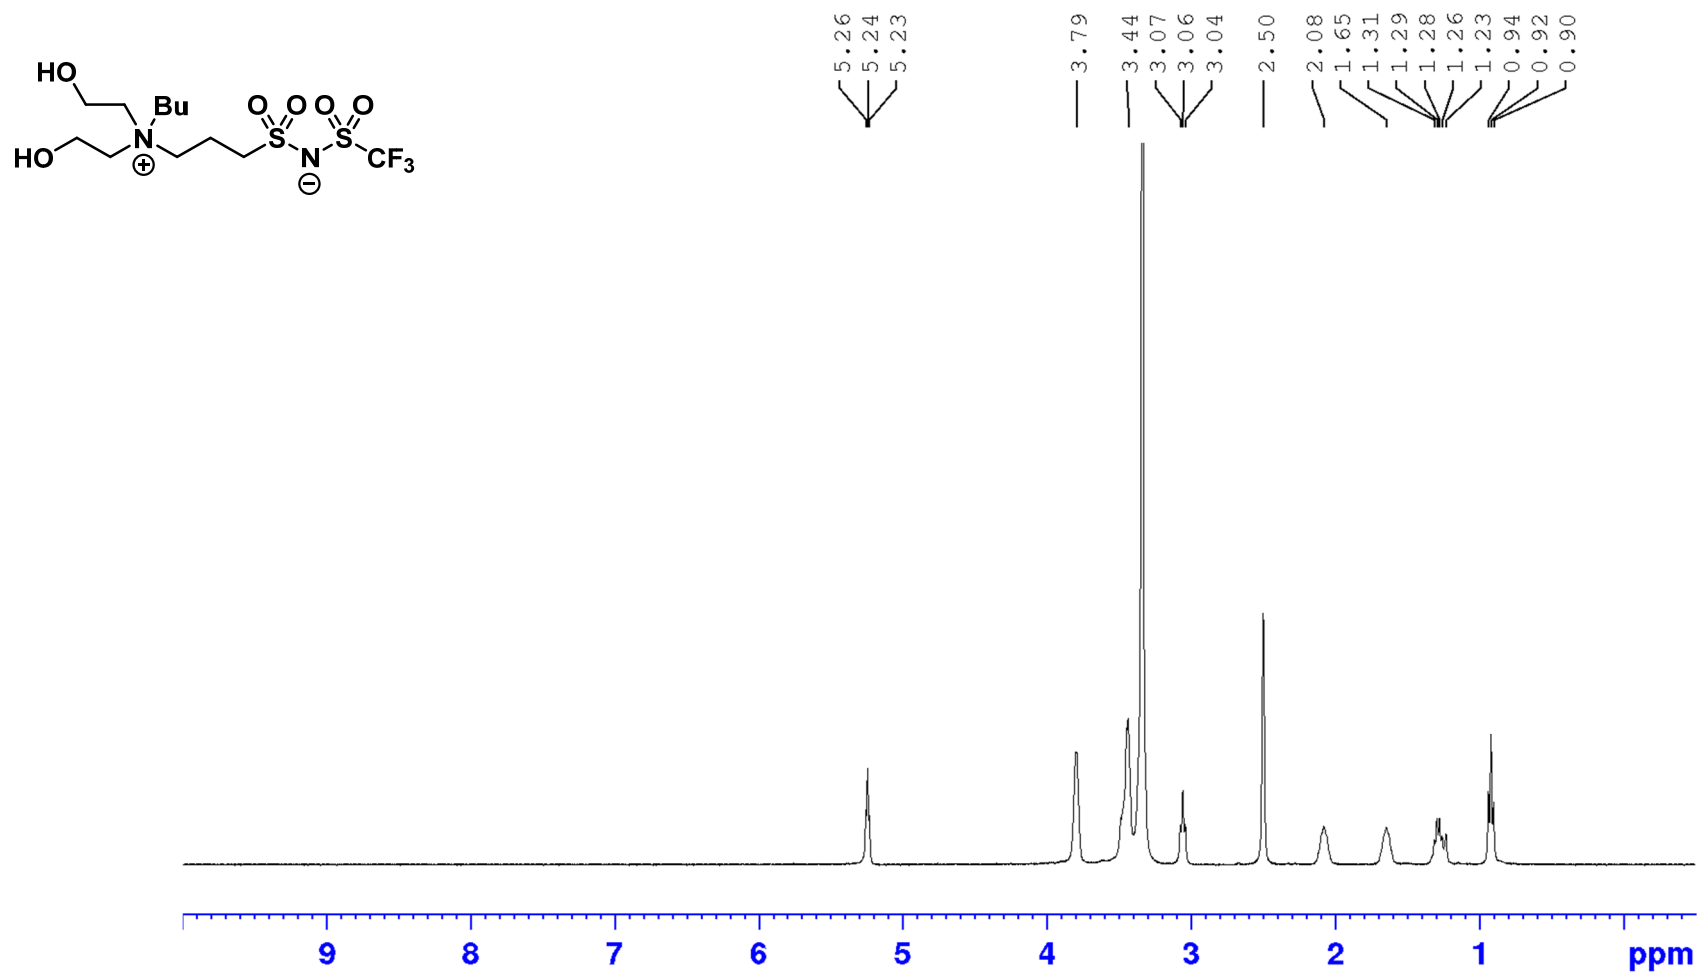

$^{19}\text{F}$  NMR spectrum of **ZIL 4d**

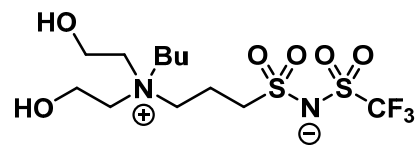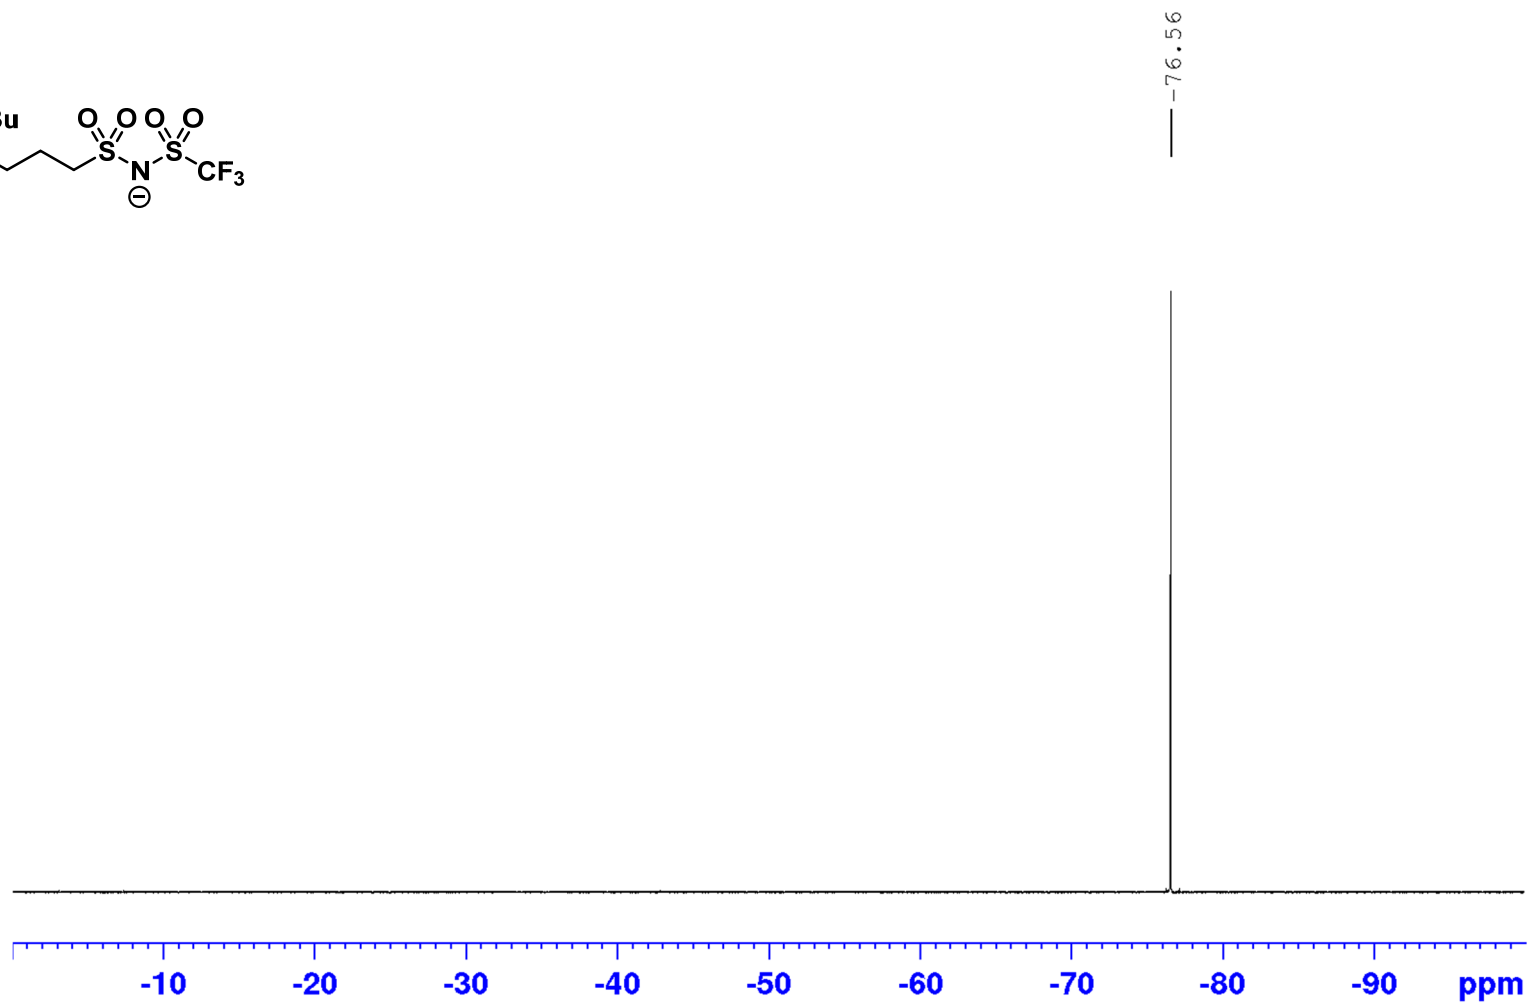

$^{13}\text{C}$  NMR spectrum of **ZIL 4d**

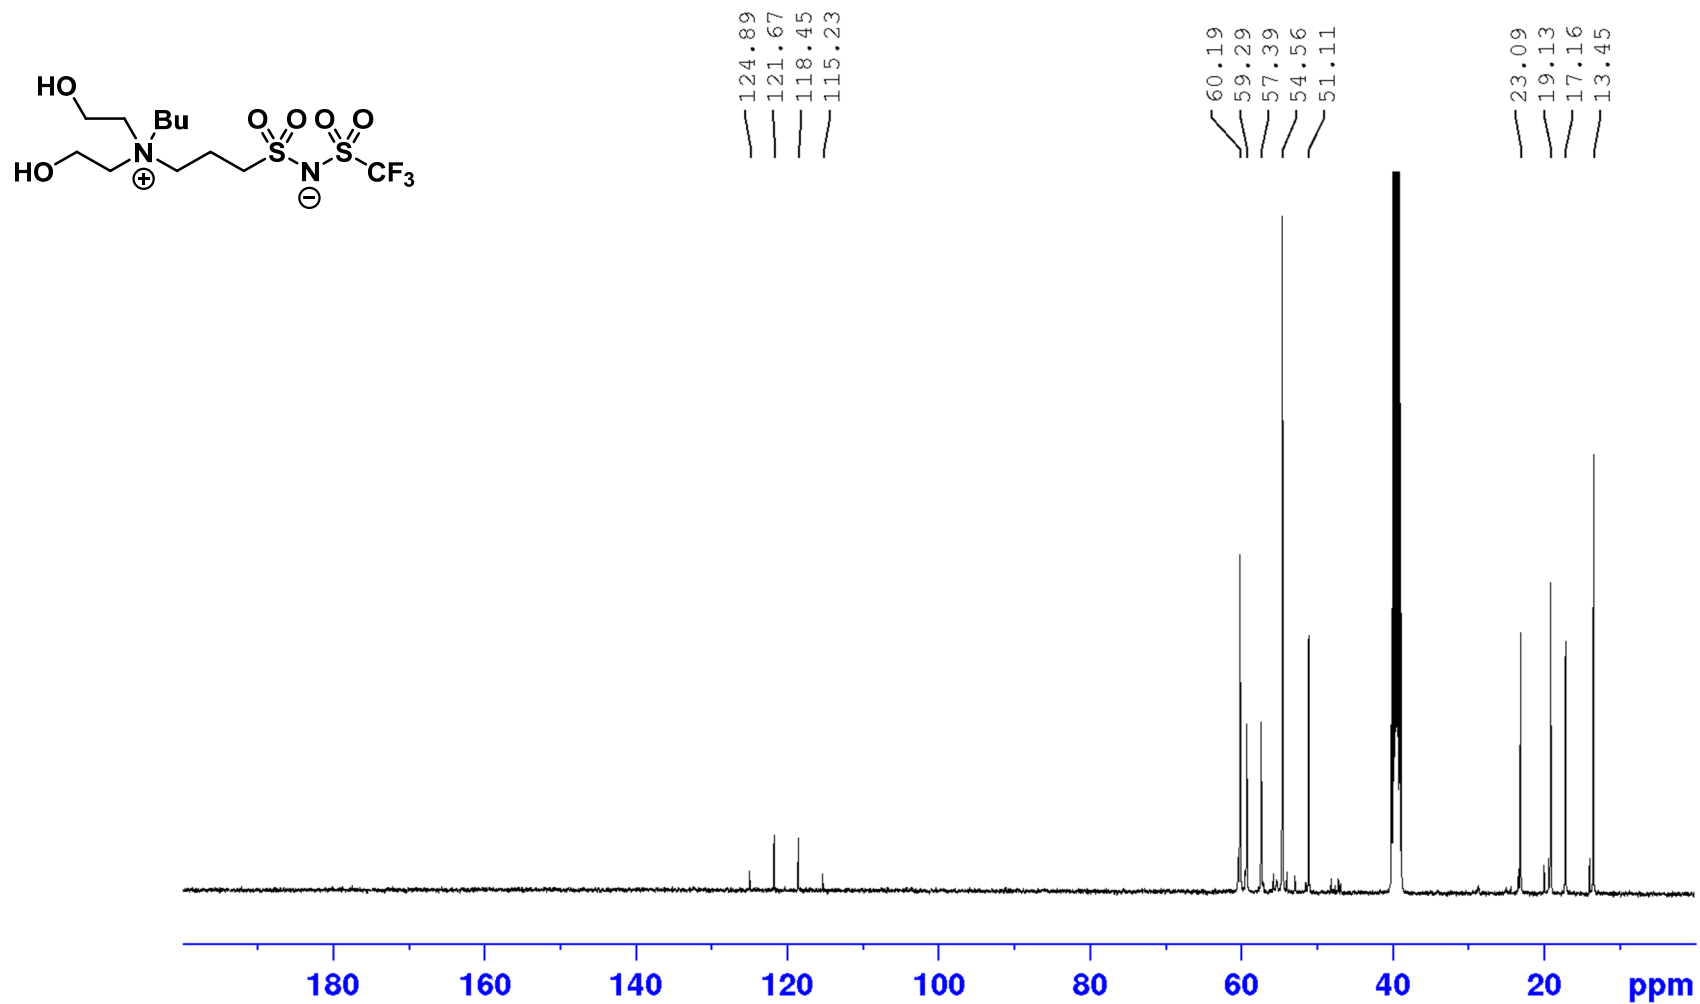

# Mass spectrum of ZIL 4d

Spectrum

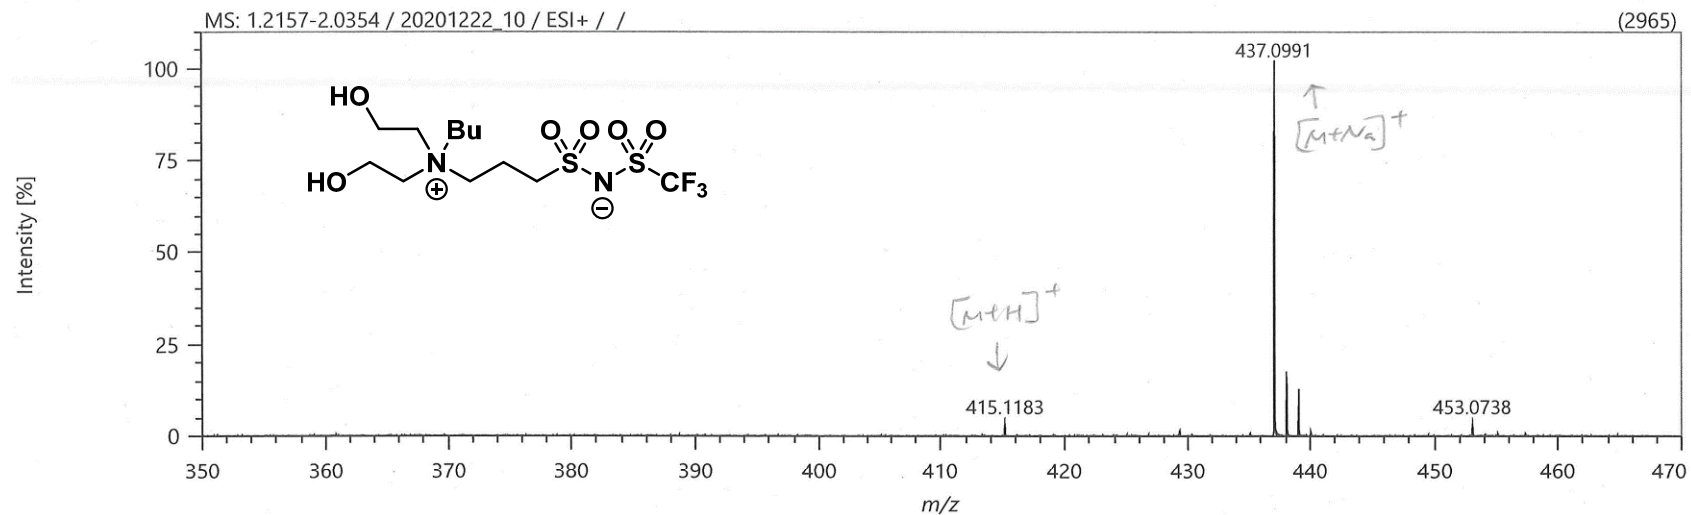

## Elemental Composition

Parameters

Tolerance:  $\pm 2.00$  ppm  
 Electron: Odd/Even  
 Charge: +1  
 DBE: -99.0 - 999.0

Elements Set 1:

| Symbol | C   | H    | F | N | O | S | Na |
|--------|-----|------|---|---|---|---|----|
| Min    | 0   | 0    | 3 | 2 | 6 | 2 | 0  |
| Max    | 400 | 1000 | 3 | 2 | 6 | 2 | 1  |

## Results

| Mass      | Formula                                                                                        | Calculated Mass | Mass Difference [mDa] | Mass Difference [ppm] | DBE  |
|-----------|------------------------------------------------------------------------------------------------|-----------------|-----------------------|-----------------------|------|
| 415.11831 | C <sub>12</sub> H <sub>26</sub> N <sub>2</sub> O <sub>6</sub> F <sub>3</sub> S <sub>2</sub>    | 415.11789       | 0.42                  | 1.02                  | -0.5 |
| 437.09914 | C <sub>12</sub> H <sub>25</sub> N <sub>2</sub> O <sub>6</sub> F <sub>3</sub> Na S <sub>2</sub> | 437.09983       | -0.70                 | -1.59                 | -0.5 |

$^1\text{H}$  NMR spectrum of **ZIL 4d-ene**

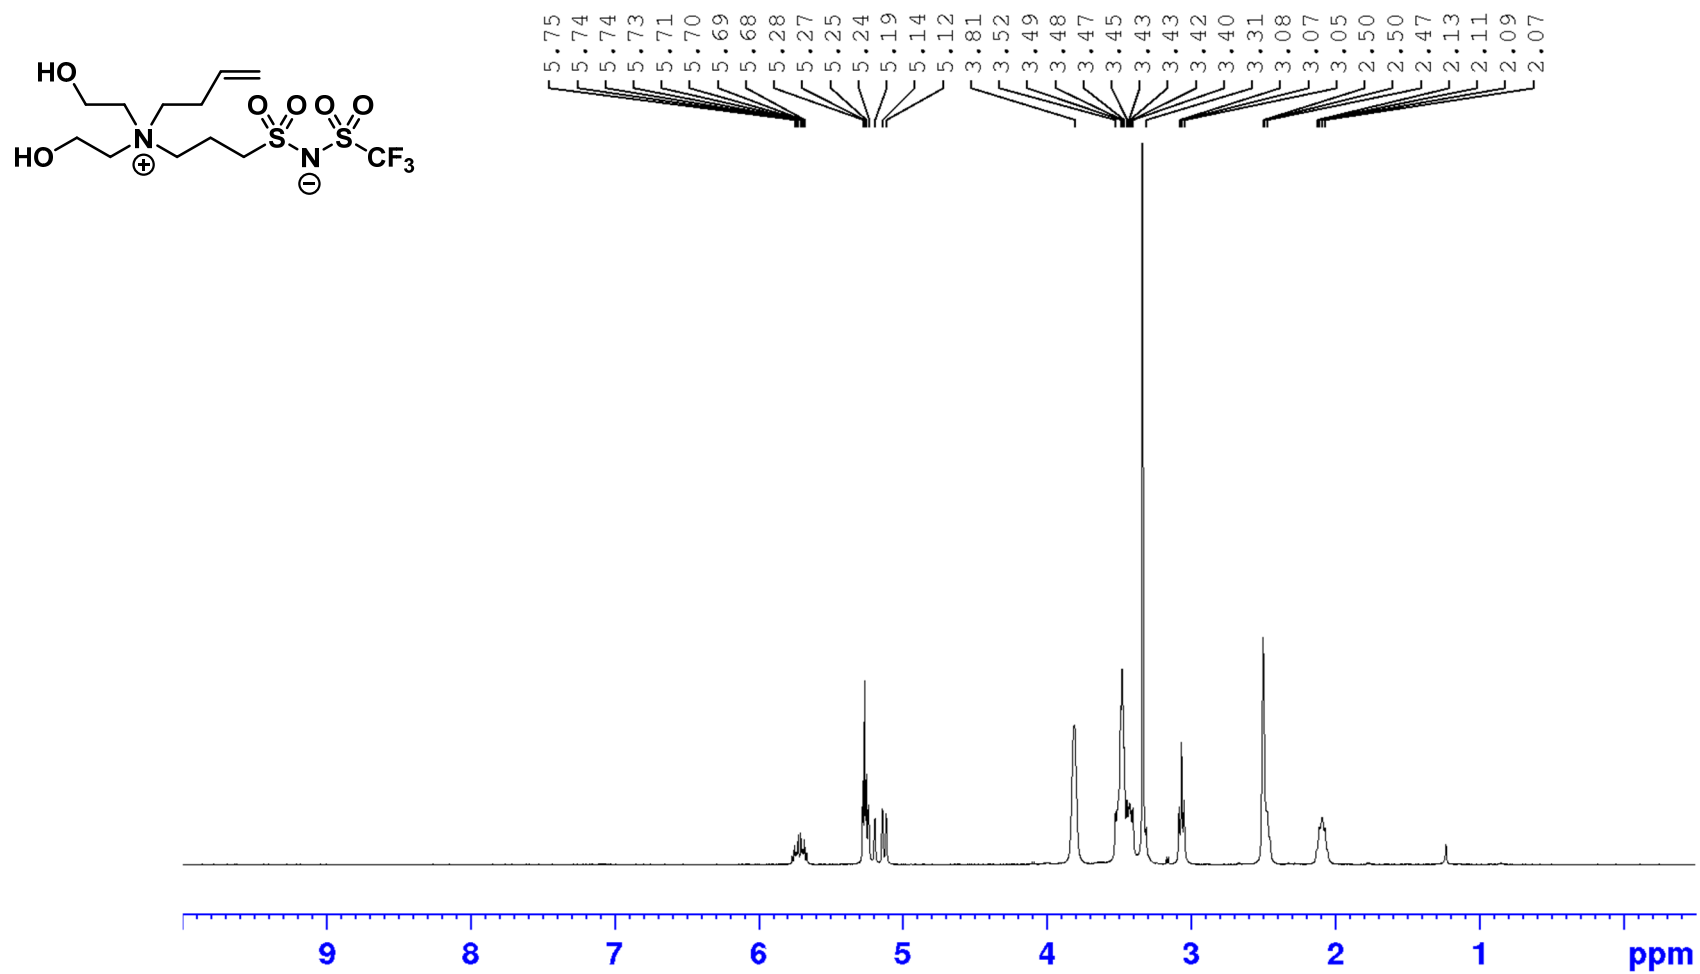

$^{19}\text{F}$  NMR spectrum of **ZIL 4d-ene**

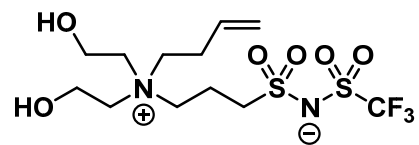

— -76.54

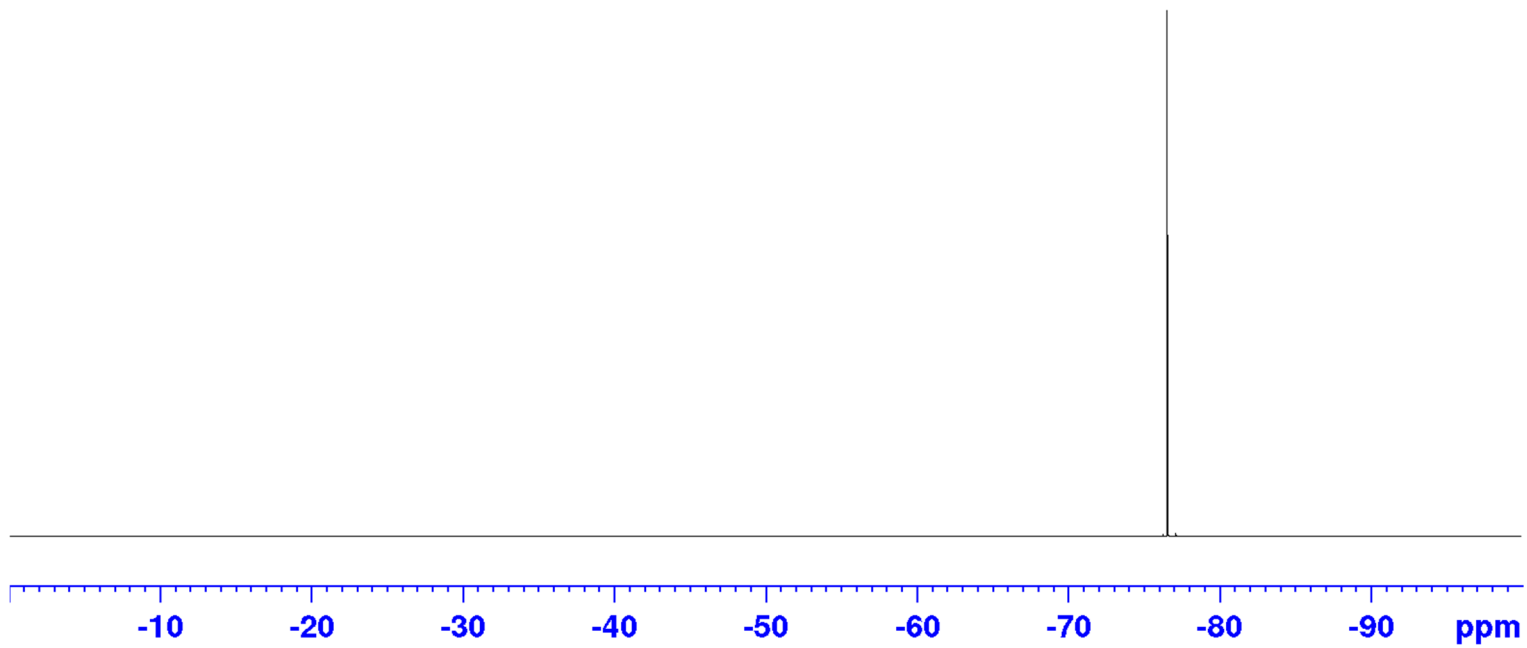

$^{13}\text{C}$  NMR spectrum of **ZIL 4d-ene**

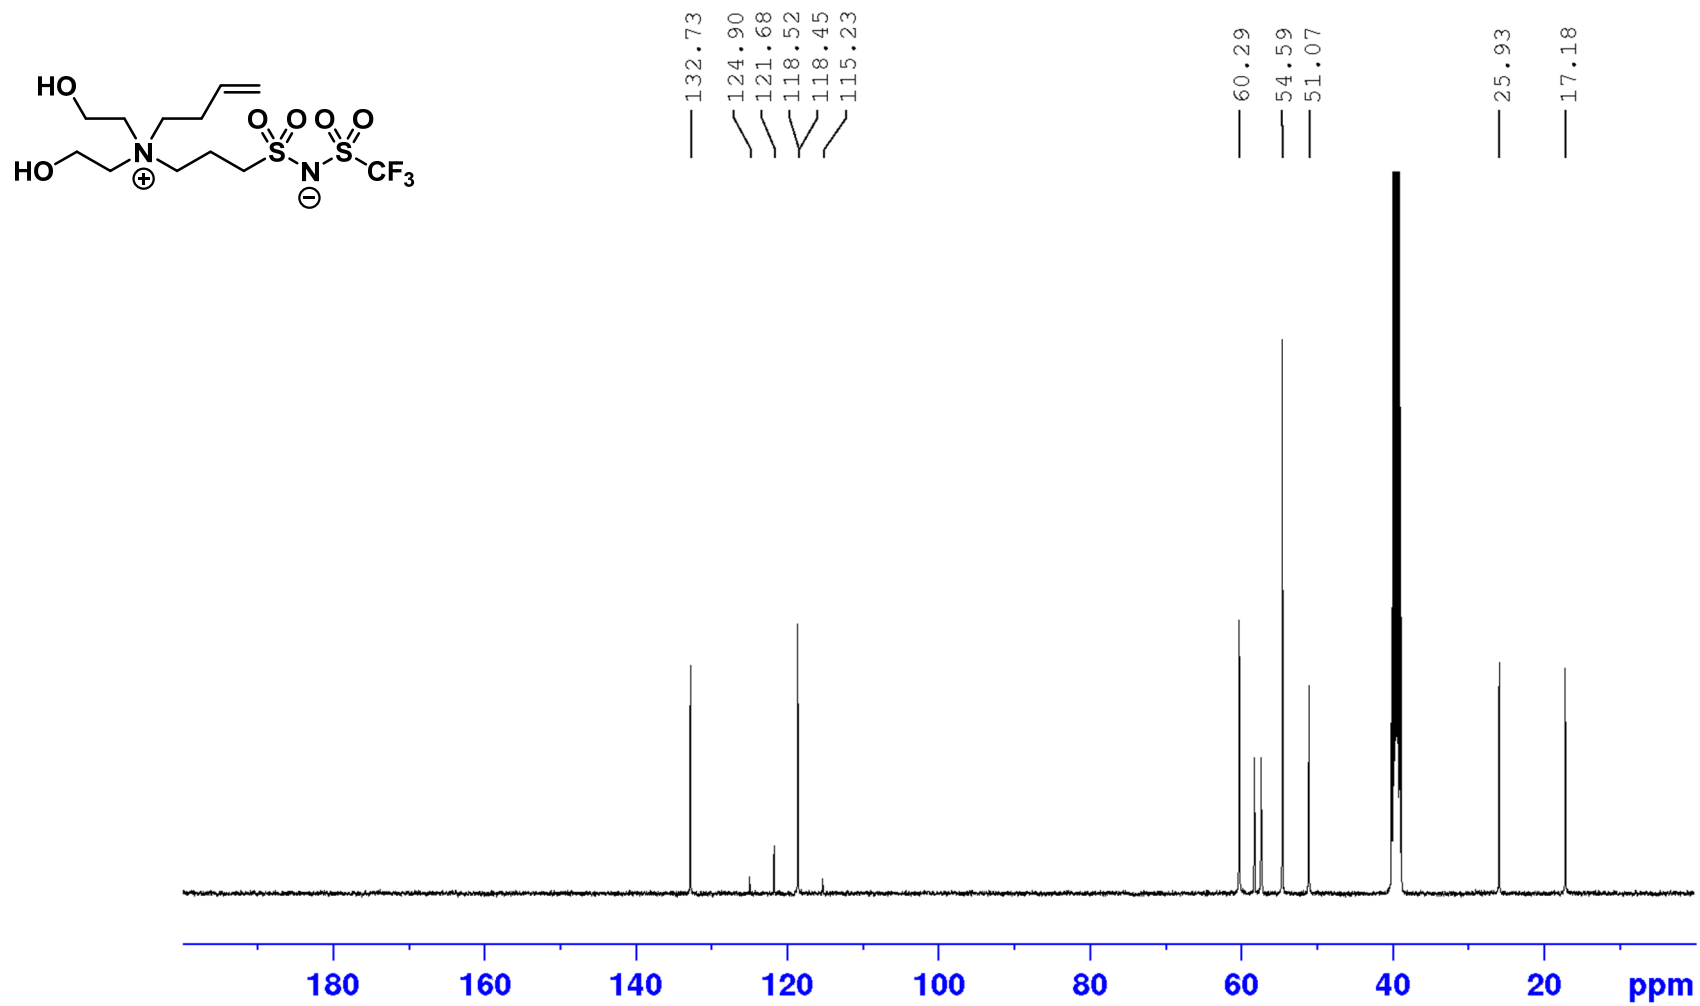

# Mass spectrum of ZIL 4d-ene

Spectrum

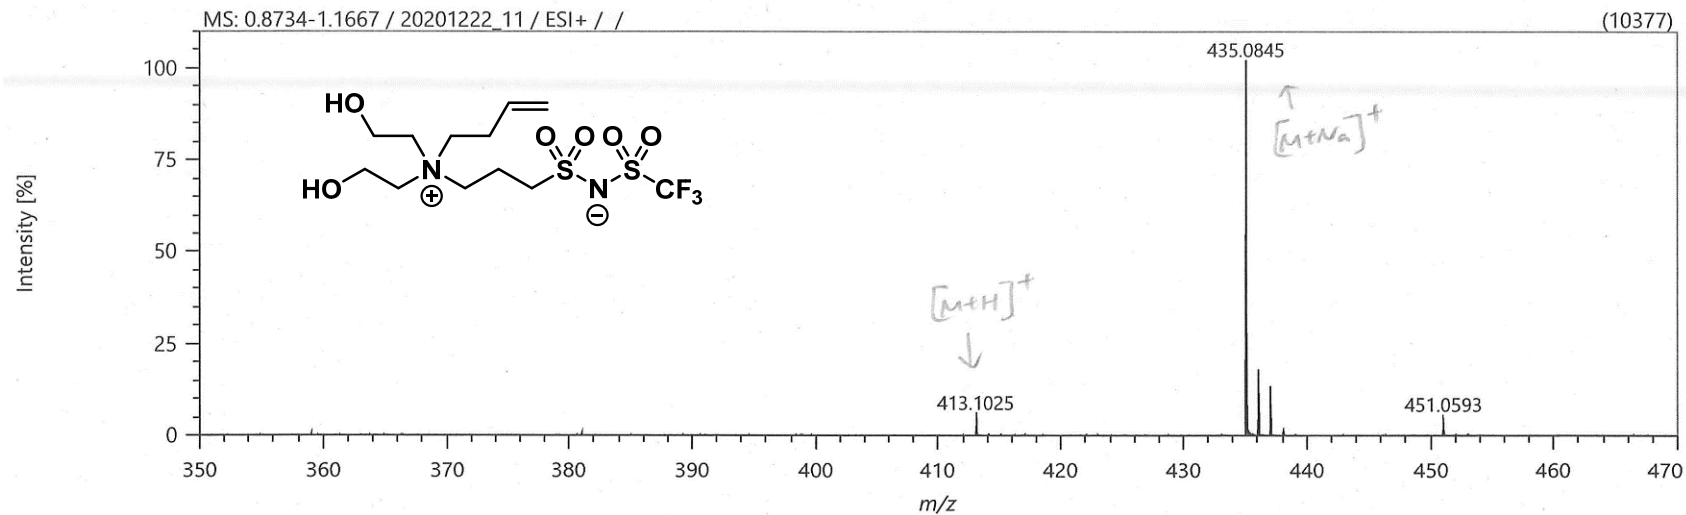

## Elemental Composition

Parameters

Tolerance: ±2.00 ppm  
 Electron: Odd/Even  
 Charge: +1  
 DBE: -99.0 - 999.0

Elements Set 1:

| Symbol | C   | H    | F | N | O | S | Na |
|--------|-----|------|---|---|---|---|----|
| Min    | 0   | 0    | 3 | 2 | 6 | 2 | 0  |
| Max    | 400 | 1000 | 3 | 2 | 6 | 2 | 1  |

## Results

| Mass      | Formula                                                                                        | Calculated Mass | Mass Difference [mDa] | Mass Difference [ppm] | DBE |
|-----------|------------------------------------------------------------------------------------------------|-----------------|-----------------------|-----------------------|-----|
| 413.10250 | C <sub>12</sub> H <sub>24</sub> N <sub>2</sub> O <sub>6</sub> F <sub>3</sub> S <sub>2</sub>    | 413.10224       | 0.26                  | 0.62                  | 0.5 |
| 435.08454 | C <sub>12</sub> H <sub>23</sub> N <sub>2</sub> O <sub>6</sub> F <sub>3</sub> Na S <sub>2</sub> | 435.08418       | 0.35                  | 0.81                  | 0.5 |

$^1\text{H}$  NMR spectrum of **ZIL 4d-yne**

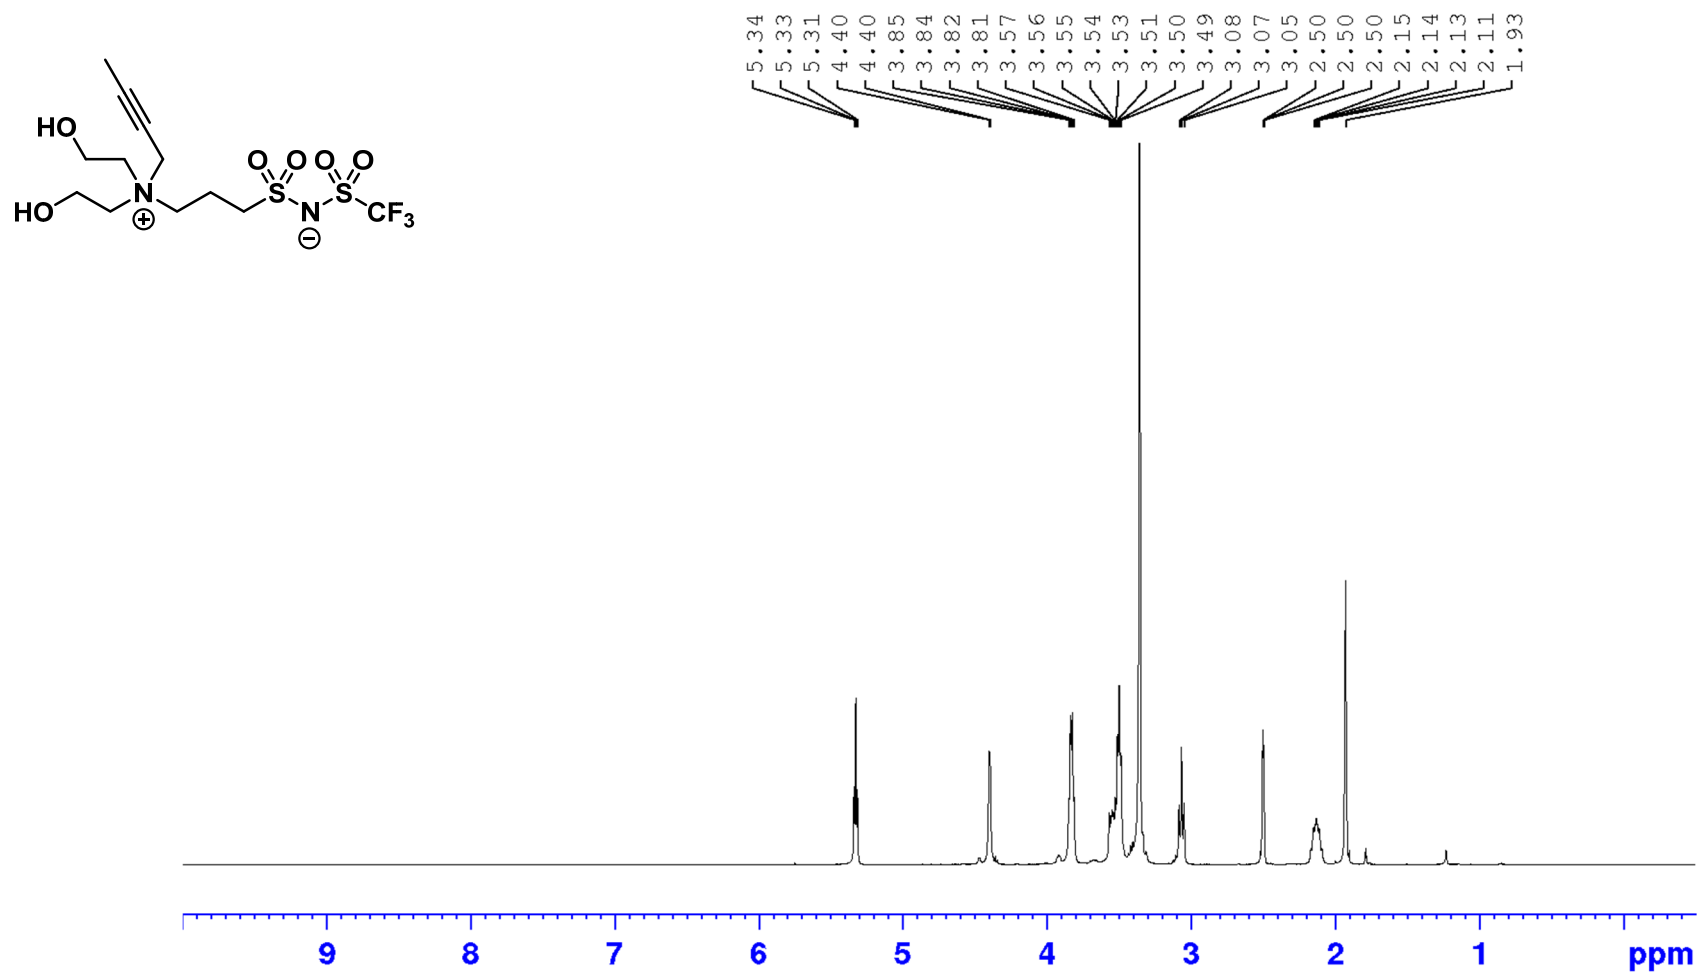

$^{19}\text{F}$  NMR spectrum of **ZIL 4d-yne**

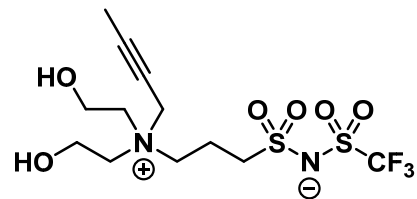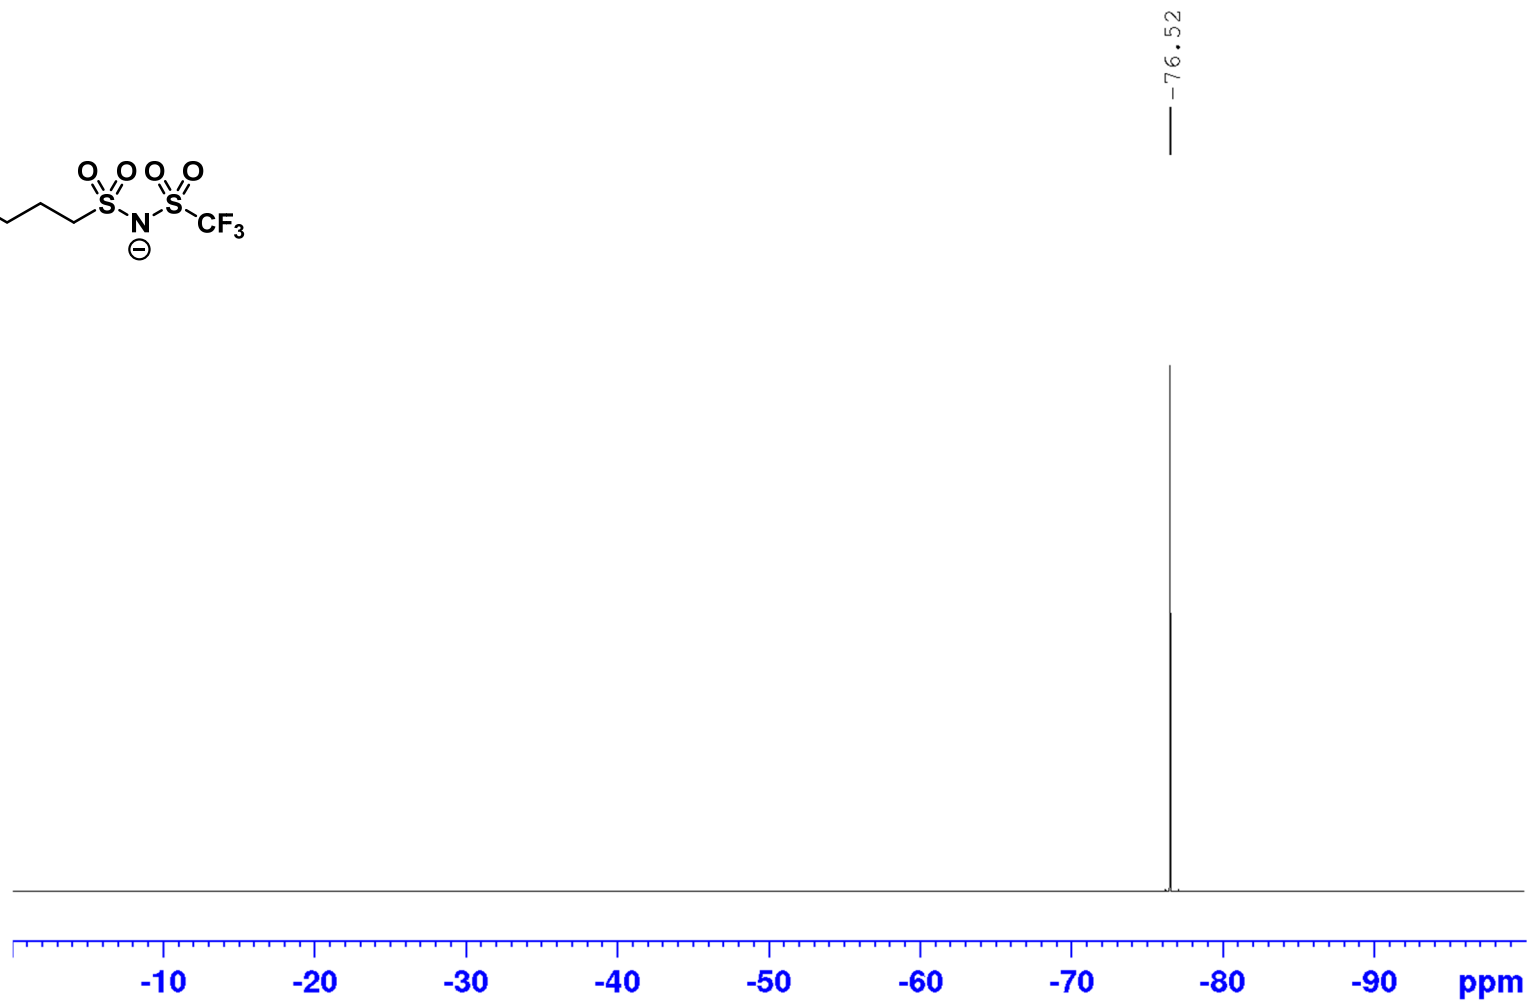

$^{13}\text{C}$  NMR spectrum of **ZIL 4d-yne**

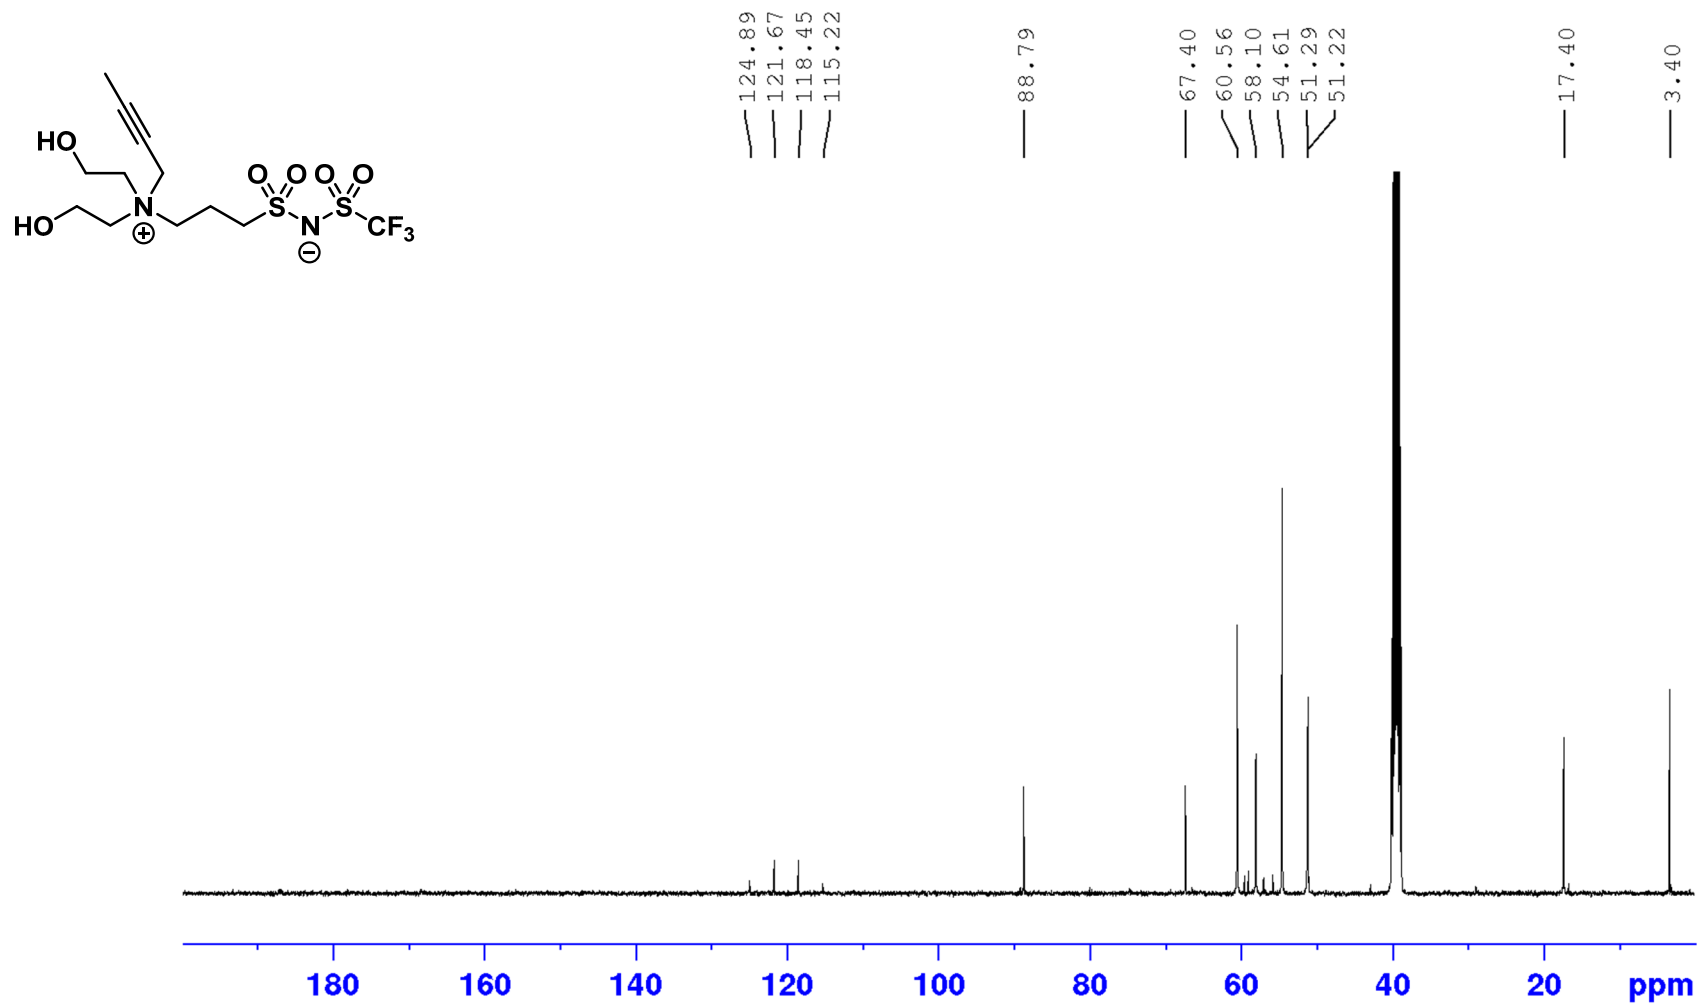

# Mass spectrum of ZIL 4d-yne

Spectrum

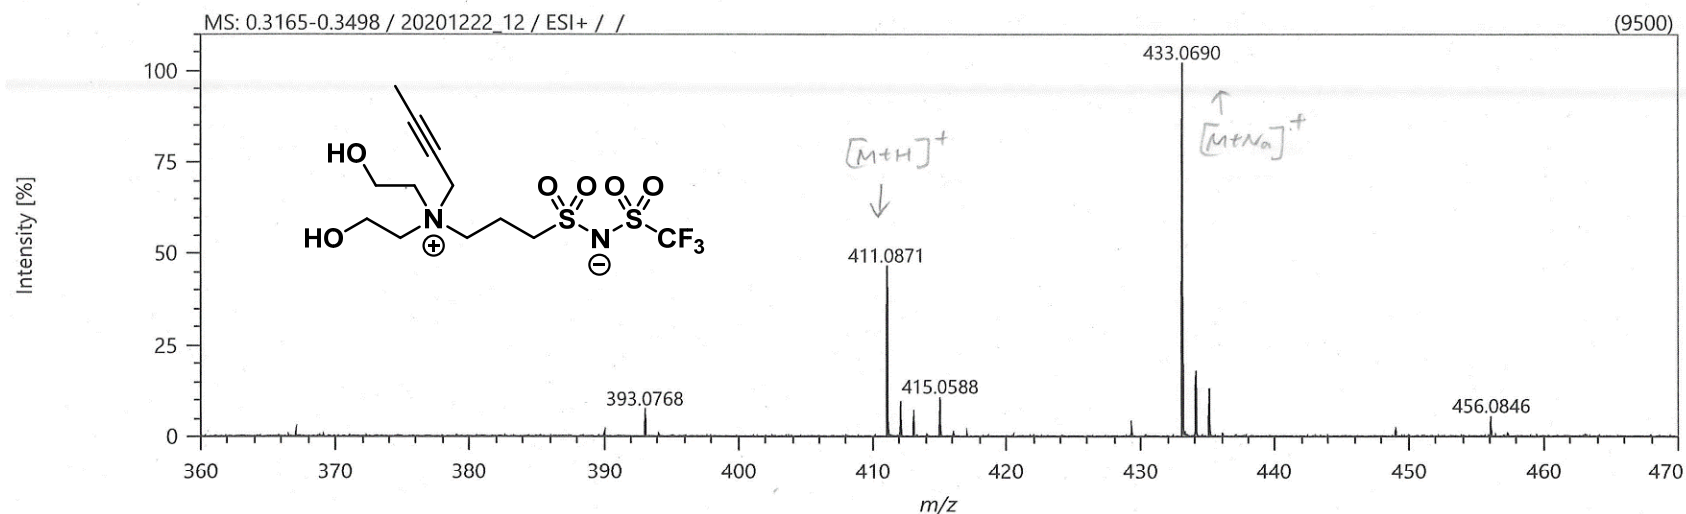

## Elemental Composition

Parameters

Tolerance:  $\pm 2.00$  ppm  
 Electron: Odd/Even  
 Charge: +1  
 DBE: -99.0 - 999.0

Elements Set 1:

| Symbol | C   | H    | F | N | O | S | Na |
|--------|-----|------|---|---|---|---|----|
| Min    | 0   | 0    | 3 | 2 | 6 | 2 | 0  |
| Max    | 400 | 1000 | 3 | 2 | 6 | 2 | 1  |

## Results

| Mass      | Formula                                                                                        | Calculated Mass | Mass Difference [mDa] | Mass Difference [ppm] | DBE |
|-----------|------------------------------------------------------------------------------------------------|-----------------|-----------------------|-----------------------|-----|
| 411.08708 | C <sub>12</sub> H <sub>22</sub> N <sub>2</sub> O <sub>6</sub> F <sub>3</sub> S <sub>2</sub>    | 411.08659       | 0.49                  | 1.19                  | 1.5 |
| 433.06901 | C <sub>12</sub> H <sub>21</sub> N <sub>2</sub> O <sub>6</sub> F <sub>3</sub> Na S <sub>2</sub> | 433.06853       | 0.48                  | 1.11                  | 1.5 |

$^1\text{H}$  NMR spectrum of **ZIL 4e**

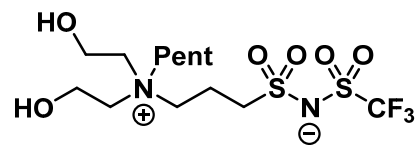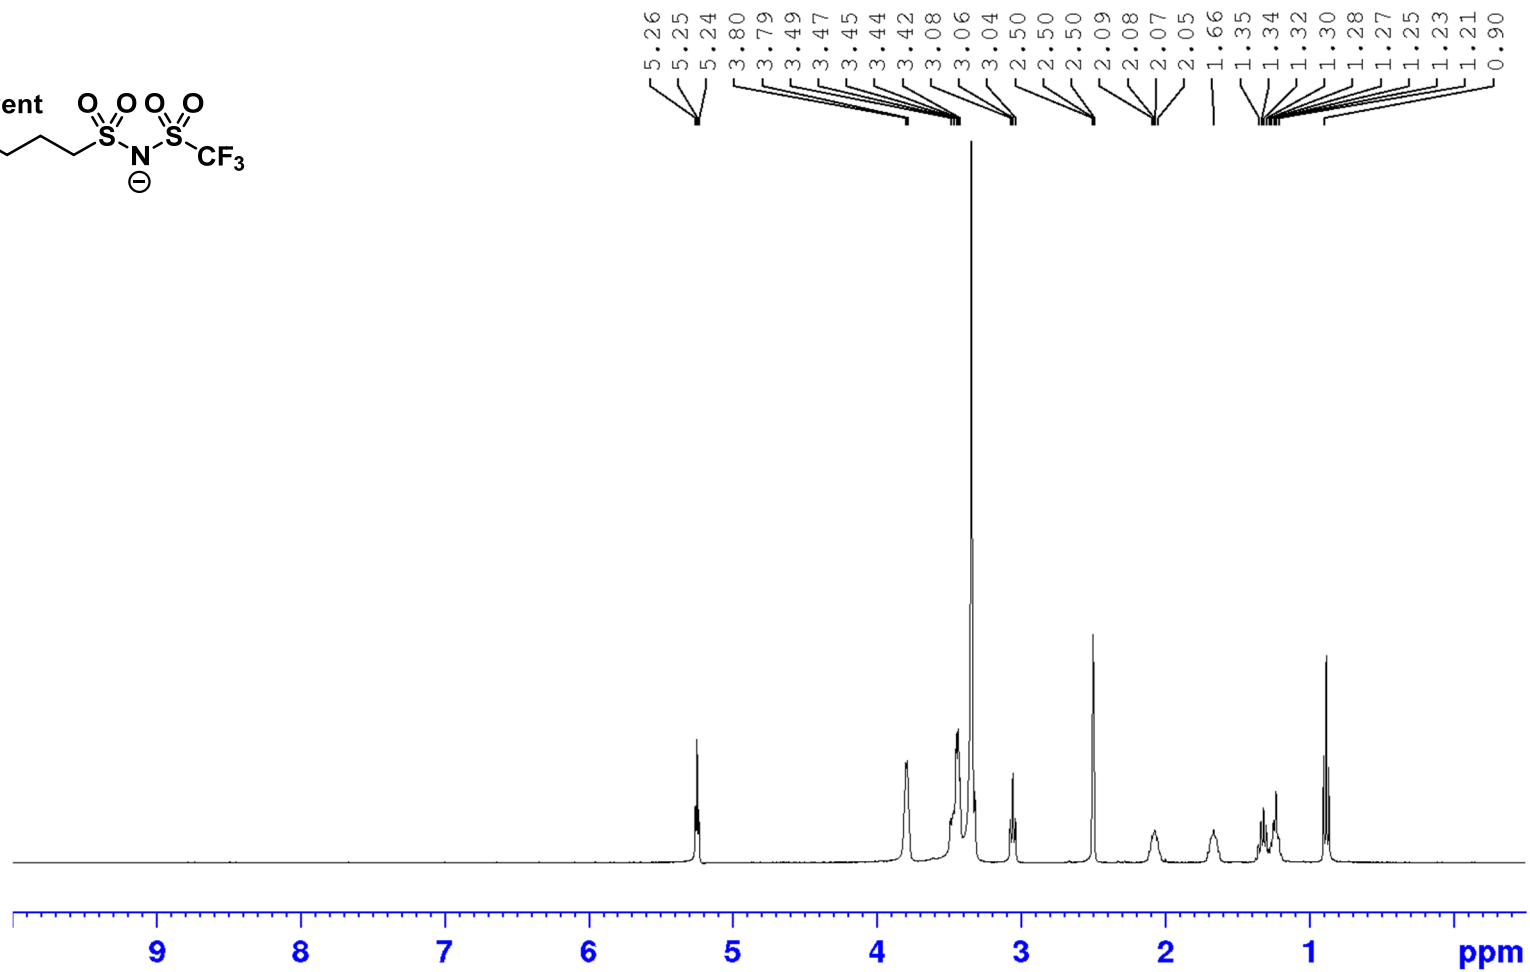

$^{19}\text{F}$  NMR spectrum of **ZIL 4e**

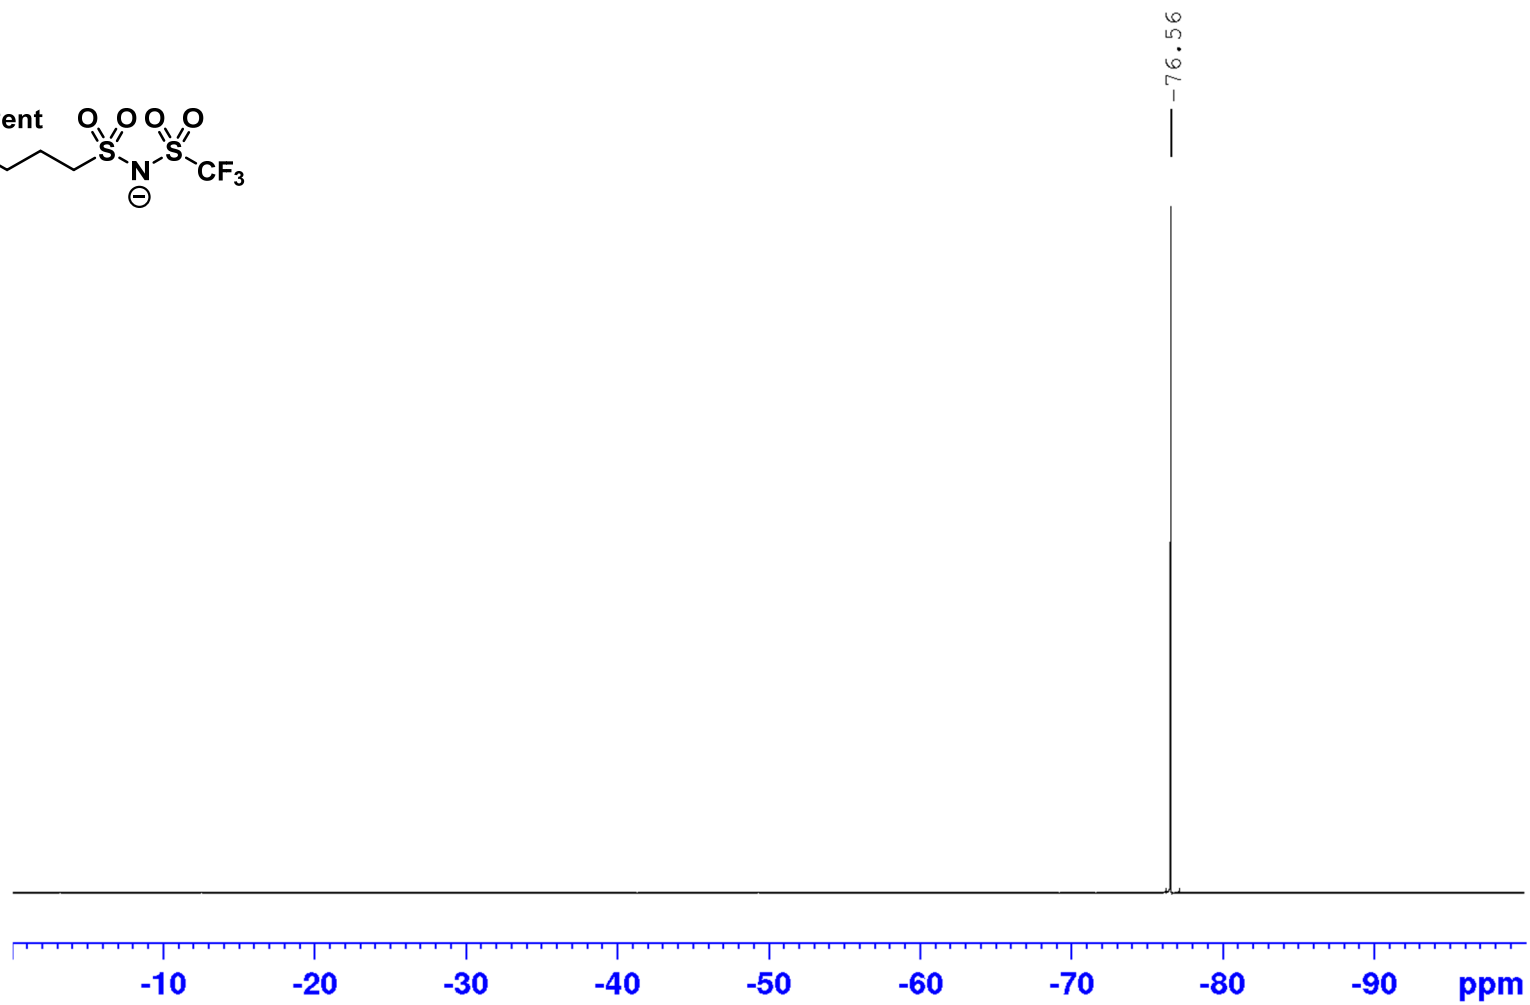

$^{13}\text{C}$  NMR spectrum of **ZIL 4e**

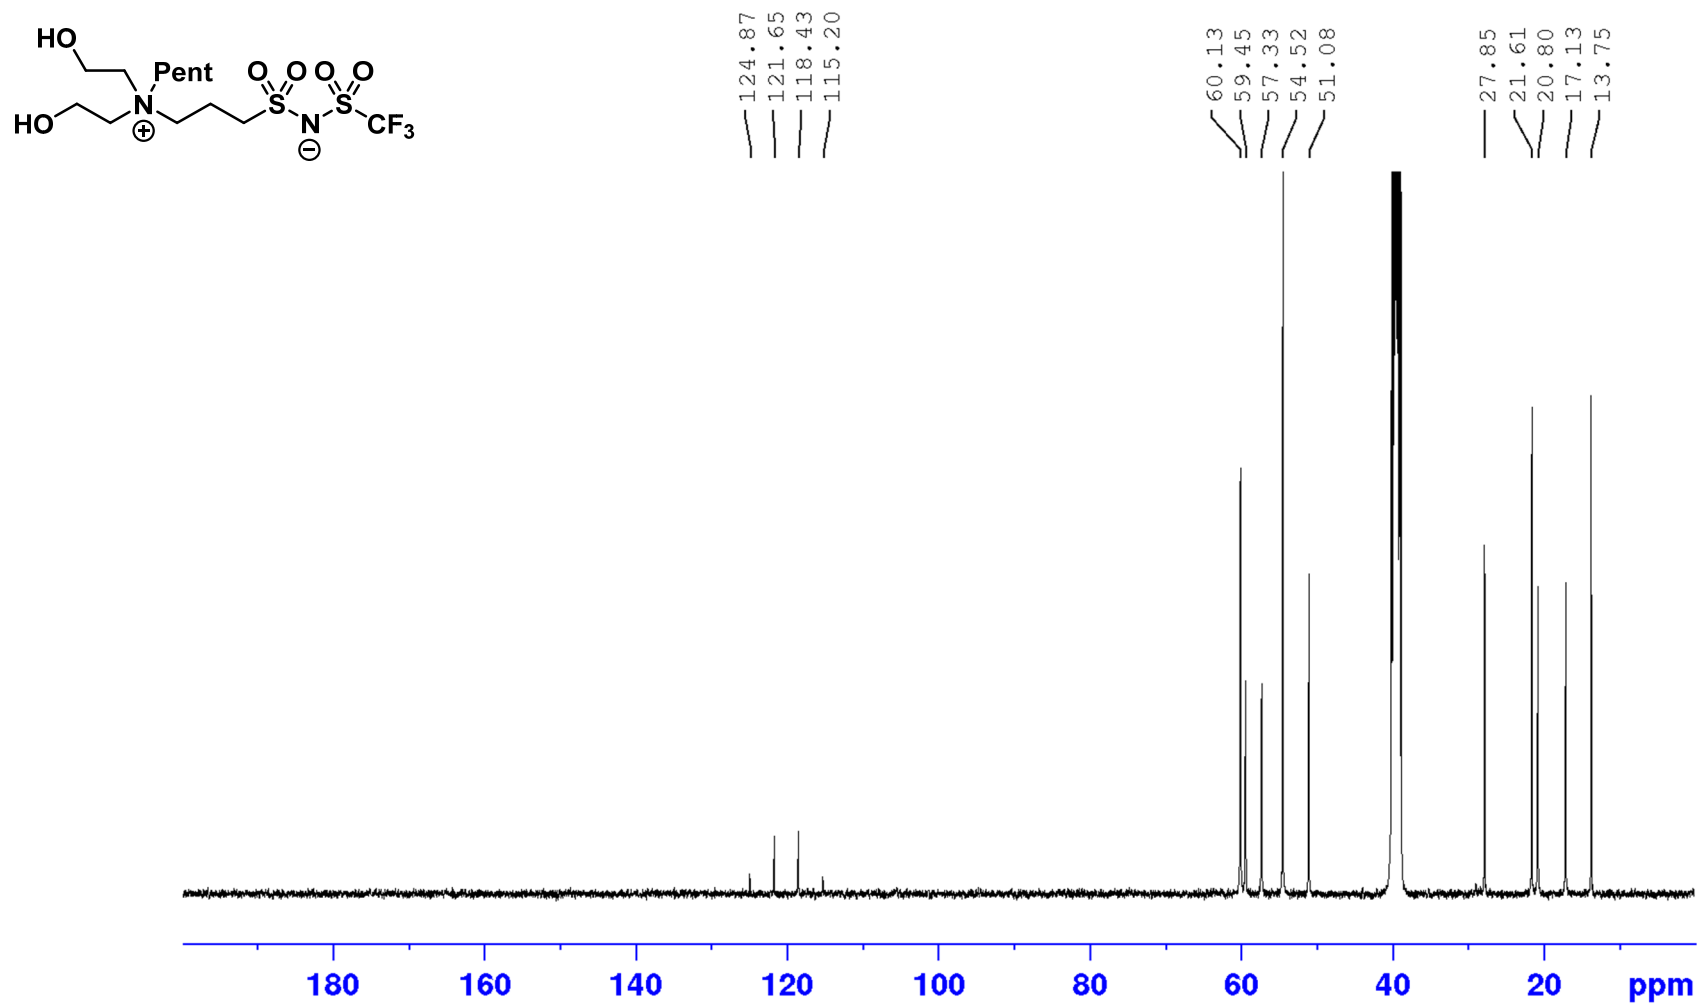

# Mass spectrum of ZIL 4e

Spectrum

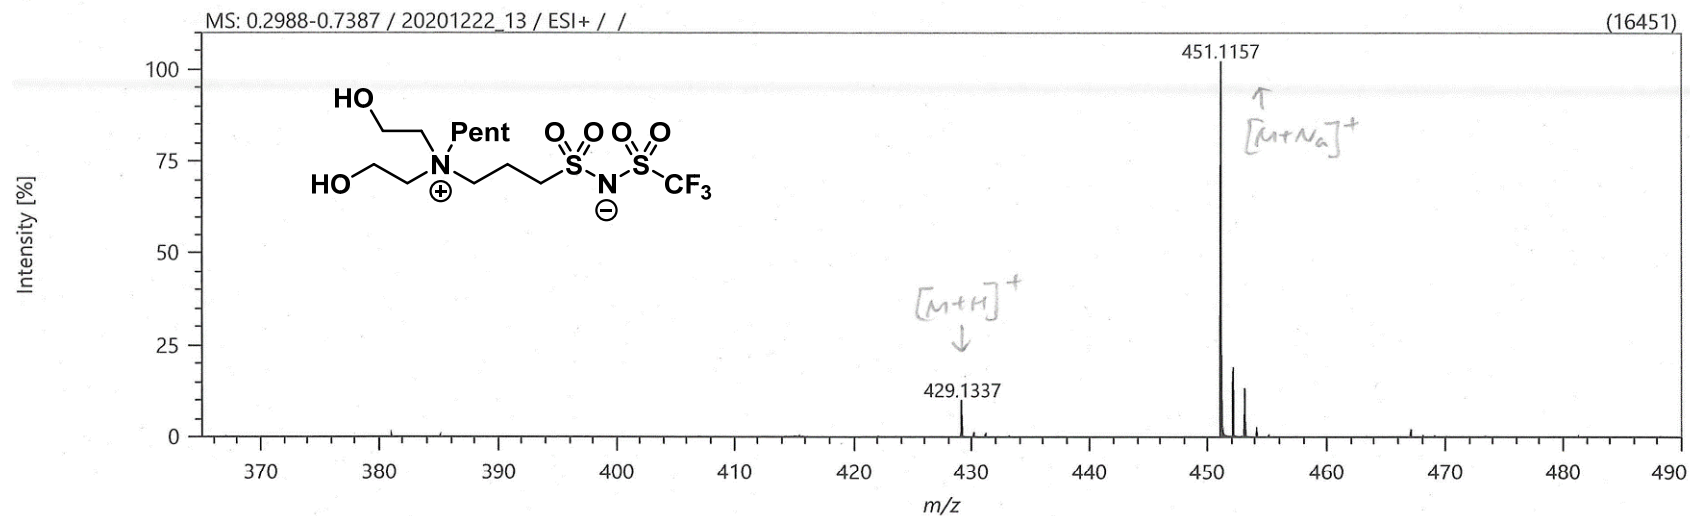

## Elemental Composition

Parameters

Tolerance:  $\pm 2.00$  ppm  
 Electron: Odd/Even  
 Charge: +1  
 DBE: -99.0 - 999.0

Elements Set 1:

| Symbol | C   | H    | F | N | O | S | Na |
|--------|-----|------|---|---|---|---|----|
| Min    | 0   | 0    | 3 | 2 | 6 | 2 | 0  |
| Max    | 400 | 1000 | 3 | 2 | 6 | 2 | 1  |

## Results

| Mass      | Formula                                                                                        | Calculated Mass | Mass Difference [mDa] | Mass Difference [ppm] | DBE  |
|-----------|------------------------------------------------------------------------------------------------|-----------------|-----------------------|-----------------------|------|
| 429.13368 | C <sub>13</sub> H <sub>28</sub> N <sub>2</sub> O <sub>6</sub> F <sub>3</sub> S <sub>2</sub>    | 429.13354       | 0.14                  | 0.34                  | -0.5 |
| 451.11574 | C <sub>13</sub> H <sub>27</sub> N <sub>2</sub> O <sub>6</sub> F <sub>3</sub> Na S <sub>2</sub> | 451.11548       | 0.26                  | 0.57                  | -0.5 |

$^1\text{H}$  NMR spectrum of **ZIL 4f**

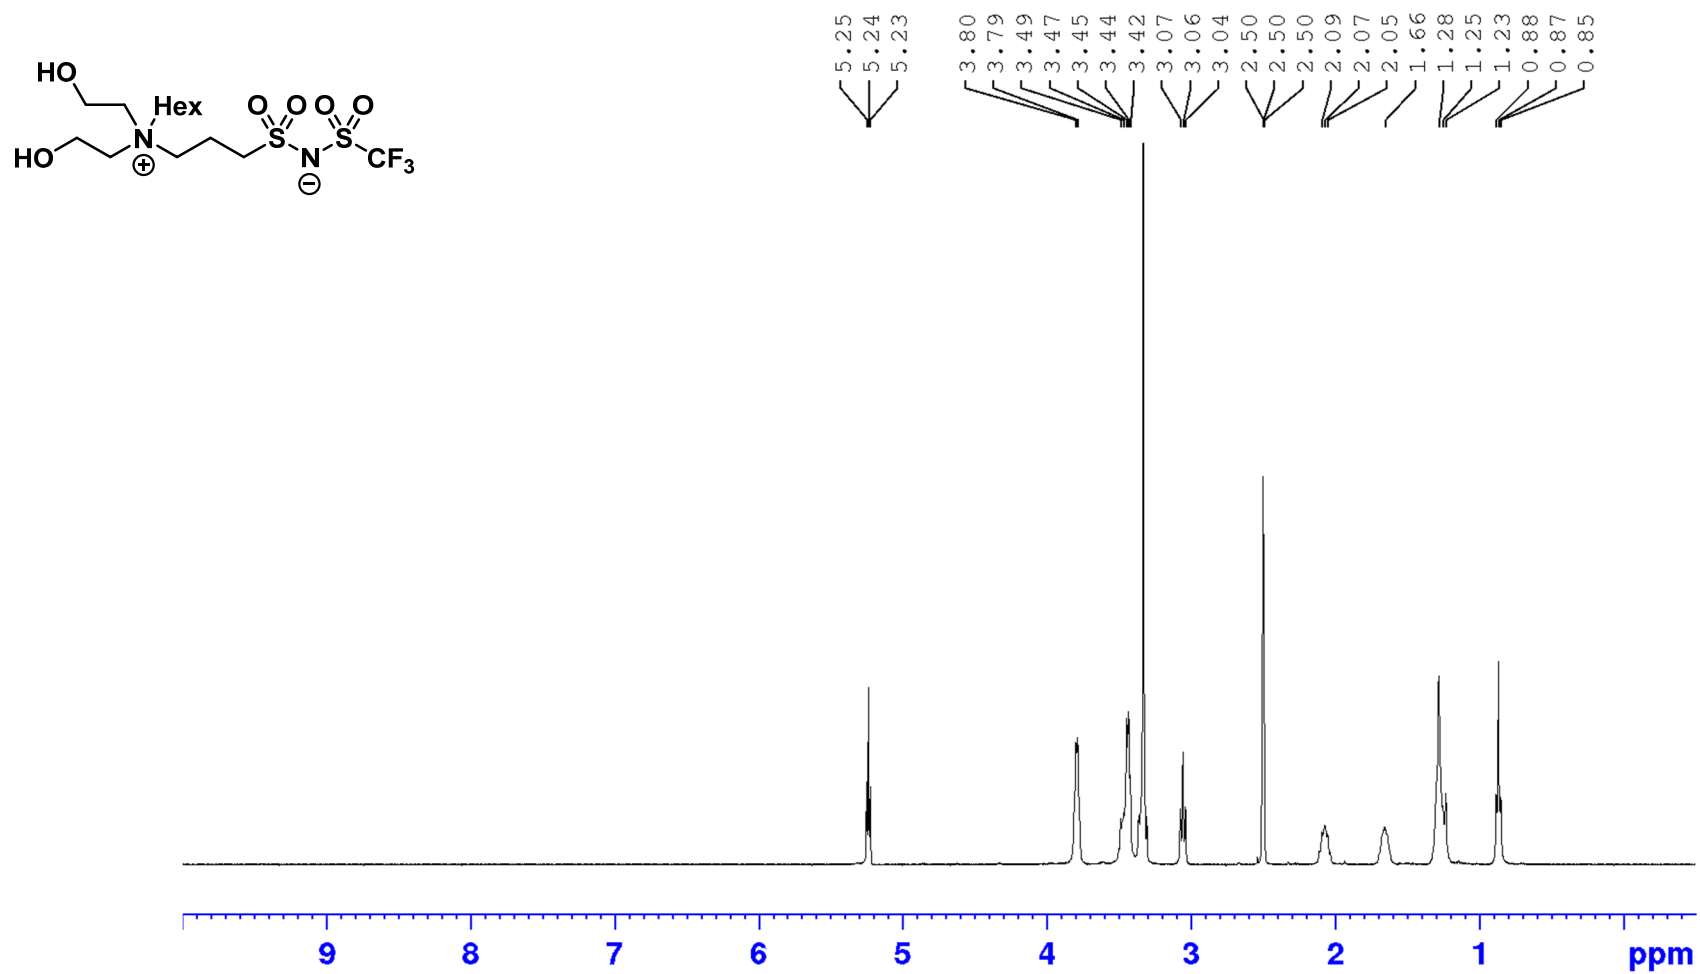

$^{19}\text{F}$  NMR spectrum of **ZIL 4f**

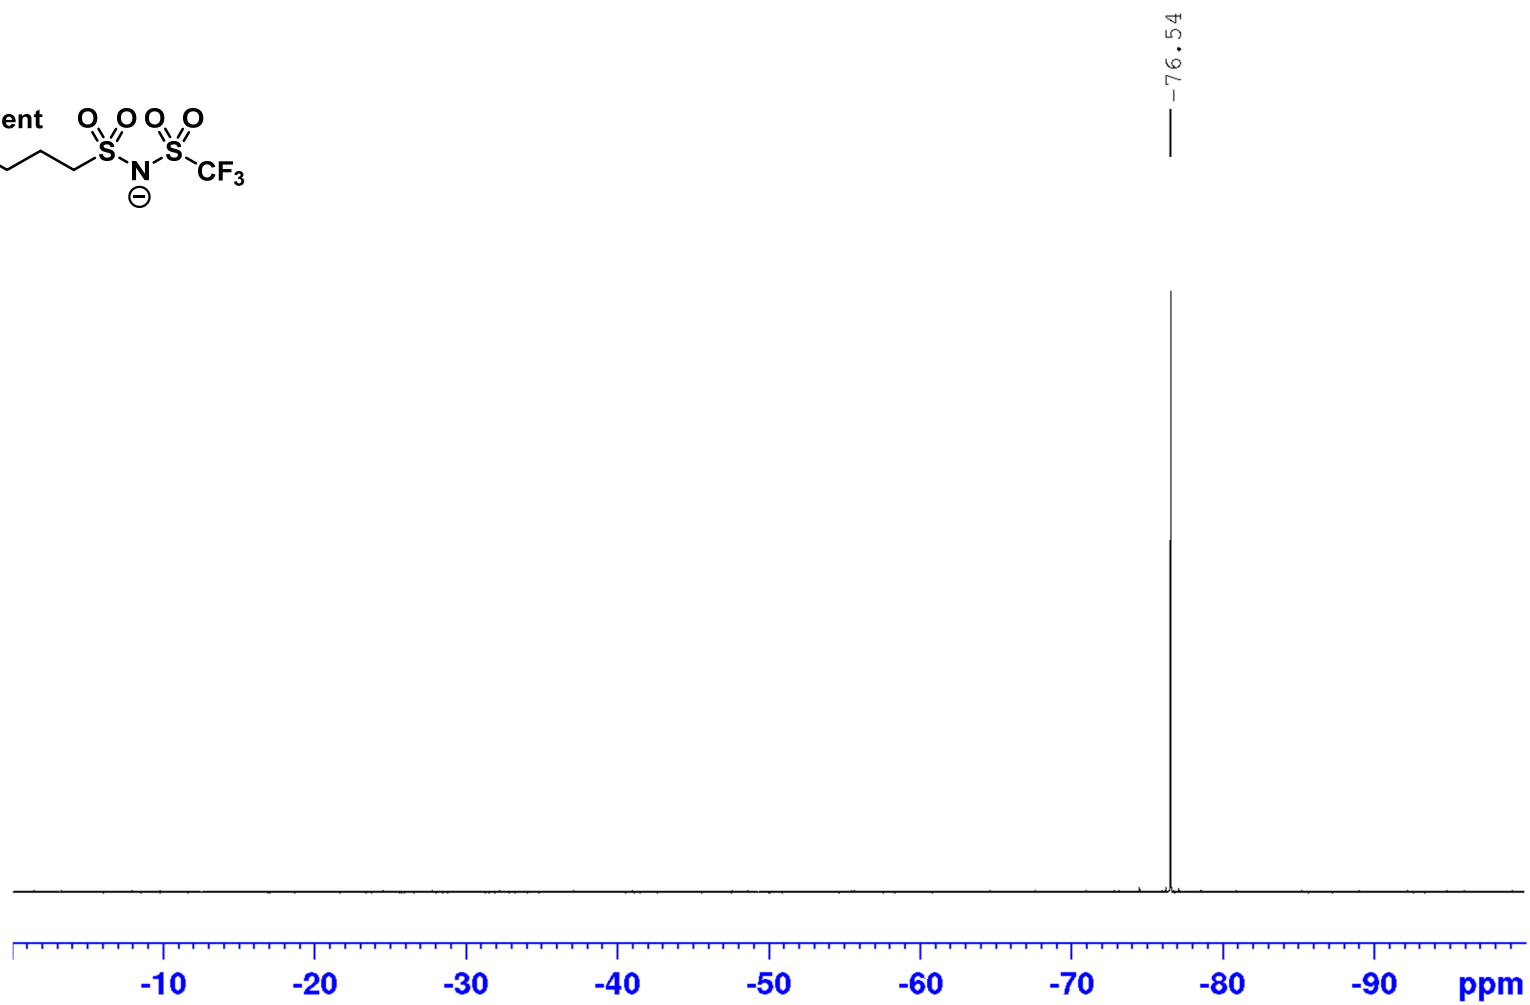

$^{13}\text{C}$  NMR spectrum of **ZIL 4f**

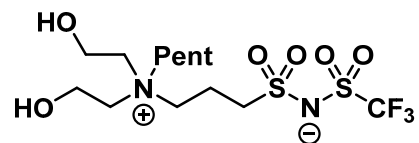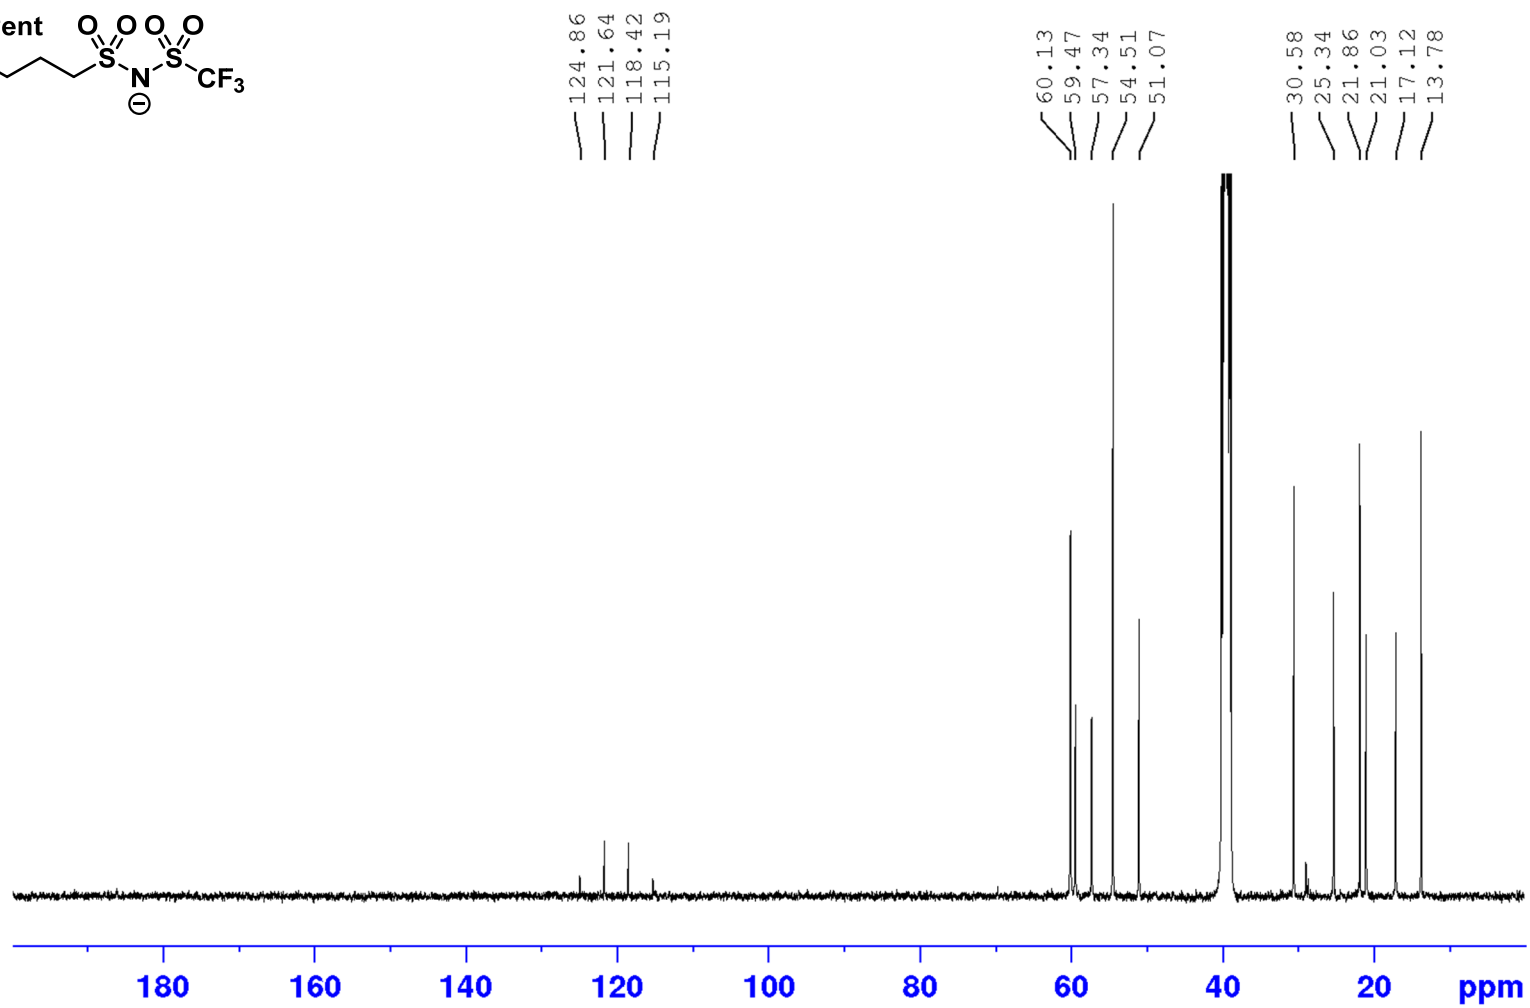

# Mass spectrum of ZIL 4f

Spectrum

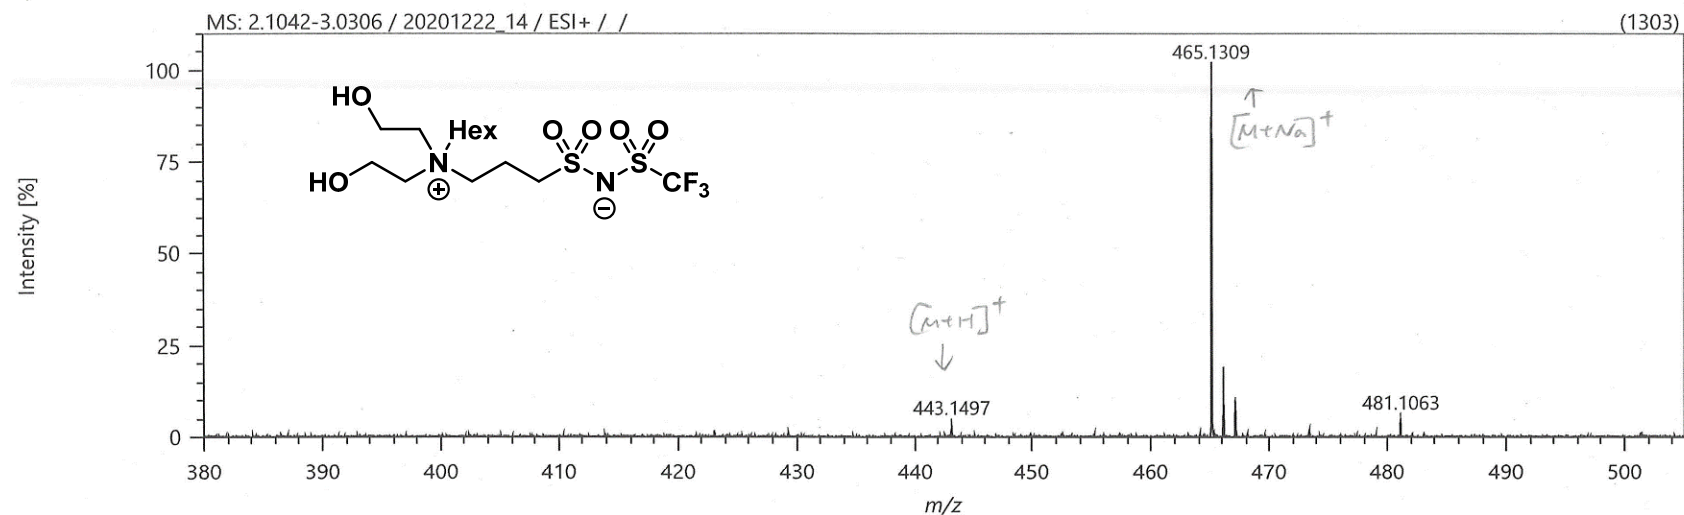

## Elemental Composition

Parameters

Tolerance:  $\pm 2.00$  ppm  
 Electron: Odd/Even  
 Charge: +1  
 DBE: -99.0 - 999.0

Elements Set 1:

| Symbol | C   | H    | F | N | O | S | Na |
|--------|-----|------|---|---|---|---|----|
| Min    | 0   | 0    | 3 | 2 | 6 | 2 | 0  |
| Max    | 400 | 1000 | 3 | 2 | 6 | 2 | 1  |

## Results

| Mass      | Formula                                                                                        | Calculated Mass | Mass Difference [mDa] | Mass Difference [ppm] | DBE  |
|-----------|------------------------------------------------------------------------------------------------|-----------------|-----------------------|-----------------------|------|
| 443.14969 | C <sub>14</sub> H <sub>30</sub> N <sub>2</sub> O <sub>6</sub> F <sub>3</sub> S <sub>2</sub>    | 443.14919       | 0.50                  | 1.13                  | -0.5 |
| 465.13089 | C <sub>14</sub> H <sub>29</sub> N <sub>2</sub> O <sub>6</sub> F <sub>3</sub> Na S <sub>2</sub> | 465.13113       | -0.24                 | -0.53                 | -0.5 |
